# Supplementary material for: Catalytic asymmetric 1,4-type Friedel–Crafts (hetero)arylations of 1-azadienes: the highly enantioselective syntheses of chiral hetero-triarylmethanes
Source: Royal Society of Chemistry journal article supplement (doi:10.1039/c9qo01391a), 2020-01-01
Supplement: c9qo01391a1.pdf [file c9qo01391a1.pdf]

## ***Electronic Supplementary Information***

### **Catalytic Asymmetric 1,4-Type Friedel-Crafts (Hetero)Arylation of 1-Azadienes: Highly Enantioselective Synthesis of Chiral Hetero-Triarylmethanes**

Cheng-Jie Wang, Qi-Qiong Yang, Mei-Xin Wang, Yun-Han Shang, Xin-Yu Tong, Yu-Hua Deng\* and Zhihui Shao\*

E-mail: dengyuhua@ynu.edu.cn; zhihui\_shao@hotmail.com

<sup>a</sup> Key Laboratory of Medicinal Chemistry for Natural Resource, Ministry of Education, School of Chemical Science and Technology, Yunnan University, Kunming, 650091, China.

#### **Table of Contents**

|                                                                            |     |
|----------------------------------------------------------------------------|-----|
| 1 General Information.....                                                 | S2  |
| 2 General Procedure for the Preparation of Substrates.....                 | S2  |
| 3 Optimization of Asymmetric Catalytic Reactions .....                     | S5  |
| 4 General Procedure for the Asymmetric Friedel-Crafts Arylation.....       | S9  |
| 5 General Procedure for the Asymmetric Friedel-Crafts Heteroarylation..... | S20 |
| 6 General Procedure for the Gram-Scale Syntheses .....                     | S27 |
| 7 General Procedure of the Protection for <b>3a</b> .....                  | S28 |
| 8 Assignment of Absolute Configuration for Products .....                  | S29 |
| 9 References.....                                                          | S31 |
| 10 Copies of NMR and HPLC Spectrums .....                                  | S32 |

## 1 General Information

Unless otherwise specified, all reactions were carried out under argon atmosphere in anhydrous conditions. All the solvents were purified according to the standard procedures. All chemicals which are commercially available were used without further purification unless otherwise noted. Thin-layer chromatography (TLC) was performed on silica gel plates (60F-254) using UV-light (254 and 365nm).

$^1\text{H}$ -NMR and  $^{13}\text{C}$ -NMR spectra were recorded at 400 MHz or 600 MHz spectrophotometer. Chemical shifts ( $\delta$ ) are expressed in ppm, and  $J$  values are given in Hz. NMR multiplicities are abbreviated as follows: s = singlet, br = broad signal, d = doublet, t = triplet, q = quartet, m = multiple, dd = doublet of doublet. Values of enantiomeric excess was determined by chiral HPLC (Agilent 1260 Infinity) with *n*-hexane and *i*-propanol as eluents. High resolution mass spectrometry (HRMS) was recorded on an ESI-ion trap Mass spectrometer (Agilent 1100 series LC/MSD, SL model). Optical rotations were measured on a Jasco P-2000 polarimeter. All chemicals and solvents were used as received without further purification unless otherwise stated. Column chromatography was performed on silica gel (200–300 mesh).

## 2 General Procedure for the Preparation of Substrates

### 2.1 General Procedure for the Synthesis of Azadienes

According to the known procedures,<sup>[1]</sup> benzofuran-fused 1-azadienes **1a-1l** were synthesized. According to the known procedures,<sup>[1b,2]</sup> benzofuran-fused enones **ia-il** were synthesized.

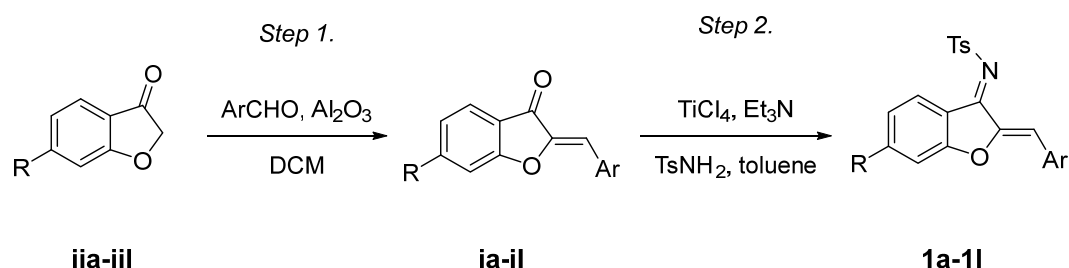

**Step 1:** Aluminium oxide (13.0g, activated, basic) was added to a solution of ketones **ii** (4 mmol) and aldehydes (8 mmol) in dichloromethane (30 mL). The mixture was violently stirred at room temperature under argon atmosphere. The progress of the reaction was monitored by TLC analysis. The suspension was filtered off, and the residue was washed with dichloromethane. Combined and concentrated the filtrates. The residue was purified by flash chromatography on silica gel to give enones **i**.

**Step 2:** 4-Methylbenzenesulfonamide (513 mg, 3.00 mmol) and heterocyclic enones **I** (3.00 mmol) were added in a round bottom flask in toluene (40 mL) and cooled to 0 °C. Then, Et<sub>3</sub>N (0.84 mL, 6.0 mmol) and TiCl<sub>4</sub> (1.0 M in Toluene, 3.0 mL, 3.0 mmol) were successively added. The reaction mixture was heated to reflux for overnight. The solution was then cooled to room temperature, quenched with water (100 mL) and extracted with DCM (3 × 30 mL). The combined organic phase was dried over Na<sub>2</sub>SO<sub>4</sub> and concentrated. The residue was purified by flash chromatography on silica gel to afford benzofuran-fused 1-azadienes **1**.

## 2.2 General Procedure for the Synthesis of $\beta$ -Naphthol Derivatives

According to the known literature procedures,<sup>[3]</sup> (6-naphthyl)- $\beta$ -naphthols **2b** was synthesized. All the others  $\beta$ -naphthols were obtained from the commercially available.

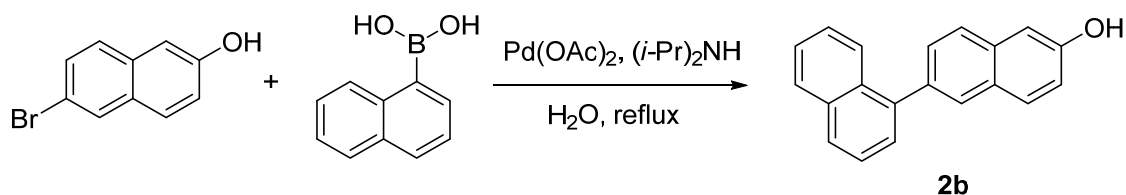

To a mixture of 6-bromonaphthalen-2-ol (1.1 g, 5 mmol, 1 eq.), 1-naphthylboronic acid (7.5 mmol, 1.5 eq.) and Pd(OAc)<sub>2</sub> (45 mg, 0.2 mmol, 0.04 eq.) in water (10 mL) was added diisopropylamine (1 mL). After heat to reflux for 10

hours, the mixture was then filtered and washed with ethyl acetate ( $3 \times 10$  mL), The aqueous layer was extracted with ethyl acetate. The organic layer was washed with brine, dried over  $\text{Na}_2\text{SO}_4$ , filtered and then concentrated. The residue was purified by silica gel column chromatograph (ethyl acetate/petroleum ether = 1/20, v/v) to afford the product **2b**.

## 2.3 All Substrates for the Asymmetric Friedel-Crafts Reactions

(a) Substrates of Benzofuran fused 1-Azadienes

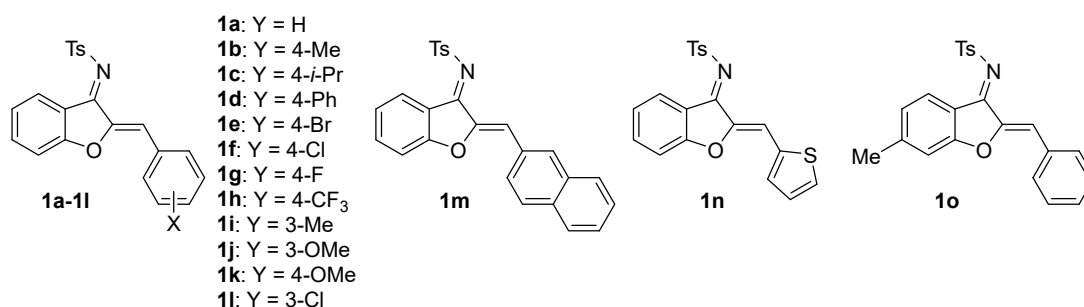

(b) Substrates of 2-Naphthols and phenols

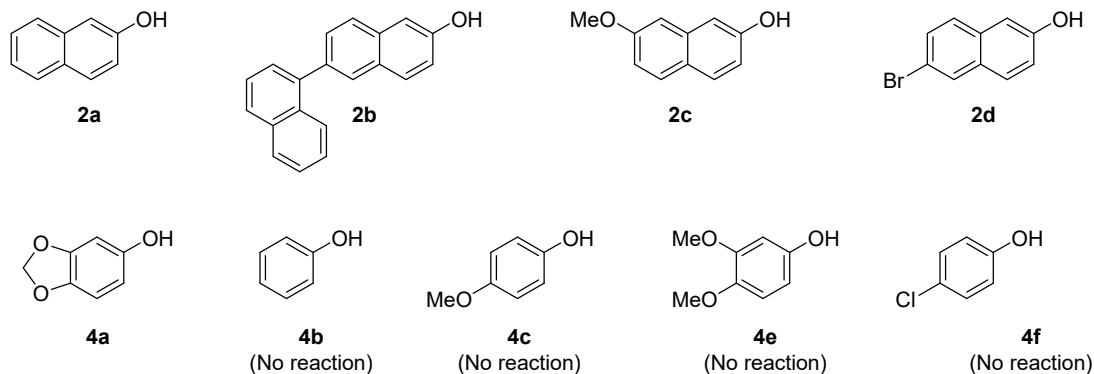

(c) Substrates of Indoles

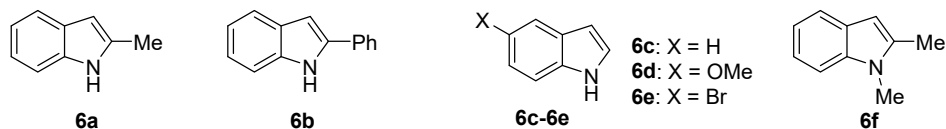

**Figure S1.** All the substrates employed in the asymmetric F-C reactions



### 3 Optimization of Asymmetric Catalytic Reactions

#### 3.1 Asymmetric Friedel-Crafts Arylation of Azadienes and $\beta$ -Naphthol

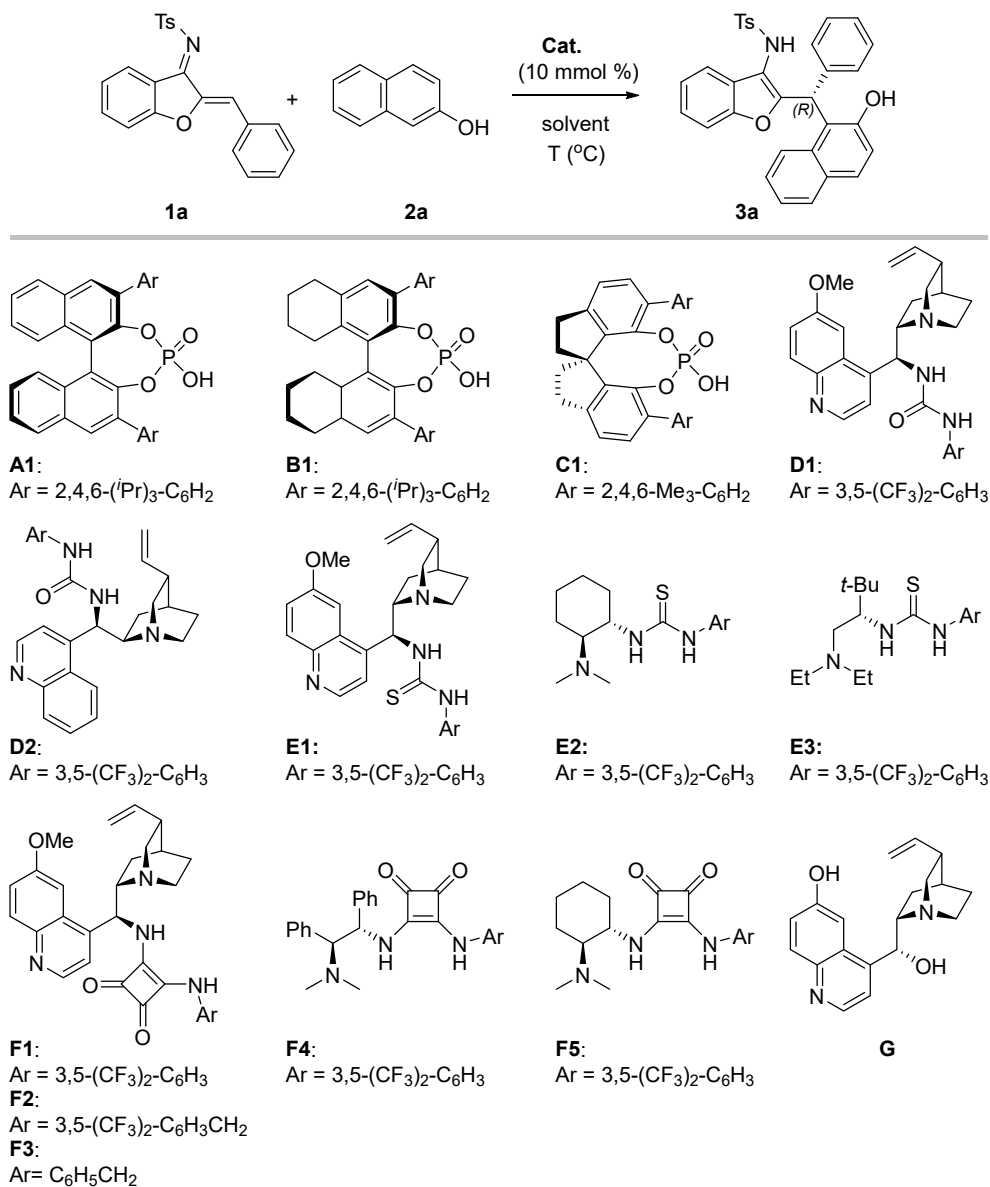

**Table S1.** Optimization of Friedel-Crafts Arylation of Azadienes **1a** and  $\beta$ -Naphthol **2a** <sup>a</sup>

| Entry | Cat       | Solvent | T (°C) | <i>t</i> (h) | Yield (%) <sup>b</sup> | Ee (%) <sup>c</sup> |
|-------|-----------|---------|--------|--------------|------------------------|---------------------|
| 1     | <b>A1</b> | toluene | 20     | 6            | 61                     | 3 ( <i>R</i> )      |
| 2     | <b>B1</b> | toluene | 20     | 48           | 48                     | 3 ( <i>S</i> )      |
| 3     | <b>C1</b> | toluene | 20     | 24           | 45                     | 52 ( <i>S</i> )     |

|    |           |                                   |     |    |       |                 |
|----|-----------|-----------------------------------|-----|----|-------|-----------------|
| 4  | <b>D1</b> | toluene                           | 20  | 18 | 93    | 85 ( <i>R</i> ) |
| 5  | <b>D2</b> | toluene                           | 20  | 18 | 88    | 85 ( <i>S</i> ) |
| 6  | <b>E1</b> | toluene                           | 20  | 18 | 88    | 85 ( <i>R</i> ) |
| 7  | <b>E2</b> | toluene                           | 20  | 24 | 76    | 70 ( <i>R</i> ) |
| 8  | <b>E3</b> | toluene                           | 20  | 24 | 71    | 38 ( <i>R</i> ) |
| 9  | <b>F1</b> | toluene                           | 20  | 4  | 88    | 80 ( <i>R</i> ) |
| 10 | <b>F2</b> | toluene                           | 20  | 48 | 87    | 75 ( <i>R</i> ) |
| 11 | <b>F3</b> | toluene                           | 20  | 24 | 77    | 41 ( <i>S</i> ) |
| 12 | <b>F4</b> | toluene                           | 20  | 48 | trace | /               |
| 13 | <b>F5</b> | toluene                           | 20  | 18 | 89    | 72 ( <i>R</i> ) |
| 14 | <b>G</b>  | toluene                           | 20  | 6  | 67    | 21 ( <i>R</i> ) |
| 15 | <b>D1</b> | MeOH                              | 20  | 72 | 60    | 0               |
| 16 | <b>D1</b> | THF                               | 20  | 48 | 36    | 17 ( <i>R</i> ) |
| 17 | <b>D1</b> | MeCN                              | 20  | 48 | 16    | 65 ( <i>R</i> ) |
| 18 | <b>D1</b> | Et <sub>2</sub> O                 | 20  | 48 | 48    | 71 ( <i>R</i> ) |
| 19 | <b>D1</b> | CH <sub>2</sub> Cl <sub>2</sub>   | 20  | 12 | 97    | 87 ( <i>R</i> ) |
| 20 | <b>D1</b> | (CH <sub>2</sub> Cl) <sub>2</sub> | 20  | 12 | 79    | 86 ( <i>R</i> ) |
| 21 | <b>D1</b> | CHCl <sub>3</sub>                 | 20  | 18 | 84    | 87 ( <i>R</i> ) |
| 22 | <b>D1</b> | PhCF <sub>3</sub>                 | 20  | 18 | 85    | 87 ( <i>R</i> ) |
| 23 | <b>D1</b> | toluene                           | -40 | 30 | 95    | 93 ( <i>R</i> ) |
| 24 | <b>D1</b> | toluene                           | -30 | 21 | 89    | 92 ( <i>R</i> ) |
| 25 | <b>D1</b> | toluene                           | -20 | 20 | 90    | 90 ( <i>R</i> ) |
| 26 | <b>D1</b> | CH <sub>2</sub> Cl <sub>2</sub>   | -40 | 48 | 68    | 42 ( <i>R</i> ) |
| 27 | <b>D1</b> | CH <sub>2</sub> Cl <sub>2</sub>   | -30 | 21 | 80    | 79 ( <i>R</i> ) |
| 28 | <b>D1</b> | CH <sub>2</sub> Cl <sub>2</sub>   | -20 | 20 | 80    | 82 ( <i>R</i> ) |
| 30 | <b>D1</b> | CH <sub>2</sub> Cl <sub>2</sub>   | 40  | 12 | 86    | 86 ( <i>R</i> ) |

<sup>a</sup>Unless otherwise specified, the reaction was conducted with **1a** (0.1 mmol), **2a** (0.12 mmol), catalyst (10 mmol %) in the indicated solvent (2 mL). <sup>b</sup>Yield of isolated product. <sup>c</sup>Determined by HPLC.

## 3.2 Asymmetric Friedel-Crafts Heteroarylation of Azadienes and 2-Me Substituted Indoles

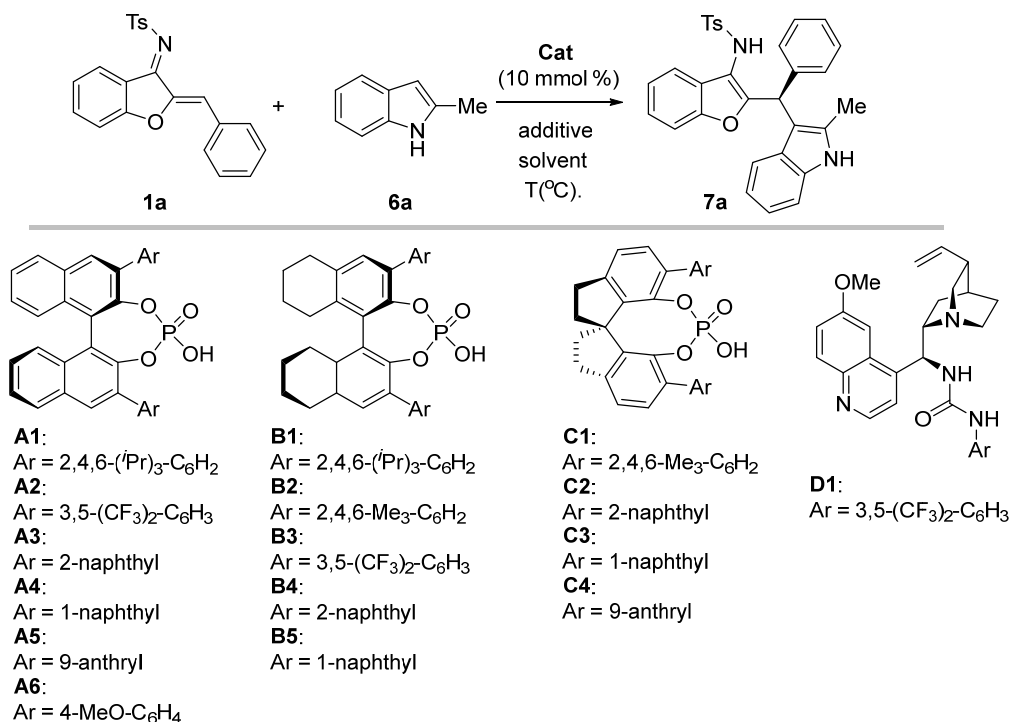

**Table S2.** Optimization of Friedel-Crafts Heteroarylation of Azadienes **1a** and 2-Me substituted indole **6a** <sup>a</sup>

| Entry | Cat       | additive | Solvent | T (°C) | <i>t</i> | Yield (%) <sup>b</sup> | ee (%) <sup>c</sup> |
|-------|-----------|----------|---------|--------|----------|------------------------|---------------------|
| 1     | <b>D1</b> | /        | toluene | 20     | 24 h     | 45                     | 40 ( <i>S</i> )     |
| 2     | <b>A1</b> | /        | toluene | 20     | 2 h      | 94                     | 53 ( <i>S</i> )     |
| 3     | <b>A2</b> | /        | toluene | 20     | 10 min   | 96                     | 32 ( <i>S</i> )     |
| 4     | <b>A3</b> | /        | toluene | 20     | 2 h      | 96                     | 3 ( <i>R</i> )      |
| 5     | <b>A4</b> | /        | toluene | 20     | 10 min   | 97                     | 13 ( <i>R</i> )     |
| 6     | <b>A5</b> | /        | toluene | 20     | 10 min   | 98                     | 3 ( <i>S</i> )      |
| 7     | <b>A6</b> | /        | toluene | 20     | 10 min   | 93                     | 20 ( <i>R</i> )     |
| 8     | <b>B1</b> | /        | toluene | 20     | 1 h      | 98                     | 73 ( <i>S</i> )     |
| 9     | <b>B2</b> | /        | toluene | 20     | 10 min   | 96                     | 53 ( <i>S</i> )     |
| 10    | <b>B3</b> | /        | toluene | 20     | 10 min   | 96                     | 43 ( <i>S</i> )     |
| 11    | <b>B4</b> | /        | toluene | 20     | 10 min   | 97                     | 40 ( <i>R</i> )     |
| 12    | <b>B5</b> | /        | toluene | 20     | 10 min   | 94                     | 5 ( <i>R</i> )      |
| 13    | <b>C1</b> | /        | toluene | 20     | 2 h      | 98                     | 31 ( <i>R</i> )     |
| 14    | <b>C2</b> | /        | toluene | 20     | 1 h      | 97                     | 55 ( <i>S</i> )     |
| 15    | <b>C3</b> | /        | toluene | 20     | 30 min   | 94                     | 13 ( <i>S</i> )     |

|    |           |       |                                 |     |        |       |                 |
|----|-----------|-------|---------------------------------|-----|--------|-------|-----------------|
| 16 | <b>C4</b> | /     | toluene                         | 20  | 30 min | 98    | 17 ( <i>S</i> ) |
| 19 | <b>B1</b> | /     | toluene                         | 20  | 10 min | 93    | 7 ( <i>S</i> )  |
| 20 | <b>B1</b> | /     | toluene                         | 20  | 1 h    | 98    | 73 ( <i>S</i> ) |
| 21 | <b>B1</b> | /     | CH <sub>2</sub> Cl <sub>2</sub> | 20  | 1 h    | 97    | 77 ( <i>S</i> ) |
| 22 | <b>B1</b> | /     | THF                             | 20  | 24 h   | trace | /               |
| 23 | <b>B1</b> | /     | MeCN                            | 20  | 2 h    | 85    | 73 ( <i>S</i> ) |
| 24 | <b>B1</b> | /     | CH <sub>2</sub> Cl <sub>2</sub> | 20  | 1 h    | 98    | 84 ( <i>S</i> ) |
| 25 | <b>B1</b> | 4Å MS | CH <sub>2</sub> Cl <sub>2</sub> | 20  | 1 h    | 98    | 87 ( <i>S</i> ) |
| 26 | <b>B1</b> | 3Å MS | CH <sub>2</sub> Cl <sub>2</sub> | 20  | 1 h    | 98    | 88 ( <i>S</i> ) |
| 27 | <b>B1</b> | 3Å MS | CH <sub>2</sub> Cl <sub>2</sub> | 0   | 2 h    | 98    | 90 ( <i>S</i> ) |
| 28 | <b>B1</b> | 3Å MS | CH <sub>2</sub> Cl <sub>2</sub> | -10 | 10 h   | 98    | 92 ( <i>S</i> ) |

<sup>a</sup>Unless otherwise specified, the reaction of **1a** (0.1 mmol) and **6a** (0.12 mmol) was conducted in the presence of catalyst (10 mmol %) and indicated additive (50 mg) in the indicated solvent (1 mL). <sup>b</sup>Yield of isolated product. <sup>c</sup>Determined by HPLC.

### 3.3 Effect of Catalyst Loading

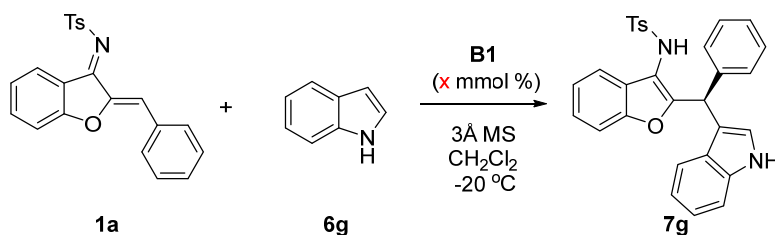

**Table S3.** Investigation of Catalyst loading for the Friedel-Crafts Reaction of **1a** with indole **6g**<sup>a</sup>

| Entry    | <b>B1</b> (x mmol %) | <i>t</i> (h) | Yield (%) <sup>b</sup> | ee (%) <sup>c</sup> |
|----------|----------------------|--------------|------------------------|---------------------|
| <b>1</b> | 10                   | 10           | 98                     | 96 ( <i>S</i> )     |
| <b>2</b> | 5                    | 20           | 95                     | 95 ( <i>S</i> )     |
| <b>3</b> | 2.5                  | 24           | 90                     | 95 ( <i>S</i> )     |
| <b>4</b> | 1.0                  | 46           | 87                     | 94 ( <i>S</i> )     |

<sup>a</sup>Unless otherwise specified, the reaction was conducted with **1a** (0.1 mmol), **6a** (0.12 mmol), **B1** (x mmol %) and 3Å MS (50 mg) in CH<sub>2</sub>Cl<sub>2</sub> (1 mL). <sup>b</sup>Yield of isolated product. <sup>c</sup>Determined by HPLC. Time space yield refer to the amount of product /catalyst loading/reaction time

## 4 General Procedure for the Asymmetric Friedel-Crafts Arylation

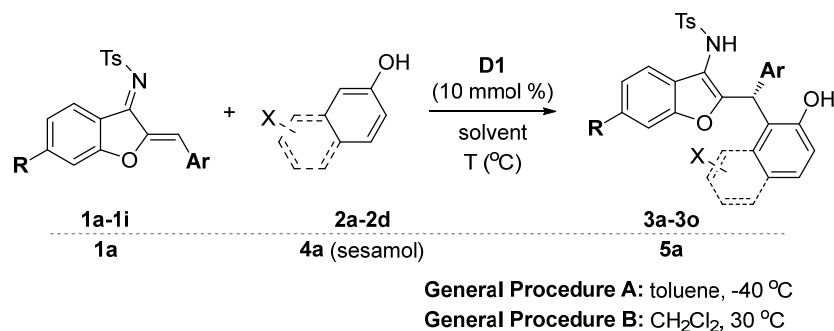

**General Procedure A:** Under argon atmosphere, 1-azadienes **1** (0.1 mmol),  $\beta$ -naphthols **2** (0.12 mmol), the chiral urea catalyst **D1** (10 mmol %) was dissolved in toluene (2 mL). The reaction mixture was allowed to stir at -40 °C for 16 ~ 48 h. Then the reacting mixture was directly purified by silica gel chromatography with the elution of ethyl acetate/petroleum ether = 1/5 to 1/3, affording the desired products **3**.

**General Procedure B:** Under argon atmosphere, 1-azadienes **1** (0.1 mmol),  $\beta$ -naphthols **2** or sesamol **4a** (0.12 mmol) and the chiral urea catalyst **D1** (10 mmol %) was dissolved in CH<sub>2</sub>Cl<sub>2</sub> (2 mL). The reaction mixture was allowed to stir at 30 °C for 12 ~ 48 h. Then the reacting mixture was directly purified by silica gel chromatography with the elution of ethyl acetate/petroleum ether = 1/5 to 1/3, affording the desired products **3** or **5a**.

**(R)-N-(2-((2-hydroxynaphthalen-1-yl)(phenyl)methyl)benzofuran-3-yl)-4-methylbenzenesulfonamide.**

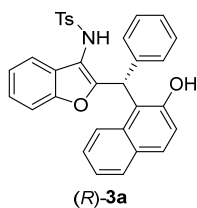

Following the *General Procedure A*, **(R)-3a** was obtained as white solid (30 h, 47.6 mg, 95% yield, 94% ee) after flash chromatography (elution gradient: ethyl acetate/petroleum ether = 1/4); [ $\alpha$ ]<sub>D</sub><sup>20</sup> = -8.4 (*c* 1.0, CHCl<sub>3</sub>); m.p. 216-217 °C; **HRMS (ESI-TOF)** calcd for C<sub>32</sub>H<sub>24</sub>NO<sub>4</sub>S [*M* - *H*]<sup>-</sup> : 518.1432, found: 518.1434; **<sup>1</sup>H NMR**

(400 MHz, acetone- $d^6$ , ppm):  $\delta$  9.40 (s, 1H), 8.06 (s, 1H), 7.76 (dd, 1H,  $J$  = 3.5, 6.3 Hz), 7.65-7.58 (m, 2H), 7.49 (d, 2H,  $J$  = 8.4 Hz), 7.45-7.38 (m, 1H), 7.24-7.17 (m, 2H), 7.11-7.03 (m, 7H), 6.95 (d, 2H,  $J$  = 8.1 Hz), 6.66-6.64 (m, 2H), 6.31 (s, 1H), 2.01 (s, 3H);  $^{13}\text{C}$  NMR (100 MHz, acetone- $d^6$ , ppm):  $\delta$  154.0, 153.4, 152.6, 143.8, 139.8, 136.4, 132.7, 129.9, 129.6, 128.4, 127.9, 127.6, 127.1, 126.1, 125.94, 125.86, 125.4, 124.4, 122.9, 122.8, 120.1, 118.1, 117.7, 115.8, 111.1, 37.7, 20.6; **HPLC analysis**: Daicel CHIRALCEL OD-H, *n*-hexane/*i*-PrOH = 85/15, flow rate = 1.0 mL/min,  $\lambda$  = 230 nm, retention time:  $t_R$  = 5.4 min (major),  $t_R$  = 6.3 min (minor).

**(*R*)-*N*-(2-((2-hydroxynaphthalen-1-yl)(*p*-tolyl)methyl)benzofuran-3-yl)-4-methylbenzenesulfonamide.**

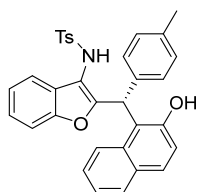

(*R*)-**3b**

Following the *General Procedure B*, (*R*)-**3b** was obtained as white solid (24 h, 50.5 mg, 90% yield, 96% ee) after flash chromatography (elution gradient: ethyl acetate/petroleum ether = 1/5);  $[\alpha]_D^{20}$  = -12.2 (*c* 1.0,  $\text{CHCl}_3$ ); m.p. 206-207 °C; **HRMS (ESI-TOF)** calcd for  $\text{C}_{33}\text{H}_{26}\text{NO}_4\text{S}$   $[\text{M} - \text{H}]^-$  : 532.1588, found: 532.1589;  $^1\text{H}$  NMR (400 MHz, acetone- $d^6$ , ppm):  $\delta$  7.97-7.88 (m, 1H), 7.76-7.70 (m, 2H), 7.66-7.58 (m, 3H), 7.40-7.29 (m, 2H), 7.26-7.17 (m, 4H), 7.09 (d, 2H,  $J$  = 7.6 Hz), 6.98 (d, 2H,  $J$  = 8.0 Hz), 6.66 (d, 2H,  $J$  = 7.9 Hz), 6.39 (s, 1H), 2.29 (s, 3H), 2.15 (s, 3H);  $^{13}\text{C}$  NMR (100 MHz, acetone- $d^6$ , ppm):  $\delta$  154.2, 153.4, 152.6, 143.7, 136.7, 136.2, 135.2, 132.7, 129.9, 129.6, 129.5, 128.6, 128.4, 127.2, 126.1, 125.9, 125.4, 124.3, 122.8, 122.7, 120.1, 118.3, 117.7, 115.7, 111.1, 37.3, 20.5, 20.1; **HPLC analysis**: Daicel CHIRALPAK IA, *n*-hexane/*i*-PrOH = 90/10, flow rate = 1.0 mL/min,  $\lambda$  = 254 nm, retention time:  $t_R$  = 9.7 min (minor),  $t_R$  = 13.5 min (major).

**(R)-N-(2-((2-hydroxynaphthalen-1-yl)(4-isopropylphenyl)methyl)benzofuran-3-yl)-4-methylbenzenesulfonamide.**

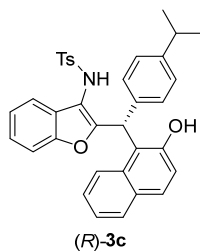

Following the *General Procedure A*, (R)-**3c** was obtained as white solid (16 h, 39.4 mg, 72% yield, 99% ee) after flash chromatography (elution gradient: ethyl acetate/petroleum ether = 1/5);  $[\alpha]_D^{20} = -8.5$  ( $c$  1.0,  $\text{CHCl}_3$ ); m.p. 203-204 °C; **HRMS (ESI-TOF)** calcd for  $\text{C}_{35}\text{H}_{30}\text{NO}_4\text{S}$   $[\text{M} - \text{H}]^-$  : 560.1901, found: 560.1904;  **$^1\text{H}$  NMR** (400 MHz, acetone- $d_6$ , ppm):  $\delta$  9.50 (br, 1H), 8.20 (br, 1H), 7.98-7.89 (m, 1H), 7.74 (d, 2H,  $J = 8.66$  Hz), 7.64 (d, 2H,  $J = 8.2$  Hz), 7.58 (d, 1H,  $J = 7.2$  Hz), 7.37 (d, 1H,  $J = 8.1$  Hz), 7.32 (d, 1H,  $J = 8.9$  Hz), 7.27-7.16 (m, 4H), 7.13 (d, 2H,  $J = 8.2$  Hz), 7.07 (d, 2H,  $J = 8.18$  Hz), 6.71 (d, 2H,  $J = 7.9$  Hz), 6.39 (s, 1H),  $\delta$  2.19 (s, 3H);  **$^{13}\text{C}$  NMR** (100 MHz, acetone- $d_6$ , ppm):  $\delta$  154.3, 153.3, 152.5, 146.3, 143.7, 136.9, 136.4, 132.7, 129.9, 129.6, 129.5, 128.4, 127.7, 127.2, 126.1, 125.9, 125.4, 124.3, 122.9, 120.1, 118.3, 117.8, 115.8, 111.1, 37.4, 33.5, 23.5, 23.4, 20.6; **HPLC analysis**: Daicel CHIRALPAK AD-H,  $n$ -hexane/ $i$ -PrOH = 90/10, flow rate = 1.0 mL/min,  $\lambda = 254$  nm, retention time:  $t_R = 5.6$  min (minor),  $t_R = 6.5$  min (major).

**(R)-N-(2-([1,1'-biphenyl]-4-yl(2-hydroxynaphthalen-1-yl)methyl)benzofuran-3-yl)-4-methylbenzenesulfonamide.**

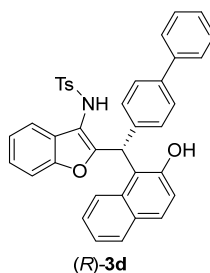

Following the *General Procedure A*, (R)-**3d** was obtained as white solid (16 h, 59.6 mg, 94% yield, 98% ee) after flash chromatography (elution gradient: ethyl

acetate/petroleum ether = 1/5);  $[\alpha]_D^{20} = -6.0$  ( $c$  1.0,  $\text{CHCl}_3$ ); m.p. 181-183 °C; **HRMS (ESI-TOF)** calcd for  $\text{C}_{38}\text{H}_{28}\text{NO}_4\text{S}$   $[\text{M} - \text{H}]^-$ : 594.1745, found: 594.1748;  **$^1\text{H}$  NMR** (400 MHz, acetone- $d_6$ , ppm):  $\delta$  9.54 (br, 1H), 8.20 (br, 1H), 7.93-7.88 (m, 1H), 7.77-7.72 (m, 2H), 7.63 (d, 4H,  $J = 8.1$  Hz), 7.58 (dd, 1H,  $J = 1.1, 7.7$  Hz), 7.36 (d, 1H,  $J = 7.92$  Hz), 7.33 (d, 1H,  $J = 8.9$  Hz), 7.25-7.16 (m, 7H), 7.10 (d, 2H,  $J = 8.1$  Hz), 6.83-6.77 (m, 2H), 6.45 (s, 1H), 2.16 (s, 3H);  **$^{13}\text{C}$  NMR** (100 MHz, acetone- $d_6$ , ppm):  $\delta$  154.0, 153.4, 152.6, 143.8, 139.8, 136.3, 132.7, 129.9, 129.6, 128.4, 127.9, 127.6, 127.2, 126.1, 125.94, 125.86, 125.4, 124.4, 122.9, 122.8, 120.1, 118.1, 117.7, 115.8, 111.1, 37.7, 20.6; **HPLC analysis**: Daicel CHIRALPAK IC,  $n$ -hexane/ $i$ -PrOH = 90/10, flow rate = 1.0 mL/min,  $\lambda = 254$  nm, retention time:  $t_R = 7.3$  min (minor),  $t_R = 8.4$  min (major).

**(*R*)-*N*-(2-((4-bromophenyl)(2-hydroxynaphthalen-1-yl)methyl)benzofuran-3-yl)-4-methylbenzenesulfonamide.**

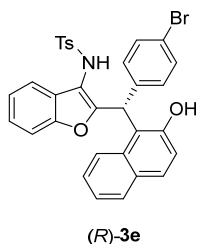

Following the *General Procedure B*, (*R*)-**3e** was obtained as white solid (12 h, 47.6 mg, 80% yield, 91% ee) after flash chromatography (elution gradient: ethyl acetate/petroleum ether = 1/5);  $[\alpha]_D^{20} = -6.2$  ( $c$  1.0,  $\text{CHCl}_3$ ); m.p. 207-209 °C; **HRMS (ESI-TOF)** calcd for  $\text{C}_{32}\text{H}_{23}\text{BrNO}_4\text{S}$   $[\text{M} - \text{H}]^-$ : 596.0537, found: 596.0535;  **$^1\text{H}$  NMR** (600 MHz, acetone- $d_6$ , ppm):  $\delta$  9.58 (br, 1H), 8.21 (br, 1H), 7.87 (d, 1H,  $J = 8.7$  Hz), 7.77-7.73 (m, 2H), 7.64 (d, 2H,  $J = 8.4$  Hz), 7.57 (d, 1H,  $J = 7.6$  Hz), 7.36-7.35 (m, 3H), 7.32 (d, 1H,  $J = 9.1$  Hz), 7.25-7.18 (m, 4H), 7.11 (d, 2H,  $J = 8.4$  Hz), 6.73 (d, 2H,  $J = 8.0$  Hz), 6.41 (s, 1H), 2.19 (s, 3H);  **$^{13}\text{C}$  NMR** (150 MHz, acetone- $d_6$ , ppm):  $\delta$  153.4, 152.7, 143.8, 139.5, 136.4, 132.5, 131.0, 129.9, 129.8, 129.7, 129.6, 128.5, 127.2, 126.0, 125.7, 125.6, 124.5, 123.0, 120.2, 119.4, 117.7, 117.6, 116.0, 111.2, 37.4, 20.6; **HPLC analysis**: Daicel CHIRALPAK IC,  $n$ -hexane/ $i$ -PrOH = 90/10, flow rate = 1.0 mL/min,  $\lambda = 254$  nm, retention time:  $t_R = 5.9$  min (minor),  $t_R = 6.6$  min (major).



**(*R*)-*N*-(2-((4-chlorophenyl)(2-hydroxynaphthalen-1-yl)methyl)benzofuran-3-yl)-4-methylbenzenesulfonamide.**

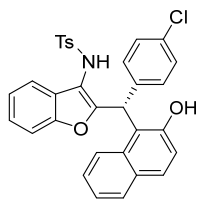

**(*R*)-3f**

Following the *General Procedure B*, (*R*)-**3f** was obtained as white solid (12 h, 46.9 mg, 88% yield, 90% ee) after flash chromatography (elution gradient: ethyl acetate/petroleum ether = 1/5);  $[\alpha]_D^{20} = -11.5$  (*c* 1.0, CHCl<sub>3</sub>); m.p. 204-206 °C; **HRMS (ESI-TOF)** calcd for C<sub>32</sub>H<sub>23</sub>ClNO<sub>4</sub>S [M - H]<sup>-</sup>: 552.1042, found: 552.1041; **<sup>1</sup>H NMR** (400 MHz, acetone-*d*<sup>6</sup>, ppm):  $\delta$  9.62 (br, 1H), 8.22 (br, 1H), 7.91-7.83 (m, 1H), 7.80-7.72 (m, 2H), 7.64 (d, 2H, *J* = 8.4 Hz), 7.60-7.51 (m, 1H), 7.37 (d, 1H, *J* = 7.9 Hz), 7.33 (d, 1H, *J* = 8.6 Hz), 7.28-7.17 (m, 6H), 7.12 (d, 2H, *J* = 8.1 Hz), 6.80 (d, 2H, *J* = 8.1 Hz), 6.43 (s, 1H), 2.19 (s, 3H); **<sup>13</sup>C NMR** (100 MHz, acetone-*d*<sup>6</sup>, ppm):  $\delta$  153.6, 153.4, 152.7, 143.8, 140.0, 136.4, 132.5, 129.9, 129.8, 129.6, 129.3, 128.5, 128.0, 127.2, 126.0, 125.7, 125.6, 125.5, 123.0, 120.1, 117.7, 117.6, 116.0, 37.3, 20.5; **HPLC analysis**: Daicel CHIRALPAK IC, *n*-hexane/*i*-PrOH = 90/10, flow rate = 1.0 mL/min,  $\lambda$  = 254 nm, retention time: *t*<sub>R</sub> = 5.7 min (minor), *t*<sub>R</sub> = 6.5 min (major).

**(*R*)-*N*-(2-((4-fluorophenyl)(2-hydroxynaphthalen-1-yl)methyl)benzofuran-3-yl)-4-methylbenzenesulfonamide.**

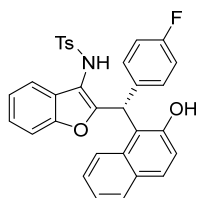

**(*R*)-3g**

Following the *General Procedure B*, (*R*)-**3g** was obtained as white solid (24 h, 50.4 mg, 94% yield, 89% ee) after flash chromatography (elution gradient: ethyl acetate/petroleum ether = 1/5);  $[\alpha]_D^{20} = -10.6$  (*c* 1.0, CHCl<sub>3</sub>); m.p. 166-168 °C; **HRMS (ESI-TOF)** calcd for C<sub>32</sub>H<sub>23</sub>FNO<sub>4</sub>S [M - H]<sup>-</sup>: 536.1330, found: 536.1339; **<sup>1</sup>H NMR** (400 MHz, acetone-*d*<sup>6</sup>, ppm):  $\delta$  9.42 (br, 1H), 8.06 (br, 1H), 7.78-7.71 (m, 1H),

7.63-7.56 (m, 2H), 7.49 (d, 2H,  $J = 8.3$  Hz), 7.44-7.40 (m, 1H), 7.21 (d, 1H,  $J = 8.3$  Hz), 7.18 (d, 2H,  $J = 8.8$  Hz), 7.11-7.01 (m, 4H), 6.96 (d, 2H,  $J = 8.0$  Hz), 6.81 (t, 2H,  $J = 8.8$  Hz), 6.71-6.64 (m, 2H), 6.29 (s, 1H), 2.03 (s, 3H);  $^{13}\text{C}$  NMR (100 MHz, acetone- $d^6$ , ppm):  $\delta$  162.4, 160.0, 153.9, 153.4, 152.6, 143.7, 136.5, 135.9 (d,  $^4J_{\text{CF}} = 3.3$  Hz), 131.2 (d,  $^1J_{\text{CF}} = 272.8$  Hz), 129.7, 129.6, 129.4 (d,  $^3J_{\text{CF}} = 8.4$  Hz), 128.5, 126.1, 127.2, 125.6, 124.5, 123.0, 122.8, 120.1, 117.9, 117.8, 115.8, 114.6 (d,  $^2J_{\text{CF}} = 21.4$  Hz), 111.2, 37.2, 20.5;  $^{19}\text{F}$  NMR (376 MHz, acetone- $d^6$ , ppm):  $\delta$  -118.6 (s); **HPLC analysis**: Daicel CHIRALPAK IC, *n*-hexane/*i*-PrOH = 90/10, flow rate = 1.0 mL/min,  $\lambda = 254$  nm, retention time:  $t_{\text{R}} = 6.0$  min (minor),  $t_{\text{R}} = 6.8$  min (major).

**(*R*)-*N*-(2-((2-hydroxynaphthalen-1-yl)(4-(trifluoromethyl)phenyl)methyl)benzofuran-3-yl)-4-methylbenzenesulfonamide.**

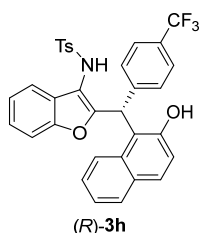

Following the *General Procedure A*, (*R*)-**3h** was obtained as white solid (24 h, 57.0 mg, 96% yield 93% ee) after flash chromatography (elution gradient: ethyl acetate/petroleum ether = 1/5);  $[\alpha]_{\text{D}}^{20} = -8.3$  ( $c$  1.0,  $\text{CHCl}_3$ ); m.p. 157-159 °C; **HRMS (ESI-TOF)** calcd for  $\text{C}_{33}\text{H}_{23}\text{F}_3\text{NO}_4\text{S}$   $[\text{M} - \text{H}]^-$ : 586.1305, found: 586.1305;  $^1\text{H}$  NMR (600 MHz, acetone- $d^6$ , ppm):  $\delta$  9.52 (br, 1H), 8.16 (br, 1H), 7.70 (d, 1H,  $J = 8.3$  Hz), 7.65-7.60 (m, 2H), 7.52 (d, 2H,  $J = 8.2$  Hz), 7.43-7.39 (m, 3H), 7.24 (d, 1H,  $J = 8.2$  Hz), 7.21 (d, 1H,  $J = 8.9$  Hz), 7.12-7.04 (m, 4H), 6.97 (d, 2H,  $J = 8.2$  Hz), 6.89 (d, 2H,  $J = 8.2$  Hz), 6.40 (s, 1H), 2.00 (s, 3H);  $^{13}\text{C}$  NMR (100 MHz, acetone- $d^6$ , ppm):  $\delta$  153.4, 153.3, 152.8, 144.9, 143.7, 136.5, 132.44, 130.0, 129.8, 129.6, 128.6, 128.3, 127.2, 126.0, 125.8, 125.4, 124.9, 124.86, 124.82 (q,  $J_{\text{CF}} = 4.1$  Hz), 124.6, 123.0, 122.9, 120.1, 117.8, 117.3, 116.2, 111.2, 37.8, 20.4;  $^{19}\text{F}$  NMR (376 MHz, acetone- $d^6$ , ppm):  $\delta$  -62.7 (s); **HPLC analysis**: Daicel CHIRALPAK IC, *n*-hexane/*i*-PrOH = 90/10, flow rate = 1.0 mL/min,  $\lambda = 254$  nm, retention time:  $t_{\text{R}} = 4.9$  min (minor),  $t_{\text{R}} = 5.4$  min (major).

**(*R*)-*N*-(2-((2-hydroxynaphthalen-1-yl)(*m*-tolyl)methyl)benzofuran-3-yl)-4-methylbenzenesulfonamide.**

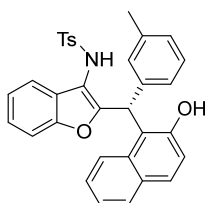

(*R*)-**3i**

Following the *General Procedure B*, (*R*)-**3i** was obtained as white solid (24 h, 48.2 mg, 90% yield, 87% ee) after flash chromatography (elution gradient: ethyl acetate/petroleum ether = 1/4);  $[\alpha]_D^{20} = -7.3$  ( $c$  1.0,  $\text{CHCl}_3$ ); m.p. 203-205 °C; **HRMS (ESI-TOF)** calcd for  $\text{C}_{33}\text{H}_{26}\text{NO}_4\text{S}$   $[\text{M} - \text{H}]^-$ : 532.1588, found: 532.1587;  **$^1\text{H}$  NMR** (600 MHz, acetone- $d_6$ , ppm):  $\delta$  9.30 (br, 1H), 8.01 (br, 1H), 7.83-7.75 (m, 1H), 7.61-7.56 (m, 2H), 7.50 (d, 2H,  $J = 8.0$  Hz), 7.46 (d, 1H,  $J = 7.6$  Hz), 7.20 (d, 1H,  $J = 8.0$  Hz), 7.18 (d, 2H,  $J = 8.8$  Hz), 7.11-7.03 (m, 4H), 6.95 (d, 2H,  $J = 8.0$  Hz), 6.90 (t, 1H,  $J = 7.6$  Hz), 6.85 (d, 1H,  $J = 7.6$  Hz), 6.58-6.40 (m, 2H), 6.26 (s, 1H), 2.06 (s, H), 2.01 (s, 3H);  **$^{13}\text{C}$  NMR** (150 MHz, acetone- $d_6$ , ppm):  $\delta$  154.1, 153.4, 152.5, 143.6, 139.8, 137.2, 136.5, 132.8, 129.9, 129.5, 129.5, 128.3, 128.2, 127.8, 127.2, 126.7, 126.2, 125.9, 125.4, 124.8, 124.3, 122.9, 122.8, 120.2, 118.3, 117.7, 115.8, 111.1, 37.7, 20.7, 20.5; **HPLC analysis**: Daicel CHIRALPAK IC,  $n$ -hexane/ $i$ -PrOH = 90/10, flow rate = 1.0 mL/min,  $\lambda = 254$  nm, retention time:  $t_R = 8.1$  min (minor),  $t_R = 10.0$  min (major).

**(*R*)-*N*-(2-((2-hydroxynaphthalen-1-yl)(3-methoxyphenyl)methyl)benzofuran-3-yl)-4-methylbenzenesulfonamide.**

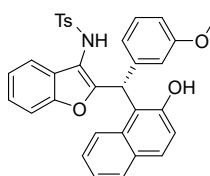

(*R*)-**3j**

Following the *General Procedure B*, (*R*)-**3j** was obtained as white solid (12 h, 53.8 mg, 98% yield, 88% ee) after flash chromatography (elution gradient: ethyl

acetate/petroleum ether = 1/5);  $[\alpha]_D^{20} = -8.2$  ( $c$  1.0,  $\text{CHCl}_3$ ); m.p. 120-122 °C; **HRMS (ESI-TOF)** calcd for  $\text{C}_{33}\text{H}_{26}\text{NO}_5\text{S}$   $[\text{M} - \text{H}]^-$  : 548.1537, found: 548.1539;  **$^1\text{H}$  NMR** (600 MHz, acetone- $d^6$ , ppm):  $\delta$  9.30 (br, 1H), 8.02 (br 1H), 7.85-7.79 (m, 1H), 7.61-7.57 (m, 2H), 7.49 (d, 2H,  $J = 8.4$  Hz), 7.46-7.42 (m, 1H), 7.22 (d, 1H,  $J = 8.4$  Hz), 7.18 (d, 2H,  $J = 8.8$  Hz), 7.11-7.04 (m, 4H), 6.95 (t, 3H,  $J = 8.0$  Hz), 6.62 (dd, 1H,  $J = 2.4, 8.0$  Hz), 6.29 (s, 1H), 6.25 (dd, 1H,  $J = 2.4, 7.6$  Hz), 6.22 (s, 1H), 3.52 (s, 3H), 2.03 (s, 3H);  **$^{13}\text{C}$  NMR** (100 MHz, acetone- $d^6$ , ppm):  $\delta$  159.6, 153.9, 152.5, 143.7, 141.4, 136.4, 132.8, 129.9, 129.5, 128.9, 128.3, 127.2, 126.1, 25.8, 125.5, 124.4, 122.9, 122.8, 120.14, 120.07, 118.2, 117.7, 115.8, 114.3, 111.1, 110.6, 54.4, 37.7, 20.5; **HPLC analysis**: Daicel CHIRALPAK IC,  $n$ -hexane/ $i$ -PrOH = 90/10, flow rate = 1.0 mL/min,  $\lambda = 254$  nm, retention time:  $t_R = 7.2$  min (minor),  $t_R = 8.2$  min (major).

**(*R*)-*N*-(2-((2-hydroxynaphthalen-1-yl)(naphthalen-2-yl)methyl)benzofuran-3-yl)-4-methylbenzenesulfonamide.**

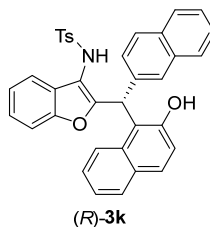

Following the *General Procedure A*, (*R*)-**3k** was obtained as white solid (36 h, 52.8 mg, 87% yield, 94% ee) after flash chromatography (elution gradient: ethyl acetate/petroleum ether = 1/5);  $[\alpha]_D^{20} = -4.5$  ( $c$  1.0,  $\text{CHCl}_3$ ); m.p. 198-200 °C; **HRMS (ESI-TOF)** calcd for  $\text{C}_{36}\text{H}_{26}\text{NO}_4\text{S}$   $[\text{M} - \text{H}]^-$  : 568.1588, found: 568.1587;  **$^1\text{H}$  NMR** (400 MHz, acetone- $d^6$ , ppm):  $\delta$  9.70 (br, 1H), 8.24 (br, 1H), 7.94 (d, 1H,  $J = 8.6$  Hz), 7.88-7.83 (m, 1H), 7.78 (d, 1H,  $J = 9.0$  Hz), 7.75 (d, 2H,  $J = 8.6$  Hz), 7.72-7.60 (m, 4H), 7.51-7.44 (m, 2H), 7.43-7.34 (m, 2H), 7.31-7.22 (m, 3H), 7.21-7.10 (m, 2H), 6.93 (d, 2H,  $J = 7.9$  Hz), 6.88 (dd, 1H,  $J = 1.4, 8.6$  Hz), 6.55 (s, 1H), 1.62 (s, 3H);  **$^{13}\text{C}$  NMR** (100 MHz, acetone- $d^6$ , ppm):  $\delta$  153.8, 153.6, 152.6, 143.7, 137.6, 136.0, 133.3, 132.8, 132.16, 129.9, 129.7, 129.4, 128.4, 127.8, 127.4, 127.7, 126.04, 126.02, 125.8, 125.5, 124.4, 123.0, 122.8, 120.3, 118.0, 117.6, 115.9, 111.3, 37.8, 19.9; **HPLC**

analysis: Daicel CHIRALPAK IC, *n*-hexane/*i*-PrOH = 90/10, flow rate = 1.0 mL/min,  $\lambda$  = 254 nm, retention time:  $t_R$  = 8.2 min (minor),  $t_R$  = 9.1 min (major).

**(*R*)-*N*-(2-((2-hydroxynaphthalen-1-yl)(phenyl)methyl)-6-methylbenzofuran-3-yl)-4-methylbenzenesulfonamide.**

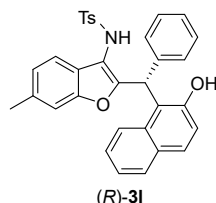

Following the *General Procedure A*, (*R*)-**3l** was obtained as white solid (36h, 43.6 mg, 82% yield, 91% ee) after flash chromatography (elution gradient: ethyl acetate/petroleum ether = 1/10;  $[\alpha]_D^{20}$  = -6.5 (*c* 1.0, CHCl<sub>3</sub>); m.p. 202-203 °C; **HRMS (ESI-TOF)** calcd for C<sub>33</sub>H<sub>26</sub>NO<sub>4</sub>S [M - H]<sup>-</sup> : 532.1588, found: 532.1587; **<sup>1</sup>H NMR** (400 MHz, acetone-*d*<sup>6</sup>, ppm):  $\delta$  9.42 (br, 1H), 8.03 (br, 1H), 7.81-7.72 (m, 1H), 7.66-7.56 (m, 2H), 7.49 (d, 2H, *J* = 8.4 Hz), 7.2 (d, 1H, *J* = 8.1 Hz), 7.20 (d, 1H, *J* = 8.9 Hz), 7.11-7.00 (m, 6H), 6.96 (d, 2H, *J* = 8.1 Hz), 6.90 (d, 1H, *J* = 8.1 Hz), 6.70-6.56 (m, 2H), 6.28 (s, 1H), 2.24 (s, 1H), 2.02 (s, 1H); **<sup>13</sup>C NMR** (100 MHz, acetone-*d*<sup>6</sup>, ppm):  $\delta$  153.8, 152.5, 143.7, 139.9, 136.3, 134.6, 132.7, 129.9, 129.6, 129.5, 128.3, 127.9, 127.6, 127.1, 126.0, 125.9, 125.3, 124.2, 123.5, 122.7, 119.7, 118.3, 117.7, 115.8, 111.3, 37.5, 20.59, 20.56; **HPLC analysis**: Daicel CHIRALPAK OD-H, *n*-hexane/*i*-PrOH = 96/4, flow rate = 1.0 mL/min,  $\lambda$  = 254 nm, retention time:  $t_R$  = 11.4 min (minor),  $t_R$  = 13.2 min (major).

**(*R*)-*N*-(2-((6'-hydroxy-[1,2'-binaphthalen]-5'-yl)(phenyl)methyl)benzofuran-3-yl)-4-methylbenzenesulfonamide.**

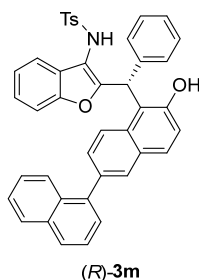

Following the *General Procedure A*, (*R*)-**3m** was obtained as white solid (20 h, 63.2

mg, 92% yield, 95% ee) after flash chromatography (elution gradient: ethyl acetate/petroleum ether = 1/4);  $[\alpha]_D^{20} = -11.3$  ( $c$  1.0,  $\text{CHCl}_3$ ); m.p. 219-220 °C; **HRMS (ESI-TOF)** calcd for  $\text{C}_{42}\text{H}_{30}\text{NO}_4\text{S}$   $[\text{M} - \text{H}]^-$  : 644.1901 , found: 644.1898.  **$^1\text{H}$  NMR** (400 MHz, acetone- $d_6$ , ppm):  $\delta$  9.60 (s, 1H), 8.26 (s, 1H), 8.07 (d, 1H,  $J = 8.9$  Hz), 7.94 (dd, 2H,  $J = 8.1, 19.9$  Hz), 7.89-7.80 (m, 3H), 7.67 (d, 2H,  $J = 8.4$  Hz), 7.62-7.48 (m, 3H), 7.47-7.35 (m, 5H), 7.87-7.16 (m, 5H), 7.13 (d, 2H,  $J = 8.1$  Hz), 6.95-6.85 (m, 3H), 6.53 (s, 1H), 2.18 (s, 3H);  **$^{13}\text{C}$  NMR** (100 MHz, acetone- $d_6$ , ppm):  $\delta$  154.1, 153.4, 152.9, 143.8, 139.8, 136.5, 135.0, 134.0, 131.9, 131.6, 129.9, 129.6, 129.2, 128.3, 128.0, 127.7, 127.6, 127.2, 127.1, 126.1, 126.15, 126.09, 125.8, 125.7, 125.6, 125.5, 124.4, 122.9, 120.1, 118.3, 118.2, 115.8, 111.2, 37.9, 20.6; **HPLC analysis**: Daicel CHIRALPAK IC,  $n$ -hexane/ $i$ -PrOH = 90/10, flow rate = 1.0 mL/min,  $\lambda = 254$  nm, retention time:  $t_R = 7.0$  min (minor),  $t_R = 7.9$  min (major).

**(*R*)-*N*-(2-((2-hydroxy-7-methoxynaphthalen-1-yl)(phenyl)methyl)benzofuran-3-yl)-4-methylbenzenesulfonamide.**

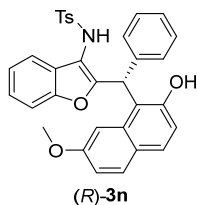

Following the *General Procedure A*, (*R*)-**3n** was obtained as white solid (40 h, 53.6 mg, 90% yield, 91% ee) after flash chromatography (elution gradient: ethyl acetate/petroleum ether = 1/5);  $[\alpha]_D^{20} = -18.6$  ( $c$  1.0,  $\text{CHCl}_3$ ); m.p. 201-203 °C; **HRMS (ESI-TOF)** calcd for  $\text{C}_{33}\text{H}_{27}\text{NO}_5\text{S}$   $[\text{M} - \text{H}]^-$  : 548.1537, found: 548.1538;  **$^1\text{H}$  NMR** (400 MHz, acetone- $d_6$ , ppm):  $\delta$  9.43 (br, 1H), 8.03 (br, 1H), 7.52-7.44 (m, 5H), 7.26 (d, 1H,  $J = 7.9$  Hz), 7.14 (s, 1H), 7.11-7.01 (m, 6H), 6.93 (d, 2H,  $J = 8.1$  Hz), 6.72-6.64 (m, 3H), 6.27 (s, 1H), 3.38 (s, 3H), 1.97 (s, 3H);  **$^{13}\text{C}$  NMR** (100 MHz, acetone- $d_6$ , ppm):  $\delta$  157.3, 154.1, 153.4, 153.1, 143.8, 139.8, 136.1, 134.0, 129.6, 129.2, 127.9, 127.6, 127.1, 126.0, 125.8, 125.1, 124.4, 123.0, 120.1, 117.6, 115.9, 115.4, 114.9, 111.2, 105.3, 54.3, 37.5, 20.5; **HPLC analysis**: Daicel CHIRALPAK AD-H,  $n$ -hexane/ $i$ -PrOH = 90/10, flow rate = 1.0 mL/min,  $\lambda = 254$  nm, retention time:

$t_R = 9.8$  min (minor),  $t_R = 11.3$  min (major).

**(*R*)-*N*-(2-((6-bromo-2-hydroxynaphthalen-1-yl)(phenyl)methyl)benzofuran-3-yl)-4-methylbenzenesulfonamide.**

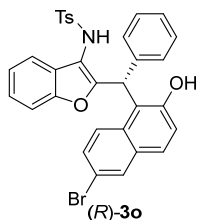

Following the *General Procedure A*, (*R*)-**3o** was obtained as white solid (41 h, 57.2 mg, 91% yield, 91% ee) after flash chromatography (elution gradient: ethyl acetate/petroleum ether = 1/5);  $[\alpha]_D^{20} = -1.6$  ( $c$  1.0,  $\text{CHCl}_3$ ); m.p. 206-208 °C; **HRMS (ESI-TOF)** calcd for  $\text{C}_{32}\text{H}_{23}\text{BrNO}_4\text{S}$   $[\text{M} - \text{H}]^-$ : 596.1537, found: 596.157;  **$^1\text{H}$  NMR** (400 MHz, acetone- $d_6$ , ppm):  $\delta$  9.73 (br, 1H), 8.22 (br, 1H), 7.97 (d, 1H,  $J = 2.2$  Hz), 7.85 (d, 1H,  $J = 9.3$  Hz), 7.76 (d, 1H,  $J = 8.9$  Hz), 7.65 (d, 2H,  $J = 8.3$  Hz), 7.55 (dd, 1H,  $J = 0.6, 7.5$  Hz), 7.40 (d, 2H,  $J = 8.9$  Hz), 7.32 (dd, 1H,  $J = 2.2, 9.3$  Hz), 7.28-7.24 (m, 1H), 7.22-7.18 (m, 4H), 7.12 (d, 2H,  $J = 8.1$  Hz), 6.81-6.79 (m, 2H), 6.50 (s, 1H), 2.18 (s, 3H);  **$^{13}\text{C}$  NMR** (100 MHz, acetone- $d_6$ , ppm):  $\delta$  153.8, 153.4, 153.2, 143.7, 140.0, 136.5, 131.3, 131.1, 130.2, 130.0, 128.8, 128.3, 128.1, 127.6, 127.2, 126.08, 126.05, 124.5, 122.9, 120.1, 119.0, 118.6, 116.0, 116.0, 111.2, 37.6, 20.6; **HPLC analysis**: Daicel CHIRALPAK IC, *n*-hexane/*i*-PrOH = 90/10, flow rate = 1.0 mL/min,  $\lambda = 254$  nm, retention time:  $t_R = 6.0$  min (minor),  $t_R = 6.7$  min (major).

**(*R*)-*N*-(2-((5-hydroxybenzo[*d*][1,3]dioxol-4-yl)(phenyl)methyl)benzofuran-3-yl)-4-methylbenzenesulfonamide.**

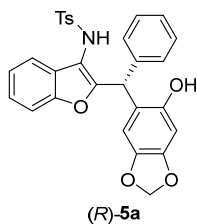

Following the *General Procedure B*, (*R*)-**5a** was obtained as white solid (24 h, 42.6 mg, 82% yield, 84% ee) after flash chromatography (elution gradient: ethyl

acetate/petroleum ether = 1/4);  $[\alpha]_D^{20} = -13.9$  ( $c$  1.0,  $\text{CHCl}_3$ ); m.p. 198-200 °C; **HRMS (ESI-TOF)** calcd for  $\text{C}_{29}\text{H}_{22}\text{NO}_6\text{S}$   $[\text{M} - \text{H}]^-$  : 512.1173 , found: 512.1174;  **$^1\text{H}$  NMR** (600 MHz, acetone- $d_6$ , ppm):  $\delta$  8.29 (br, 1H), 8.23 (br, 1H), 7.44 (d, 2H,  $J = 8.3$  Hz), 7.32-7.28 (m, 2H), 7.13-7.07 (m, 2H), 7.05-7.01 (m, 2H), 6.97 (d, 2H,  $J = 8.0$  Hz), 6.93 (d, 2H,  $J = 7.4$  Hz), 6.42 (s, 1H), 6.33 (s, 1H), 5.80 (s, 1H), 5.74-5.73 (m, 2H), 2.13 (s, 3H);  **$^{13}\text{C}$  NMR** (150 MHz, acetone- $d_6$ , ppm):  $\delta$  154.7, 153.5, 149.0, 146.7, 143.4, 140.8, 137.0, 129.4, 128.5, 127.9, 127.2, 126.3, 126.2, 124.3, 122.8, 120.1, 119.3, 114.4, 111.1, 108.7, 101.0, 97.6, 39.8, 20.6; **HPLC analysis**: Daicel CHIRALPAK IC,  $n$ -hexane/ $i$ -PrOH = 90/10, flow rate = 1.0 mL/min,  $\lambda = 254$  nm, retention time:  $t_R = 11.6$  min (minor),  $t_R = 14.5$  min (major).

## 5 General Procedure for the Asymmetric Friedel-Crafts Heteroarylation

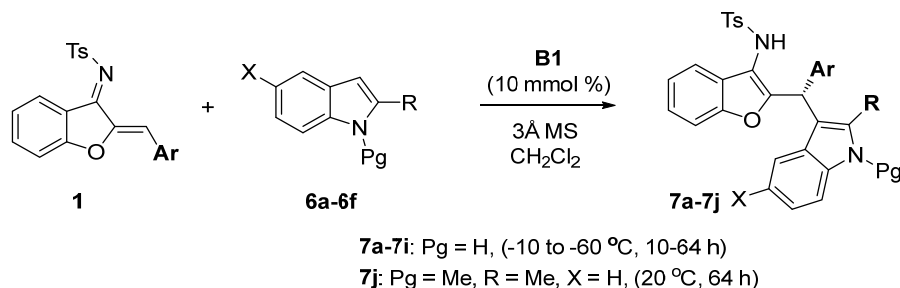

**General Procedure C:** Under argon atmosphere, 1-azadienes **1** (0.1 mmol), indole derivatives **6** (0.12 mmol), the chiral phosphoric acid **B1** (10 mmol %) and 3Å MS (50 mg) were added in the solution of  $\text{CH}_2\text{Cl}_2$  (1 mL). The reaction mixture was allowed to stir at the indicated temperature for 10 ~ 64 h. Then, the reacting mixture was directly purified by silica gel chromatography with the elution of ethyl acetate/petroleum ether = 1/4 to 1/3, affording the desired products **7**.



**(S)-4-methyl-N-(2-((2-methyl-1H-indol-3-yl)(phenyl)methyl)benzofuran-3-yl)benzenesulfonamide.**

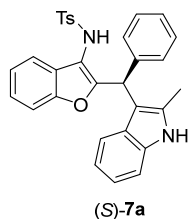

Following the *General Procedure C*, (S)-7a was obtained as yellow solid (-10 °C, 10 h, 49.6 mg, 98% yield, 92% ee) after flash chromatography (elution gradient: ethyl acetate/petroleum ether = 1/3);  $[\alpha]_D^{20} = -5.7$  (*c* 1.0, CHCl<sub>3</sub>); m.p. 108-110 °C; **HRMS (ESI-TOF)** calcd for C<sub>31</sub>H<sub>26</sub>NaN<sub>2</sub>O<sub>3</sub>S [M + Na]<sup>+</sup> : 529.1556 , found: 529.1556; **<sup>1</sup>H NMR** (400 MHz, acetone-*d*<sup>6</sup>, ppm): δ 9.85 (br, 1H), 8.51 (br, 1H), 7.54 (d, 2H, *J* = 8.1 Hz), 7.22 (d, 2H, *J* = 8.3 Hz), 7.17 (d, 2H, *J* = 8.1 Hz), 7.13-7.06 (m, 4H), 7.04-6.96 (m, 6H), 6.94-6.90 (m, 1H), 6.85-6.81 (m, 1H), 6.72-6.68 (m, 1H), 5.94 (s, 1H), 2.17 (s, 3H), 2.16 (s, 3H); **<sup>13</sup>C NMR** (100 MHz, acetone-*d*<sup>6</sup>, ppm): δ 156.6, 152.9, 143.5, 141.2, 137.9, 135.7, 133.1, 129.4, 128.3, 128.1, 127.9, 127.3, 126.3, 126.1, 124.1, 122.7, 120.3, 119.4, 119.3, 118.6, 113.9, 111.1, 110.3, 109.8, 38.3, 20.5, 11.4; **HPLC analysis**: Daicel CHIRALPAK IC, *n*-hexane/*i*-PrOH = 80/20, flow rate = 1.0 mL/min, λ = 254 nm, retention time: t<sub>R</sub> = 6.3 min (majorr), t<sub>R</sub> = 7.9 min (minor).

**(S)-N-(2-((4-methoxyphenyl)(2-methyl-1H-indol-3-yl)methyl)benzofuran-3-yl)-4-methylbenzenesulfonamide.**

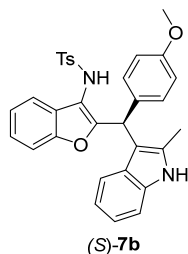

Following the *General Procedure C*, (S)-7b was obtained as yellow solid (-10 °C, 10 h, 52.5 mg, 98% yield, 93% ee) after flash chromatography (elution gradient: ethyl acetate/petroleum ether = 1/3);  $[\alpha]_D^{20} = -9.2$  (*c* 1.0, CHCl<sub>3</sub>); m.p. 141-143 °C; **HRMS (ESI-TOF)** calcd for C<sub>32</sub>H<sub>28</sub>NaN<sub>2</sub>O<sub>4</sub>S [M + Na]<sup>+</sup> : 559.1662 , found: 559.1662; **<sup>1</sup>H**

**NMR** (400 MHz, acetone- $d^6$ , ppm):  $\delta$  9.85 (br, 1H), 8.52 (s, 1H), 7.53 (d, 2H,  $J$  = 8.3 Hz), 7.23-7.20 (m, 2H), 7.12 (d, 1H,  $J$  = 8.0 Hz), 7.03-6.98 (m, 5H), 6.92-6.89 (m, 1H), 6.85-6.81 (m, 1H), 6.73-6.69 (m, 1H), 6.63-6.56 (m, 3H), 5.92 (s, 1H), 3.53 (s, 3H), 2.16 (s, 6H);  **$^{13}\text{C}$  NMR** (100 MHz, acetone- $d^6$ , ppm):  $\delta$  159.7, 156.6, 152.9, 143.5, 142.8, 137.9, 135.7, 133.1, 129.4, 128.8, 128.1, 127.2, 126.3, 124.1, 122.7, 120.7, 120.3, 119.4, 119.3, 118.6, 114.9, 113.9, 111.1, 110.9, 110.3, 109.7, 54.4, 38.3, 20.5, 11.4; **HPLC analysis**: Daicel CHIRALPAK IC, *n*-hexane/*i*-PrOH = 80/20, flow rate = 1.0 mL/min,  $\lambda$  = 254 nm, retention time:  $t_R$  = 7.3 min (major),  $t_R$  = 8.7 min (minor).

**(*S*)-*N*-(2-((4-chlorophenyl)(2-methyl-1H-indol-3-yl)methyl)benzofuran-3-yl)-4-methylbenzenesulfonamide.**

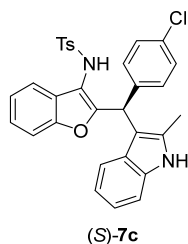

Following the *General Procedure C*, (*S*)-**7c** was obtained as yellow solid (-10 °C, 10 h, 52.8 mg, 98% yield, 90% ee) after flash chromatography (elution gradient: ethyl acetate/petroleum ether = 1/3);  $[\alpha]_D^{20}$  = -4.6 ( $c$  1.0,  $\text{CHCl}_3$ ); m.p. 120-122 °C; **HRMS (ESI-TOF)** calcd for  $\text{C}_{31}\text{H}_{25}\text{ClNaN}_2\text{O}_3\text{S}$   $[\text{M} + \text{Na}]^+$  : 563.1167, found: 563.1164;  **$^1\text{H}$  NMR** (400 MHz, acetone- $d^6$ , ppm):  $\delta$  9.88 (br, 1H), 8.57 (s, 1H), 7.53 (d, 2H,  $J$  = 8.4 Hz), 7.21 (d, 1H,  $J$  = 8.2 Hz), 7.16-7.11 (m, 4H), 7.05-6.99 (m, 4H), 6.96 (d, 2H,  $J$  = 8.4 Hz), 6.93-6.89 (m, 1H), 6.85-6.81 (m, 1H), 6.73-6.69 (m, 1H), 5.93 (s, 1H), 2.16 (s, 3H), 2.15 (s, 3H);  **$^{13}\text{C}$  NMR** (100 MHz, acetone- $d^6$ , ppm):  $\delta$  156.0, 153.0, 143.6, 140.2, 137.8, 135.7, 133.2, 131.5, 130.0, 129.5, 128.0, 127.9, 127.3, 126.2, 124.3, 122.8, 120.5, 119.4, 119.1, 118.8, 114.1, 111.2, 110.4, 109.4, 37.8, 20.6, 11.4; **HPLC analysis**: Daicel CHIRALPAK IC, *n*-hexane/*i*-PrOH = 80/20, flow rate = 1.0 mL/min,  $\lambda$  = 254 nm, retention time:  $t_R$  = 5.4 min (major),  $t_R$  = 6.4 min (minor).

**(S)-N-(2-((3-chlorophenyl)(2-methyl-1H-indol-3-yl)methyl)benzofuran-3-yl)-4-methylbenzenesulfonamide.**

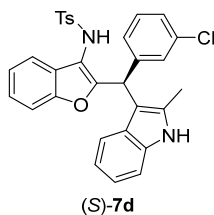

Following the *General Procedure C*, (S)-7d was obtained as yellow solid (-10 °C, 10 h, 53.4 mg, 98% yield, 95% ee) after flash chromatography (elution gradient: ethyl acetate/petroleum ether = 1/3);  $[\alpha]_D^{20} = -15.1$  (*c* 1.0, CHCl<sub>3</sub>); m.p. 145-147 °C; **HRMS (ESI-TOF)** calcd for C<sub>31</sub>H<sub>25</sub>ClNaN<sub>2</sub>O<sub>3</sub>S [M + Na]<sup>+</sup>: 563.1167, found: 563.1166; **<sup>1</sup>H NMR** (400 MHz, acetone-*d*<sup>6</sup>, ppm): δ 9.92 (br, 1H), 8.61 (s, 1H), 7.55 (d, 2H, *J* = 8.1 Hz), 7.24 (d, 1H, *J* = 8.1 Hz), 7.18-7.07 (m, 4H), 7.05-7.01 (m, 4H), 6.96-6.91 (m, 3H), 6.86-6.83 (m, 1H), 6.74-6.71 (m, 1H), 5.94 (s, 1H), 2.18 (s, 3H), 2.15 (s, 3H); **<sup>13</sup>C NMR** (100 MHz, acetone-*d*<sup>6</sup>, ppm): δ 155.7, 153.0, 143.8, 143.6, 137.8, 135.7, 133.4, 133.3, 129.6, 129.5, 128.2, 127.8, 126.9, 126.3, 126.2, 124.3, 122.8, 120.5, 119.5, 119.1, 118.8, 114.3, 111.2, 110.5, 109.1, 38.1, 20.6, 11.4; **HPLC analysis**: Daicel CHIRALPAK IC, *n*-hexane/*i*-PrOH = 80/20, flow rate = 1.0 mL/min, λ = 254 nm, retention time: *t*<sub>R</sub> = 5.4 min (major), *t*<sub>R</sub> = 6.6 min (minor).

**(S)-4-methyl-N-(2-((2-methyl-1H-indol-3-yl)(thiophen-2-yl)methyl)benzofuran-3-yl)benzenesulfonamide.**

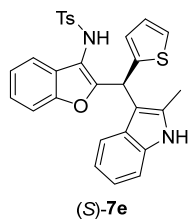

Following the *General Procedure C*, (S)-7e was obtained as yellow solid (-60 °C, 20 h, 45.3 mg, 88% yield, 92% ee) after flash chromatography (elution gradient: ethyl acetate/petroleum ether = 1/3);  $[\alpha]_D^{20} = +6.0$  (*c* 1.0, CHCl<sub>3</sub>); m.p. 128-130 °C; **HRMS (ESI-TOF)** calcd for C<sub>29</sub>H<sub>24</sub>NaN<sub>2</sub>O<sub>3</sub>S<sub>2</sub> [M + Na]<sup>+</sup>: 535.1121, found: 535.1118; **<sup>1</sup>H NMR** (400 MHz, acetone-*d*<sup>6</sup>, ppm): δ 9.89 (br, 1H), 8.52 (s, 1H), 7.53 (d, 2H, *J* = 8.3

Hz), 7.39 (d, 1H,  $J = 8.0$  Hz), 7.26 (d, 1H,  $J = 8.1$  Hz), 7.13-7.11 (m, 2H), 7.07-7.03 (m, 3H), 6.95-6.94 (m, 1H), 6.92-6.88 (m, 1H), 6.86-6.83 (m, 1H), 6.77-6.74 (m, 2H), 6.59-6.56 (m, 1H), 6.14 (s, 1H), 2.26 (s, 3H), 2.17 (s, 3H);  $^{13}\text{C}$  NMR (100 MHz, acetone- $d_6$ , ppm):  $\delta$  156.0, 152.9, 145.3, 143.6, 137.8, 135.6, 133.0, 129.5, 127.7, 127.2, 126.2, 126.1, 125.4, 124.3, 124.2, 122.7, 120.4, 119.33, 119.30, 118.7, 113.4, 111.2, 110.3, 110.2; **HPLC analysis**: Daicel CHIRALPAK IC, *n*-hexane/*i*-PrOH = 80/20, flow rate = 1.0 mL/min,  $\lambda = 254$  nm, retention time:  $t_R = 6.7$  min (major),  $t_R = 8.3$  min (minor).

**(S)-4-methyl-N-(2-(phenyl(2-phenyl-1H-indol-3-yl)methyl)benzofuran-3-yl)-benzenesulfonamide.**

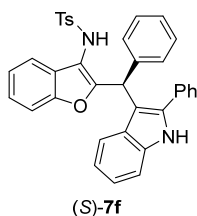

Following the *General Procedure C*, (*R*)-**7f** was obtained as yellow solid (-40 °C, 64 h, 51.1 mg, 90% yield, 89% ee) after flash chromatography (elution gradient: ethyl acetate/petroleum ether = 1/4);  $[\alpha]_D^{20} = +13.5$  ( $c$  1.0,  $\text{CHCl}_3$ ); m.p. 126-128 °C; **HRMS (ESI-TOF)** calcd for  $\text{C}_{29}\text{H}_{24}\text{NaN}_2\text{O}_3\text{S}_2$   $[\text{M} + \text{Na}]^+$  : 591.1713 , found: 591.1709;  $^1\text{H}$  NMR (400 MHz, acetone- $d_6$ , ppm):  $\delta$  10.31 (br, 1H)  $\delta$  8.11 (s, 1H), 7.53-7.51 (m, 2H), 7.41-7.37 (m, 3H), 7.35-7.32 (m, 3H), 7.27-7.21 (m, 2H), 7.06-7.03 (m, 5H), 7.00-6.98 (m, 2H), 6.94-6.91 (m, 2H), 6.86-6.95 (m, 2H), 6.76-6.93 (m, 1H), 5.84 (s, 1H), 2.17 (s, 3H);  $^{13}\text{C}$  NMR (100 MHz, acetone- $d_6$ , ppm):  $\delta$  156.5, 152.9, 143.5, 141.2, 137.6, 136.8, 136.7, 132.8, 129.5, 128.7, 128.3, 128.1, 127.9, 127.8, 127.3, 126.3, 126.2, 124.2, 122.7, 121.6, 121.1, 119.4, 119.2, 114.1, 111.2, 111.1, 110.8, 38.8, 20.6; **HPLC analysis**: Daicel CHIRALPAK IC, *n*-hexane/*i*-PrOH = 80/20, flow rate = 1.0 mL/min,  $\lambda = 254$  nm, retention time:  $t_R = 6.7$  min (major),  $t_R = 8.0$  min (minor).

**(S)-N-(2-(((1H-indol-3-yl)(phenyl)methyl)benzofuran-3-yl)-4-methylbenzenesulfonamide.**

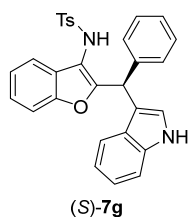

Following the *General Procedure C*, (S)-**7g**<sup>[4]</sup> was obtained as pink solid (-20 °C, 12 h, 48.7 mg, 99% yield, 96% ee) after flash chromatography (elution gradient: ethyl acetate/petroleum ether = 1/4);  $[\alpha]_{\text{D}}^{20} = -11.1$  (*c* 1.0, CHCl<sub>3</sub>);  $[\alpha]_{\text{D}}^{20} = +13.5$  (*c* 1.0, ethyl acetate); m.p. 109-111 °C; **HRMS (ESI-TOF)** calcd for C<sub>30</sub>H<sub>24</sub>KN<sub>2</sub>O<sub>3</sub>S [M + K]<sup>+</sup>: 531.1139, found: 512.1133; **<sup>1</sup>H NMR** (400 MHz, acetone-*d*<sup>6</sup>, ppm):  $\delta$  9.98 (br, 1H), 8.68 (s, 1H), 7.47 (d, 2H, *J* = 8.2 Hz), 7.30- 7.24 (m, 3H), 7.08-7.00 (m, 8H), 6.94 (t, 1H, *J* = 7.5 Hz), 6.89(d, 2H, *J* = 8.0 Hz), 6.82 (d, 1H, *J* = 1.9 Hz), 6.77 (t, 1H, *J* = 7.5 Hz), 5.73 (s, 1H), 2.03 (s, 3H); **<sup>13</sup>C NMR** (100 MHz, acetone-*d*<sup>6</sup>, ppm):  $\delta$  155.4, 153.3, 143.5, 141.1, 137.4, 136.8, 129.4, 128.5, 128.0, 127.2, 126.8, 126.4, 124.2, 123.7, 122.7, 121.4, 120.1, 119.2, 118.7, 114.9, 113.5, 111.4, 111.1, 39.2, 20.5; **HPLC analysis**: Daicel CHIRALPAK IC, *n*-hexane/*i*-PrOH = 90/10, flow rate = 1.0 mL/min,  $\lambda$  = 254 nm, retention time: *t*<sub>R</sub> = 15.6 min (major), *t*<sub>R</sub> = 17.9 min (minor).

**(S)-N-(2-(((5-methoxy-1H-indol-3-yl)(phenyl)methyl)benzofuran-3-yl)-4-methyl-benzenesulfonamide.**

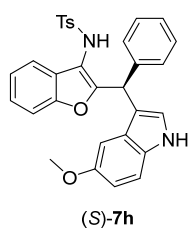

Following the *General Procedure C*, (S)-**7h** was obtained as white solid (-20 °C, 12 h, 51.4 mg, 98% yield, 93% ee) after flash chromatography (elution gradient: ethyl acetate/petroleum ether = 1/4);  $[\alpha]_{\text{D}}^{20} = -7.9$  (*c* 1.0, CHCl<sub>3</sub>); m.p. 127-129 °C; **HRMS (ESI-TOF)** calcd for C<sub>31</sub>H<sub>26</sub>N<sub>2</sub>NaO<sub>4</sub>S [M + Na]<sup>+</sup>: 545.1505, found: 545.1506; **<sup>1</sup>H**

**NMR** (400 MHz, acetone- $d^6$ , ppm):  $\delta$  9.81 (br, 1H), 8.62 (s, 1H), 7.47 (d, 2H,  $J$  = 8.3 Hz), 7.24-7.21 (m, 2H), 7.16-7.03 (m, 7H), 6.99-6.95 (m, 1H), 6.89 (d, 2H,  $J$  = 8.1 Hz), 6.78 (d, 1H,  $J$  = 2.4 Hz), 6.62-6.59 (m, 2H), 5.71 (s, 1H), 3.50 (s, 3H), 2.03 (s, 3H);  **$^{13}\text{C}$  NMR** (100 MHz, acetone- $d^6$ , ppm):  $\delta$  155.7, 153.8, 153.3, 143.5, 141.1, 137.5, 131.9, 129.4, 128.6, 128.0, 127.2, 126.4, 124.4, 124.2, 122.7, 119.9, 114.6, 113.6, 112.0, 111.4, 111.1, 101.3, 54.9, 39.2, 20.5; **HPLC analysis**: Daicel CHIRALPAK IC, *n*-hexane/*i*-PrOH = 85/15, flow rate = 1.0 mL/min,  $\lambda$  = 254 nm, retention time:  $t_R$  = 14.6 min (major),  $t_R$  = 16.6 min (minor).

**(*S*)-*N*-(2-((5-bromo-1H-indol-3-yl)(phenyl)methyl)benzofuran-3-yl)-4-methyl-benzenesulfonamide.**

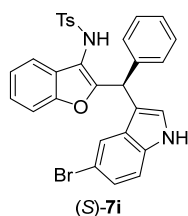

Following the *General Procedure C*, (*S*)-**7i** was obtained as yellow solid (12 h, 54.7 mg, 96% yield, 94% ee) after flash chromatography (elution gradient: ethyl acetate/petroleum ether = 1/4);  $[\alpha]_D^{20}$  = -13.3 (*c* 1.0,  $\text{CHCl}_3$ ); m.p. 137-139 °C; **HRMS (ESI-TOF)** calcd for  $\text{C}_{30}\text{H}_{23}\text{BrN}_2\text{NaO}_3\text{S}$   $[\text{M} + \text{Na}]^+$  : 593.0503, found: 593.0508;  **$^1\text{H}$  NMR** (400 MHz, acetone- $d^6$ , ppm):  $\delta$  10.18 (br, 1H), 8.68 (s, 1H), 7.46 (d, 2H,  $J$  = 7.9 Hz), 7.29-7.22 (m, 4H), 7.08-7.04 (m, 7H), 7.01-6.97 (m, 1H), 6.01-6.85 (m, 3H), 5.71 (s, 1H), 2.00 (s, 3H);  **$^{13}\text{C}$  NMR** (100 MHz, acetone- $d^6$ , ppm):  $\delta$  155.0, 153.3, 143.5, 140.8, 137.4, 135.4, 129.3, 128.6, 128.4, 128.2, 127.2, 126.7, 126.4, 125.5, 124.3, 124.1, 122.8, 121.6, 120.1, 114.7, 113.7, 113.3, 111.8, 111.1, 39.0, 20.5; **HPLC analysis**: Daicel CHIRALPAK IA, *n*-hexane/*i*-PrOH = 80/20, flow rate = 1.0 mL/min,  $\lambda$  = 254 nm, retention time:  $t_R$  = 8.1 min (major),  $t_R$  = 9.8 min (minor).

**(S)-N-(2-((1,2-dimethyl-1H-indol-3-yl)(phenyl)methyl)benzofuran-3-yl)-4-methylbenzenesulfonamide**

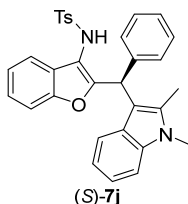

Following the *General Procedure C*, (S)-7j was obtained as white solid (64 h, 44.2 mg, 85% yield, 29% ee) after flash chromatography (elution gradient: ethyl acetate/petroleum ether = 1/3);  $[\alpha]_D^{20} = -8.3$  ( $c$  1.0,  $\text{CHCl}_3$ ); m.p. 126-128 °C; **HRMS (ESI-TOF)** calcd for  $\text{C}_{32}\text{H}_{26}\text{NaN}_2\text{O}_3\text{S}$   $[\text{M} + \text{Na}]^+$  : 543.1748 , found: 543.1750;  **$^1\text{H}$  NMR** (400 MHz, acetone- $d_6$ , ppm):  $\delta$  8.45 (s, 1H), 7.53 (d, 2H,  $J = 8.13$  Hz), 7.20 (t, 2H,  $J = 7.2$  Hz), 7.12 (d, 1H,  $J = 8.3$  Hz), 7.07-7.00 (m, 6H), 6.95 (d, 3H,  $J = 8.0$  Hz), 6.88 (t, 2H,  $J = 7.2$  Hz), 6.71 (t, 2H,  $J = 7.4$  Hz), 6.00 (s, 1H), 3.50 (s, 3H), 2.20 (s, 3H), 2.14 (s, 3H);  **$^{13}\text{C}$  NMR** (100 MHz, acetone- $d_6$ , ppm):  $\delta$  156.8, 152.9, 143.5, 141.2, 138.0, 136.9, 134.6, 129.5, 128.2, 127.9, 127.3, 127.2, 126.3, 126.1, 124.1, 122.7, 120.3, 119.5, 119.3, 118.6, 114.0, 111.1, 109.7, 108.7, 38.5, 28.9, 20.6, 10.0; **HPLC analysis**: Daicel CHIRALPAK IC,  $n$ -hexane/ $i$ -PrOH = 85/15, flow rate = 1.0 mL/min,  $\lambda = 254$  nm, retention time:  $t_R = 10.9$  min (minor),  $t_R = 12.3$  min (major).

## 6 General Procedure for the Gram-Scale Syntheses

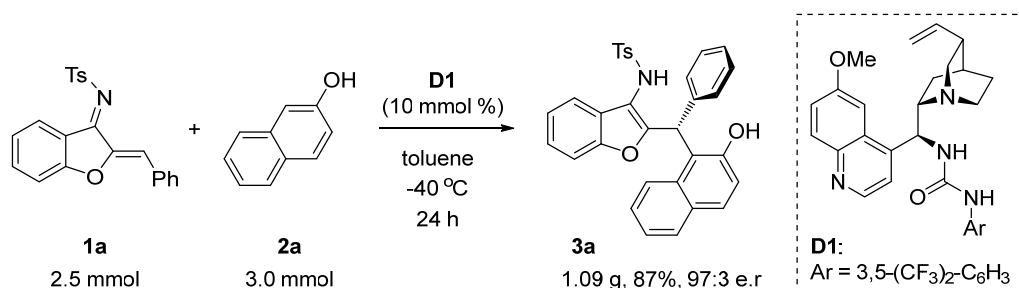

**General Procedure for the Gram-Scale Synthesis of 3a:** Under argon atmosphere, 1-azadienes **1a** (0.938 g, 2.5 mmol),  $\beta$ -naphthol **2a** (0.433 g, 3.0 mmol) and the chiral urea catalyst **D1** (144.5 mg, 10 mmol %) was dissolved in toluene (50 mL) at  $-40^\circ\text{C}$ . The reaction mixture was allowed to stir at  $-40^\circ\text{C}$  for 24 h. Then, the reacting mixture was concentrated, and the residues were purified by silica gel chromatography (ethyl

acetate/petroleum ether =1/5) to yield the desired product **3a** (1.09 g) in 87% yield and 97:3 er. **HPLC analysis:** Daicel CHIRALCEL OD-H, *n*-hexane/*i*-PrOH = 85/15, flow rate = 1.0 mL/min,  $\lambda$  = 230 nm, retention time:  $t_R$  = 5.3 min (major),  $t_R$  = 6.3 min (minor).

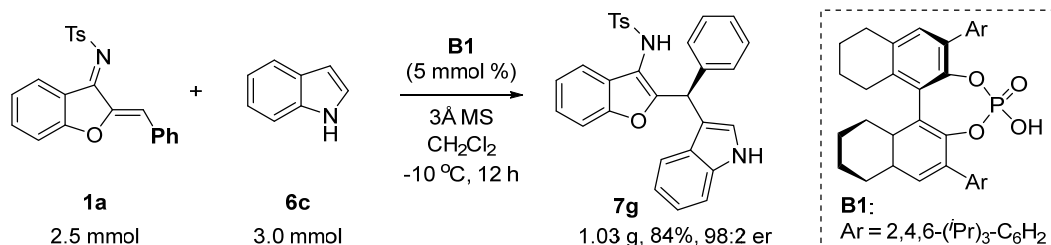

**General Procedure for the Gram-Scale Synthesis of 7g:** Under argon atmosphere, the solution of  $\alpha,\beta$ -unsaturated imine **1a** (0.938 g, 2.5 mmol) and indole derivatives **6c** (0.351 g, 3.0 mmol) in CH<sub>2</sub>Cl<sub>2</sub> (50 mL) was added 3Å MS (1.25 g) and chiral phosphoric acid **B1** (95.5 mg, 5 mmol %). The reaction mixture was allowed to stir at -10 °C for 12 h. Then, the reacting mixture was concentrated, and the residues were purified by silica gel chromatography (ethyl acetate/petroleum ether =1/3) to yield the desired product **7g** (1.03 g) in 84% yield and 98:2 er. **HPLC analysis:** Daicel CHIRALPAK IC, *n*-hexane/*i*-PrOH = 90/10, flow rate = 1.0 mL/min,  $\lambda$  = 254 nm, retention time:  $t_R$  = 15.5 min (major),  $t_R$  = 17.7 min (minor).

## 7 General Procedure of the Protection for 3a

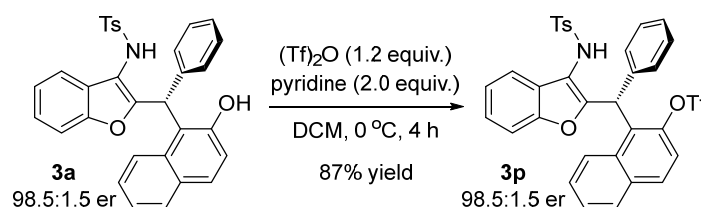

Under argon atmosphere, Trifluoromethanesulfonic anhydride (0.12 mmol) was added to solution of **3a** (0.1 mmol, 98.5:1.5 er, after once recrystallization from the gram-scale synthesis) and pyridine (0.2 mmol) in DCE (2 mL) at ice bath. When the reaction finish, the resolution was then quenched with 10% HCl and extracted with



DCE. The combined organic phases were dried over Na<sub>2</sub>SO<sub>4</sub> and concentrated. The residue was purified by flash chromatography on silica gel with the elution of DCM:petroleum ether = 1:1 to afford **3p** as white solid (4 h, 74.8 mg, 87% yield, 97% ee).

**(R)-1-((3-((4-methylphenyl)sulfonamido)benzofuran-2-yl)(phenyl)methylnaphthalen-2-yl trifluoromethanesulfonate (3p):**  $[\alpha]_D^{20} = -12.6$  ( $c$  1.0, CHCl<sub>3</sub>); m.p. 232-234 °C; **HRMS (ESI-TOF)** calcd for C<sub>32</sub>H<sub>23</sub>F<sub>3</sub>NO<sub>6</sub>S<sub>2</sub> [M - H]<sup>-</sup> : 650.0997, found: 650.0836; **<sup>1</sup>H NMR** (400 MHz, CDCl<sub>3</sub>, ppm):  $\delta$  8.12 (d, 1H,  $J$  = 8.8 Hz), 7.86 (d, 1H,  $J$  = 9.2 Hz) 7.82 (d, 1H,  $J$  = 8.2 Hz), 7.65 (d, 2H,  $J$  = 8.2 Hz), 7.50-7.36 (m, 4H), 7.29-7.13 (m, 6H), 6.98 (d, 2H,  $J$  = 7.9 Hz), 6.78 (d, 2H,  $J$  = 7.2 Hz), 6.45 (s, 1H), 6.31 (s, 1H), 2.21 (s, 3H); **<sup>13</sup>C NMR** (100 MHz, CDCl<sub>3</sub>, ppm):  $\delta$  153.4, 152.2, 146.4, 143.8, 139.0, 136.1, 133.3, 131.0, 129.5, 128.6, 128.3, 128.1, 127.6, 127.5, 127.4, 126.9, 126.7, 126.6, 125.8, 124.9, 123.4, 120.1, 118.1, 116.9, 115.7, 111.7, 39.5, 21.5, **<sup>19</sup>F NMR** (376 MHz, CDCl<sub>3</sub>, ppm): -73.4, **HPLC analysis:** Daicel CHIRALCEL AD-H, *n*-hexane/*i*-PrOH = 90/10, flow rate = 1.0 mL/min,  $\lambda$  = 254 nm, retention time:  $t_R$  = 30.8 min (major),  $t_R$  = 27.6 min (minor).

## 8 Assignment of Absolute Configuration for Products

**Experimental:** Single crystals of C<sub>32</sub>H<sub>25</sub>NO<sub>4</sub>S (**3a**) were obtained from *n*-Hexanes and DCM. A suitable crystal was selected and measured on a diffractometer. The crystal was kept at 298(2) K during data collection.

**Crystal Data** for C<sub>32</sub>H<sub>25</sub>NO<sub>4</sub>S (**3a**) ( $M$  = 519.59 g/mol): orthorhombic, space group P2<sub>1</sub>2<sub>1</sub>2<sub>1</sub> (no. 19),  $a$  = 9.778(7) Å,  $b$  = 15.230(11) Å,  $c$  = 17.325(12) Å,  $V$  = 2580(3) Å<sup>3</sup>,  $Z$  = 4,  $T$  = 298(2) K,  $\mu$ (MoK $\alpha$ ) = 0.165 mm<sup>-1</sup>,  $D_{\text{calc}}$  = 1.338 g/cm<sup>3</sup>, 14848 reflections measured ( $3.56^\circ \leq 2\theta \leq 50.298^\circ$ ), 4625 unique ( $R_{\text{int}}$  = 0.0511,  $R_{\text{sigma}}$  = 0.0546) which were used in all calculations. The final  $R_1$  was 0.0432 ( $I > 2\sigma(I)$ ) and  $wR_2$  was 0.1137 (all data).

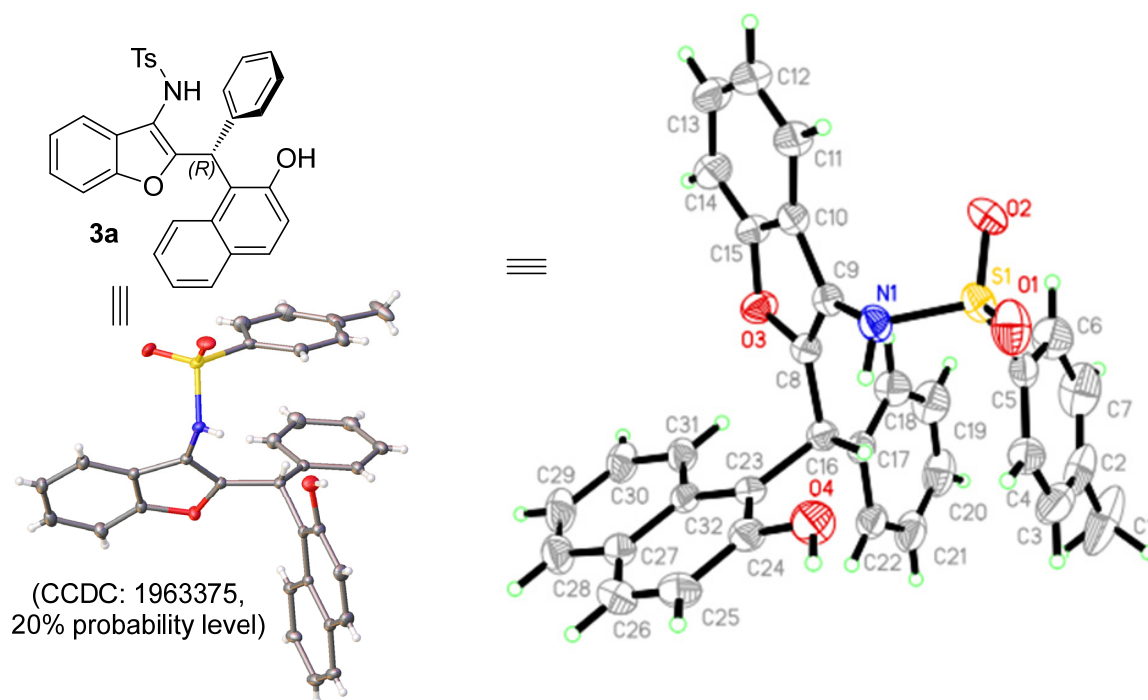

**Figure S2.** View of **3a**.

**Table S4.** Crystal data and structure refinement for **3a**.

|                       |                                                   |
|-----------------------|---------------------------------------------------|
| Identification code   | <b>3a</b>                                         |
| Empirical formula     | C <sub>32</sub> H <sub>25</sub> NO <sub>4</sub> S |
| Formula weight        | 519.59                                            |
| Temperature/K         | 298(2)                                            |
| Crystal system        | orthorhombic                                      |
| Space group           | P2 <sub>1</sub> 2 <sub>1</sub> 2 <sub>1</sub>     |
| a/Å                   | 9.778(7)                                          |
| b/Å                   | 15.230(11)                                        |
| c/Å                   | 17.325(12)                                        |
| α/°                   | 90                                                |
| β/°                   | 90                                                |
| γ/°                   | 90                                                |
| Volume/Å <sup>3</sup> | 2580(3)                                           |
| Z                     | 4                                                 |

|                                             |                                                               |
|---------------------------------------------|---------------------------------------------------------------|
| $\rho$ calcg/cm <sup>3</sup>                | 1.338                                                         |
| $\mu$ /mm <sup>-1</sup>                     | 0.165                                                         |
| F(000)                                      | 1088.0                                                        |
| Crystal size/mm <sup>3</sup>                | 0.350 × 0.310 × 0.250                                         |
| Radiation                                   | MoK $\alpha$ ( $\lambda$ = 0.71073)                           |
| 2 $\Theta$ range for data collection/°      | 3.56 to 50.298                                                |
| Index ranges                                | -10 ≤ h ≤ 11, -18 ≤ k ≤ 18, -20 ≤ l ≤ 17                      |
| Reflections collected                       | 14848                                                         |
| Independent reflections                     | 4625 [R <sub>int</sub> = 0.0511, R <sub>sigma</sub> = 0.0546] |
| Data/restraints/parameters                  | 4625/0/346                                                    |
| Goodness-of-fit on F <sup>2</sup>           | 0.976                                                         |
| Final R indexes [I ≥ 2 $\sigma$ (I)]        | R <sub>1</sub> = 0.0432, wR <sub>2</sub> = 0.0956             |
| Final R indexes [all data]                  | R <sub>1</sub> = 0.0735, wR <sub>2</sub> = 0.1137             |
| Largest diff. peak/hole / e Å <sup>-3</sup> | 0.14/-0.22                                                    |
| <b>Flack parameter</b>                      | <b>0.02(12)</b>                                               |

---

## 9 References

- [1] (a) Z. Shi, Q. Tong, W. W. Y. Leong, and G. Zhong, *Chem.-Eur. J.* 2012, **18**, 9802-9806; (b) Y.-G. Zhou, Z. Gu, J.-J. Xie, and G.-F. Jiang, *Asian J. Org. Chem.* 2018, **7**, 1561-1564.
- [2] M. Wang, Z.-Q. Rong, and Y. Zhao, *Chem. Comm.* 2014, **50**, 15309-15312.
- [3] Q. Yin, S. G. Wang, X. W. Liang, D. W. Gao, J. Zheng and S-L. You, *Chem. Sci.*, 2015, **6**, 4179-4183.
- [4] H.-P. Xie, B. Wu, X.-W. Wang and Y.-G. Zhou, *Chin. J. Catal.* **2019**, **40**, 1566-1575.

## 10 Copies of NMR and HPLC Spectrums

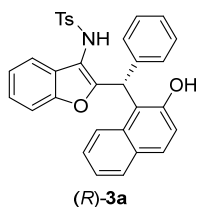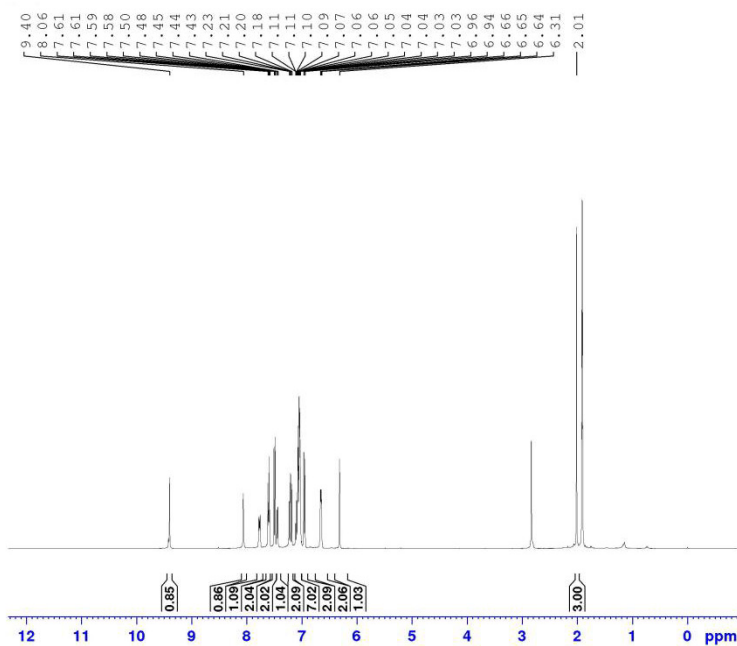

```
Current Data Parameters
NAME      R-17
EXPNO     223
PROCNO    1

F2 - Acquisition Parameters
Date_     20190419
Time      8.07
INSTRUM   spect
PROBHD     5 mm PABBO BB/
PULPROG    zg30
TD         65536
SOLVENT    Acetone
NS          8
DS          0
SWH        8012.820 Hz
FIDRES     0.122266 Hz
AQ         4.0894465 sec
RG         52.37
SW         62.400 usec
DE         6.50 usec
TE         295.1 K
D1         1.00000000 sec
TD0        1

===== CHANNEL f1 =====
SF01      400.1522058 MHz
NUC1       1H
P1         10.75 usec
PLM1       17.50000000 W

F2 - Processing parameters
SI         65536
SF         400.1500640 MHz
WDW        EM
SSB         0
LB          0.30 Hz
GB          0
PC          1.00
```

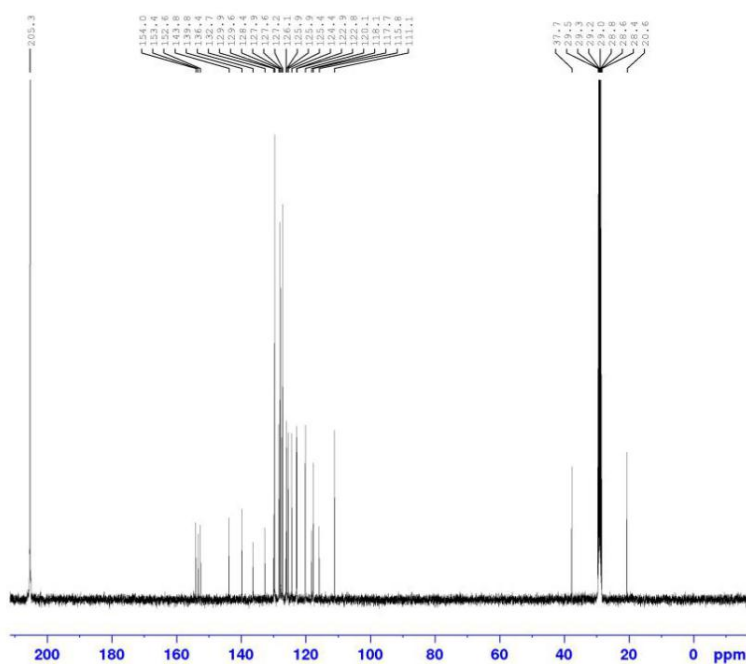

```
Current Data Parameters
NAME      R-17
EXPNO     224
PROCNO    1

F2 - Acquisition Parameters
Date_     20190419
Time      8.30
INSTRUM   spect
PROBHD     5 mm PABBO BB/
PULPROG    zgpg30
TD         65536
SOLVENT    Acetone
NS          447
DS          0
SWH        25252.525 Hz
FIDRES     0.385323 Hz
AQ         1.2976128 sec
RG         195.85
DW         19.800 usec
DE         6.50 usec
TE         295.3 K
D1         2.00000000 sec
D11        0.03000000 sec
TD0        1

===== CHANNEL f1 =====
SF01      100.6283629 MHz
NUC1       13C
P1         10.50 usec
PLM1       74.00000000 W

===== CHANNEL f2 =====
SF02      400.1516006 MHz
NUC2       1H
CPDPRG[2] waltz16
PCPD2     90.00 usec
PLM2      17.50000000 W
PLM12     0.26142001 W
PLM13     0.13149001 W

F2 - Processing parameters
SI         32768
SF         100.6177980 MHz
WDW        EM
SSB         0
LB          1.00 Hz
GB          0
PC          1.40
```

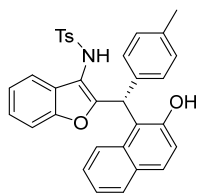

(R)-3b

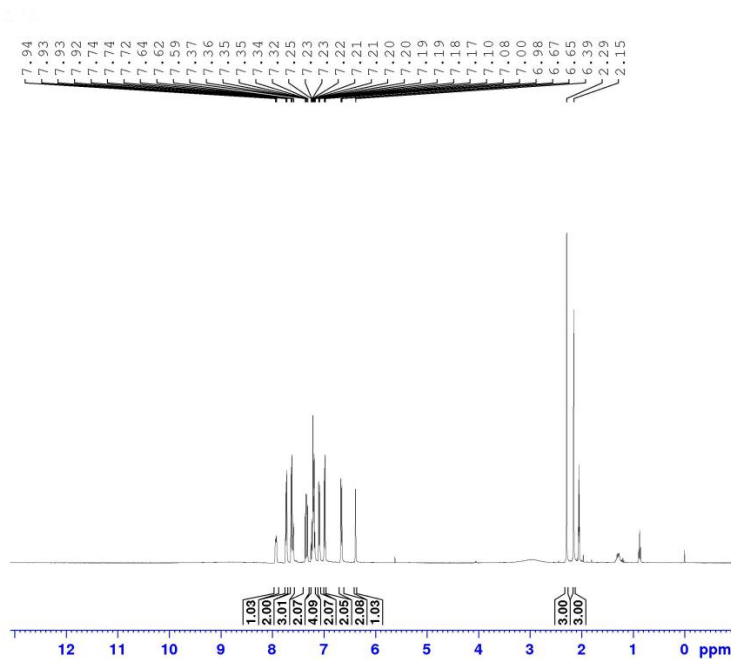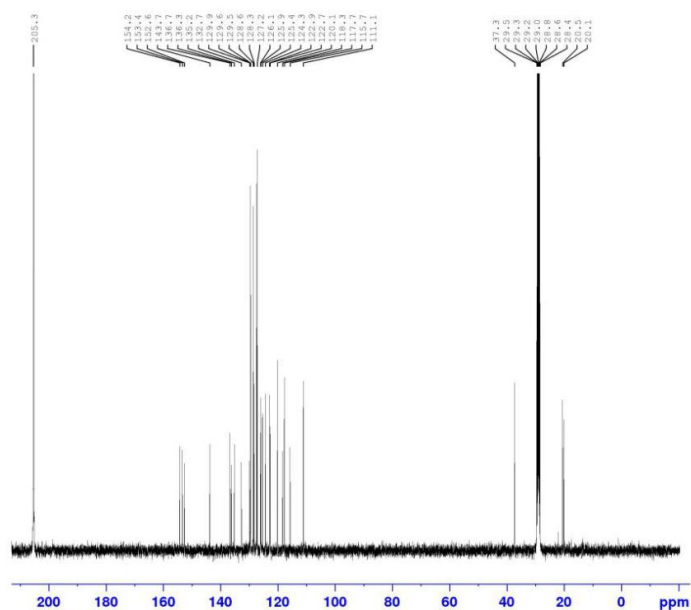

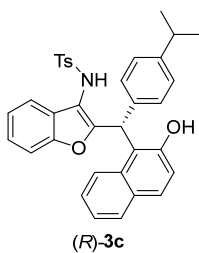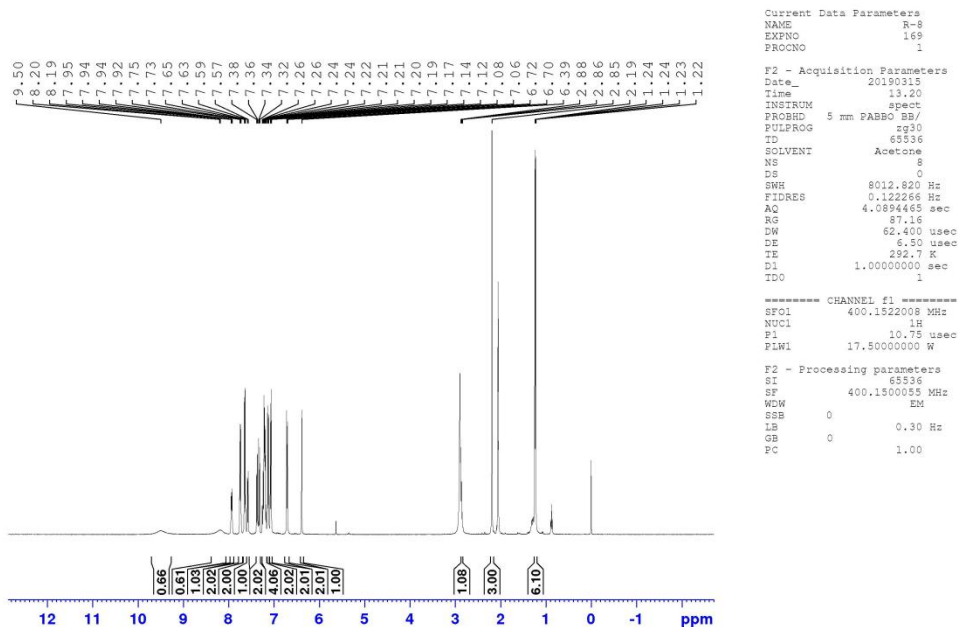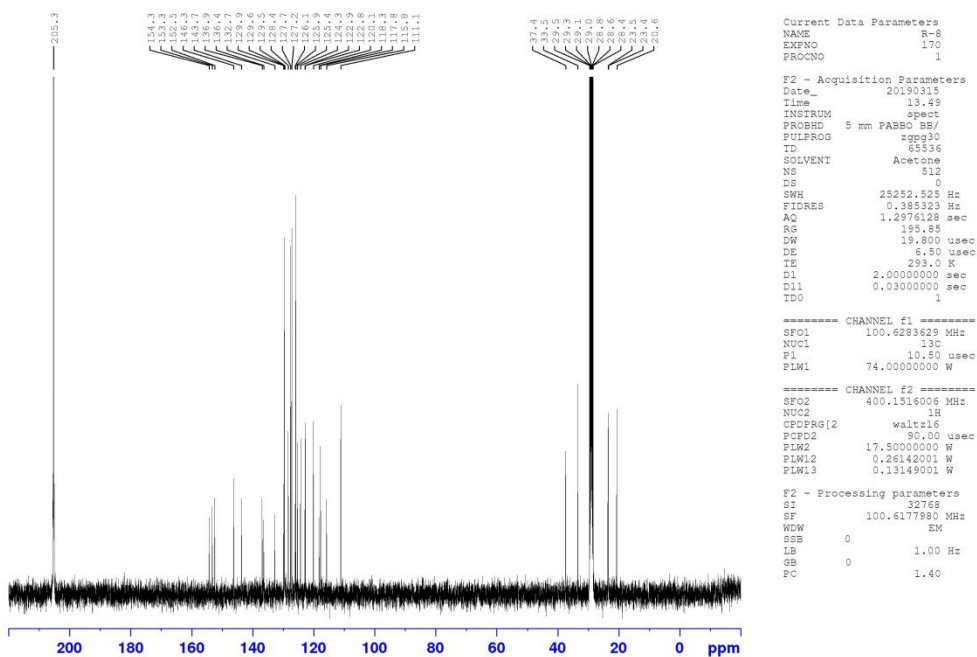

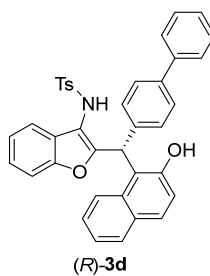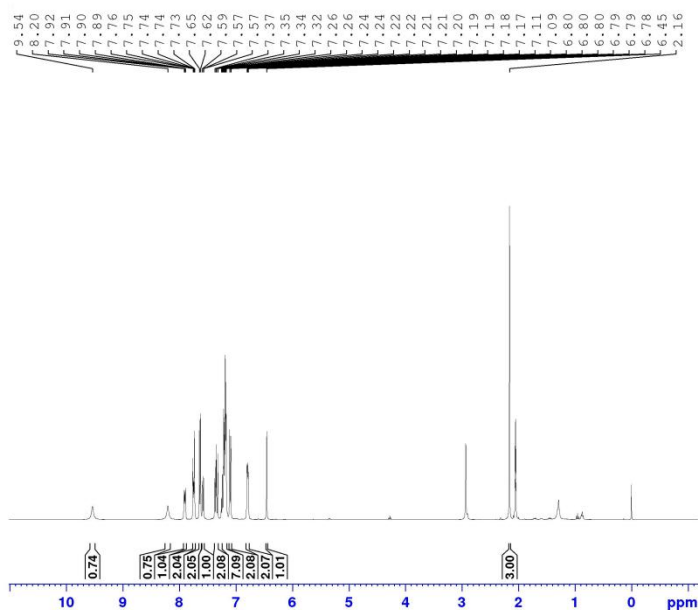

```

Current Data Parameters
NAME      R-7
EXPNO    175
PROCNO    1

F2 - Acquisition Parameters
Date_     20190317
Time      1.33
INSTRUM   spect
PROBHD    5 mm PABBO BB/
PULPROG   zg30
TD         65536
SOLVENT   Acetone
NS         8
DS         0
SWH        8012.820 Hz
FIDRES     0.122256 Hz
AQ         4.0894465 sec
RG         71.53
DM         62.400 usec
DE         6.50 usec
TE         292.6 K
D1         1.0000000 sec
TD0        1

===== CHANNEL f1 =====
SFO1      400.1522008 MHz
NUC1       1H
P1         10.75 usec
PLM1       17.5000000 W

F2 - Processing parameters
SI         65536
SF         400.1500063 MHz
WDW        EM
SSB        0
LB         0.30 Hz
GB         0
PC         1.00

```

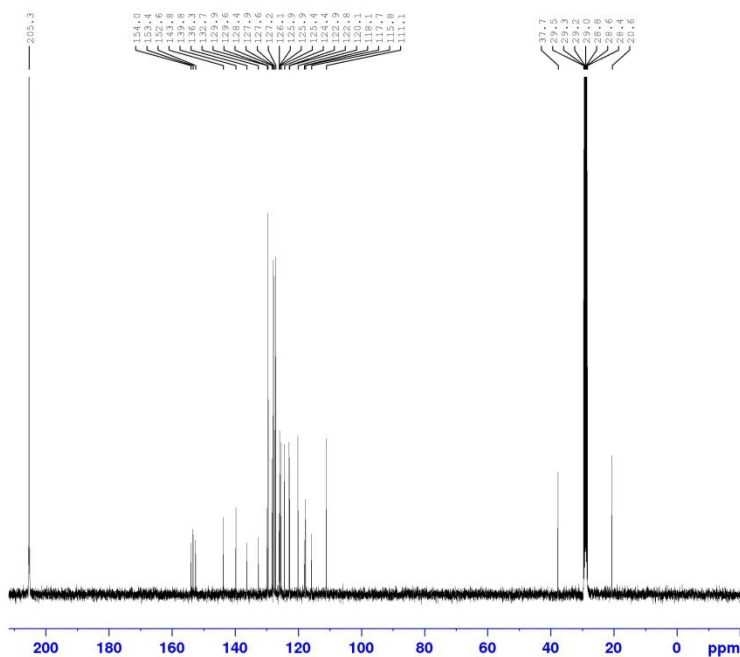

```

Current Data Parameters
NAME      R-7
EXPNO    176
PROCNO    1

F2 - Acquisition Parameters
Date_     20190317
Time      2.03
INSTRUM   spect
PROBHD    5 mm PABBO BB/
PULPROG   zgpg30
TD         65536
SOLVENT   Acetone
NS         512
DS         0
SWH        25252.525 Hz
FIDRES     0.385323 Hz
AQ         1.2976128 sec
RG         195.85
DM         19.800 usec
DE         6.50 usec
TE         293.1 K
D1         2.0000000 sec
D11        0.0300000 sec
TD0        1

===== CHANNEL f1 =====
SFO1      100.6283629 MHz
NUC1       13C
P1         10.50 usec
PLM1       74.0000000 W

===== CHANNEL f2 =====
SFO2      400.1516006 MHz
NUC2       1H
PCPDPRG[2] waltz16
PCPD2      90.00 usec
PLM2       17.5000000 W
PLM12      0.26142001 W
PLM13      0.13149001 W

F2 - Processing parameters
SI         32768
SF         100.6177980 MHz
WDW        EM
SSB        0
LB         1.00 Hz
GB         0
PC         1.40

```

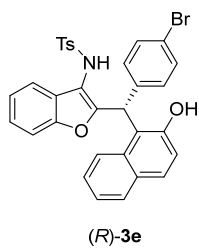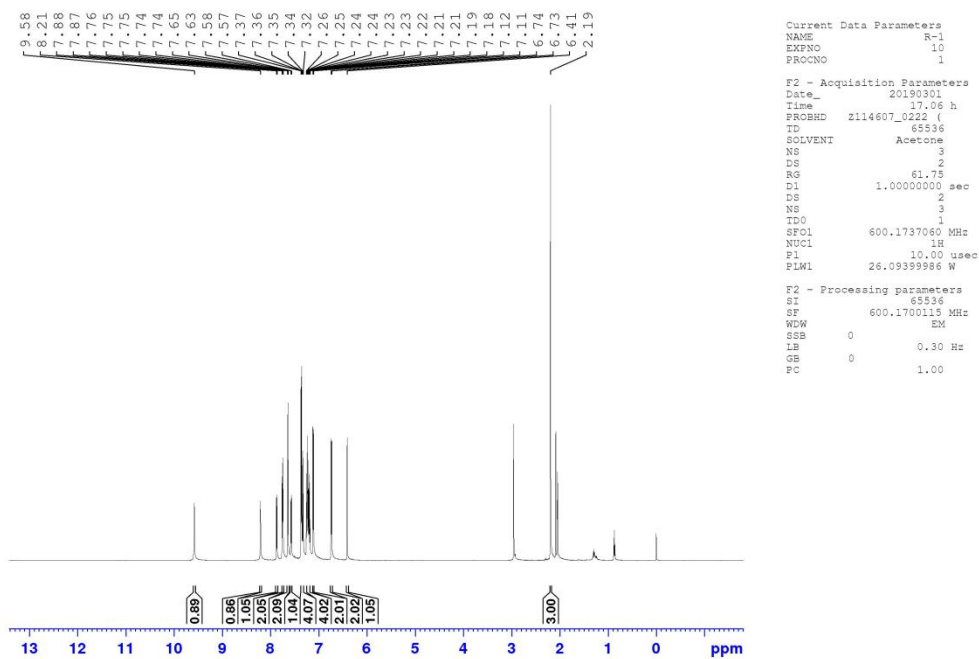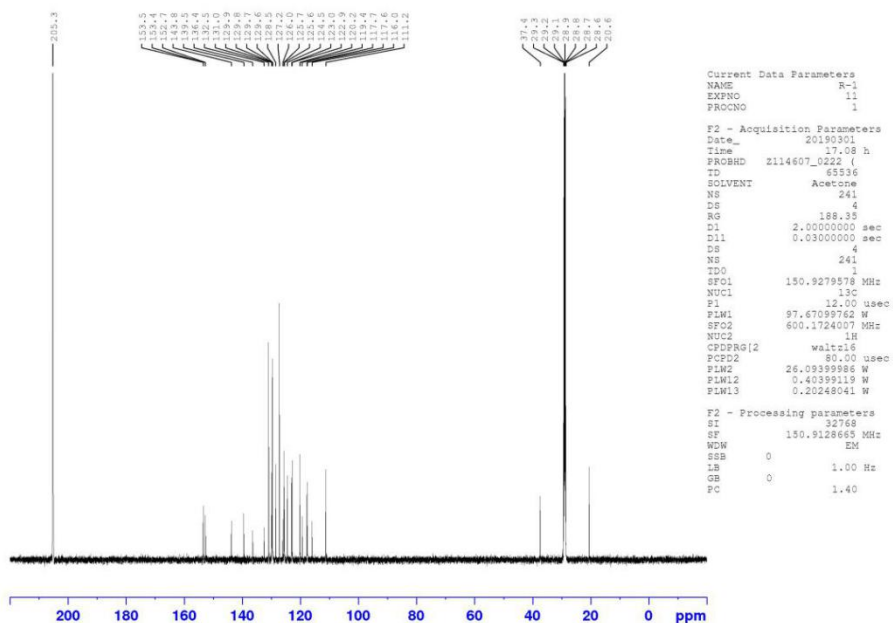



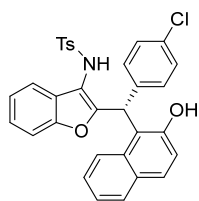

(R)-3f

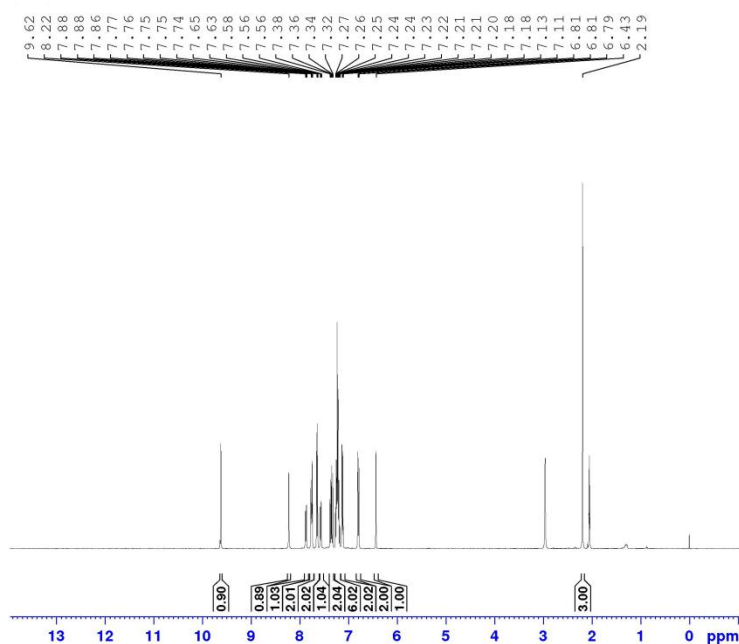

```

Current Data Parameters
NAME      R-12
EXPNO     187
PROCNO    1

F2 - Acquisition Parameters
Date_     20190328
Time      11.38
INSTRUM   spect
PROBHD    5 mm PABBO BB/
PULPROG   zgpg30
TD         65536
SOLVENT   Acetone
NS         8
DS         0
SWH        8012.820 Hz
FIDRES     0.122266 Hz
AQ         4.0894465 sec
RG         63.8
DW         62.400 usec
DE         6.50 usec
TE         294.3 K
D1         1.00000000 sec
TD0        1

===== CHANNEL f1 =====
SFO1      400.1522008 MHz
NUC1       1H
P1         10.78 usec
PLW1      17.50000000 W

F2 - Processing Parameters
SI         65536
SF         400.1500065 MHz
WDW        EM
SSB        0
LB         0.30 Hz
GB         0
PC         1.00

```

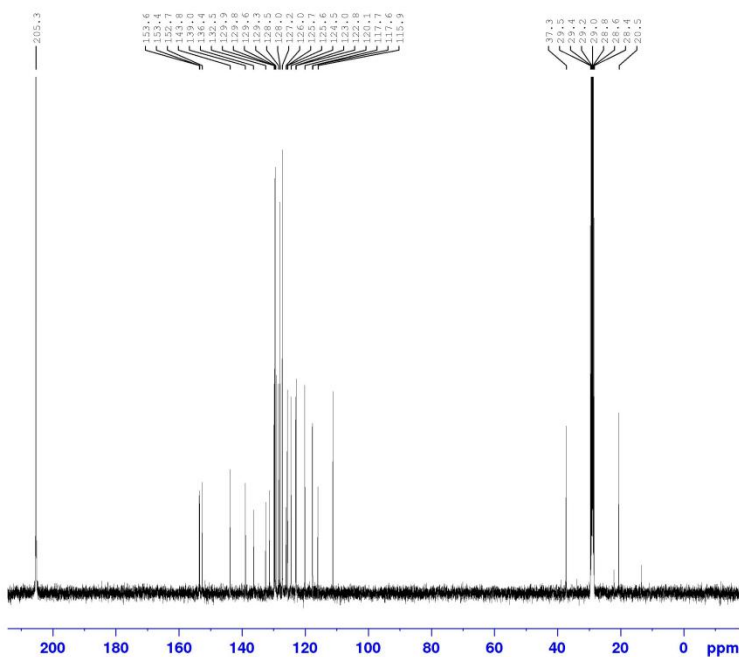

```

Current Data Parameters
NAME      R-12
EXPNO     184
PROCNO    1

F2 - Acquisition Parameters
Date_     20190325
Time      23.06
INSTRUM   spect
PROBHD    5 mm PABBO BB/
PULPROG   zgpg30
TD         65536
SOLVENT   Acetone
NS         425
DS         0
SWH        25252.525 Hz
FIDRES     0.385323 Hz
AQ         1.2976128 sec
RG         135.85
DW         19.800 usec
DE         6.50 usec
TE         294.1 K
D1         2.00000000 sec
D11        0.03000000 sec
TD0        1

===== CHANNEL f1 =====
SFO1      100.6283629 MHz
NUC1      13C
P1         10.50 usec
PLW1      74.00000000 W

===== CHANNEL f2 =====
SFO2      400.1516006 MHz
NUC2       1H
CPDPRG2   waltz16
PCPD2     90.00 usec
PLW2      17.50000000 W
PLM12     0.28142001 W
PLM13     0.13149001 W

F2 - Processing Parameters
SI         32768
SF         100.6177980 MHz
WDW        EM
SSB        0
LB         1.00 Hz
GB         0
PC         1.40

```

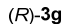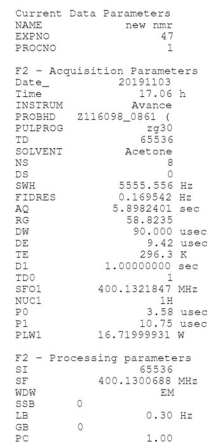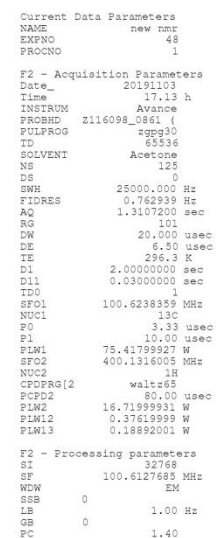

2-F

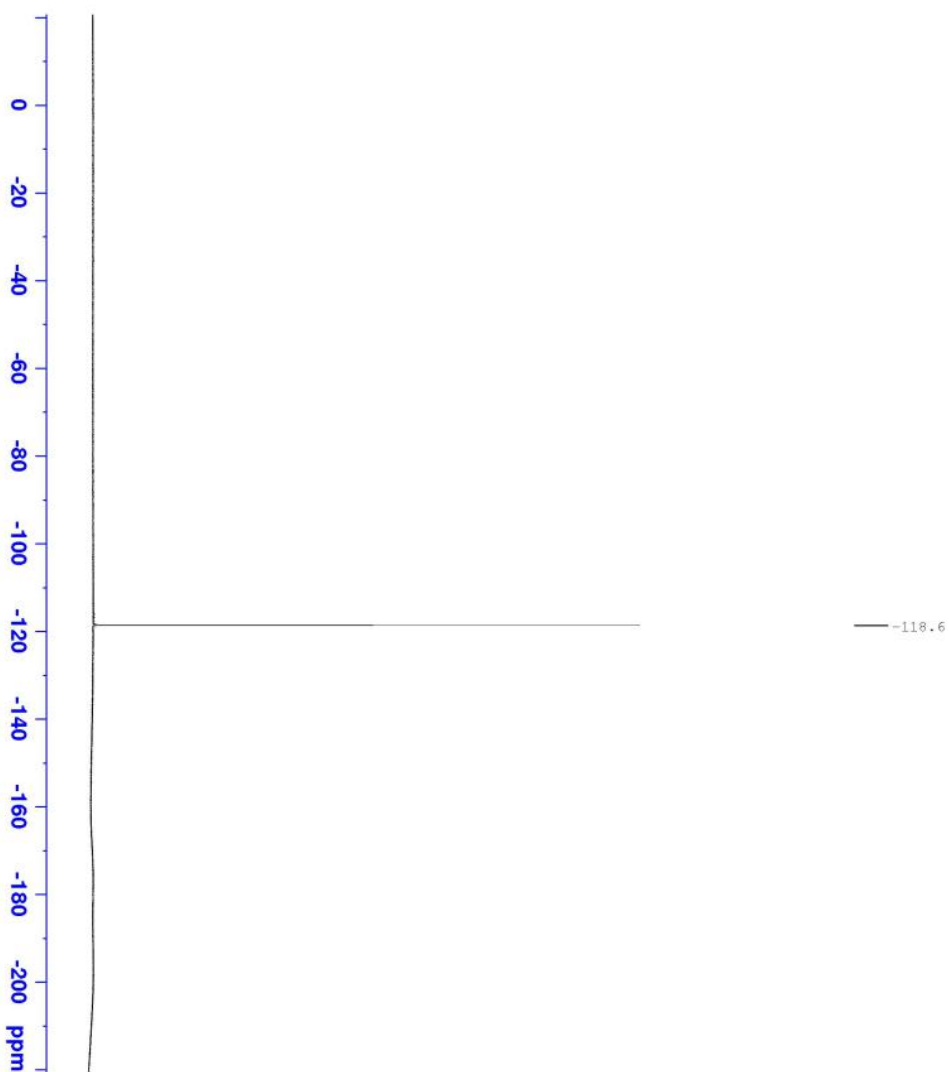

Current Data Parameters  
NAME new mr  
EXPNO 50  
PROCNO 1

F2 - Acquisition Parameters  
Date\_ 20121103  
Time\_ 17.19 h  
INSTRUM Avance  
PROBHD Z16096-0861 ( 29  
PULPROG zgpg30  
ID 131072  
SOLVENT Acetone  
NS 16  
DS 4  
SWH 90909.094 Hz  
FIDRES 1.387163 Hz  
AQ 0.720860 sec  
RG 101  
DW 5.500 usec  
DE 6.50 usec  
TE 296.5 K  
D1 1.00000000 sec  
TD0 1  
SFO1 376.4607164 MHz  
NUC1 19F  
P1 18.00 usec  
PLM1 16.38400078 W

F2 - Processing parameters  
SI 32768  
SF 376.4607164 MHz  
WDW EM  
SSB 0  
LB 0.30 Hz  
GB 0  
PC 1.00

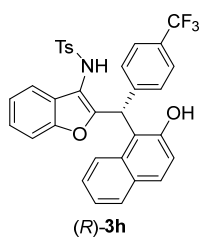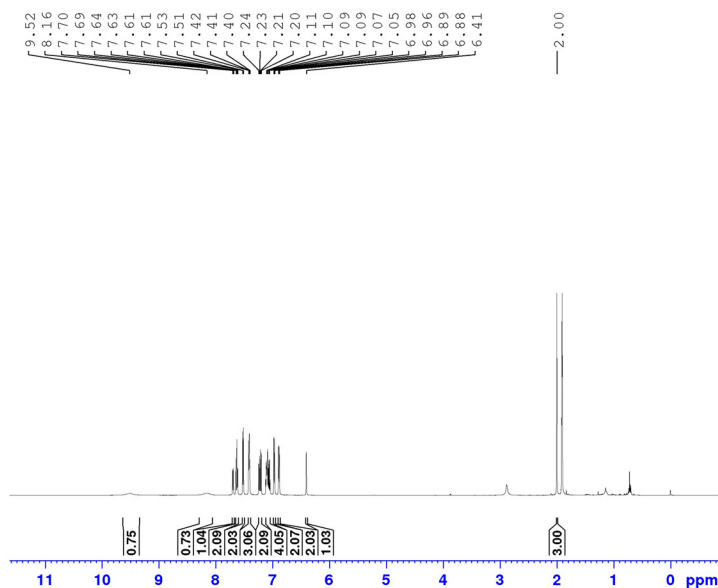

Current Data Parameters  
NAME Dec11-2019-wangchengjie  
EXPNO 100  
PROCNO 1  
F2 - Acquisition Parameters  
Date\_ 20191211  
Time 12.17 h  
PROBHD Z114607\_D222 (1  
TD 65536  
SOLVENT Acetone  
NS 16  
DS 2  
RG 30.88  
D1 1.00000000 sec  
DS 2  
NS 16  
TD0  
SFO1 600.1737060 MHz  
NUC1 1H  
P1 15.00 usec  
PLW1 26.09399986 W  
F2 - Processing parameters  
SI 65536  
SF 600.1700974 MHz  
WVW 1M  
SSB 0  
LB 0.30 Hz  
GB 0  
PC 1.00

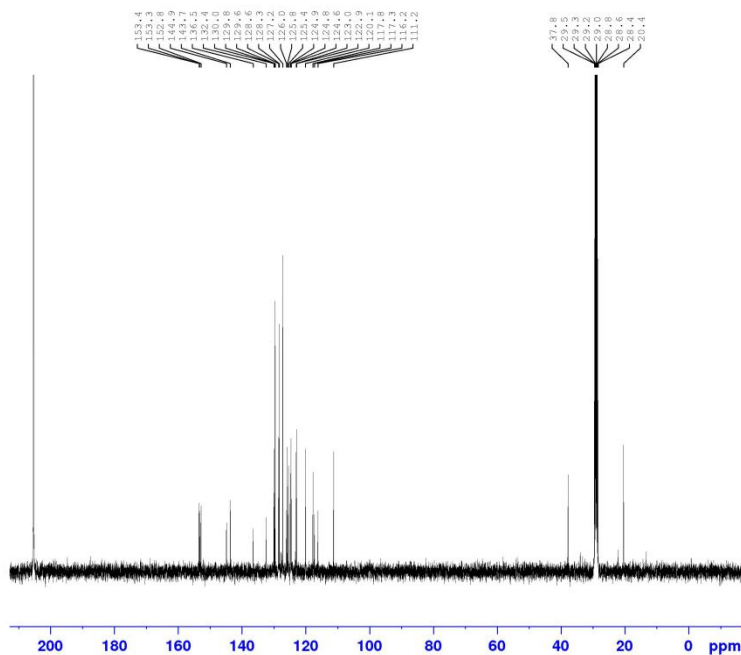

Current Data Parameters  
NAME old nmr  
EXPNO 158  
PROCNO 1  
F2 - Acquisition Parameters  
Date\_ 20190310  
Time 10.23  
INSTRUM spect  
PROBHD 5 mm PABBO BB//  
PULPROG zgpg30  
TD 65536  
SOLVENT Acetone  
NS 194  
DS 0  
SWH 25252.525 Hz  
FIDRES 0.385323 Hz  
AQ 1.2876128 sec  
RG 195.85  
DM 19.800 usec  
DE 6.50 usec  
TE 292.3 K  
D1 2.00000000 sec  
D11 0.03000000 sec  
TD0 1  
===== CHANNEL f1 =====  
SFO1 100.6283629 MHz  
NUC1 13C  
P1 10.50 usec  
PLW1 74.00000000 W  
===== CHANNEL f2 =====  
SFO2 400.1516006 MHz  
NUC2 1H  
CPDPRG2 waltz16  
PCPD2 90.00 usec  
PLW2 17.50000000 W  
PLW12 0.26142001 W  
PLW13 0.13149001 W  
F2 - Processing parameters  
SI 32768  
SF 100.6177980 MHz  
WVW EM  
SSB 0  
LB 1.00 Hz  
GB 0  
PC 1.40

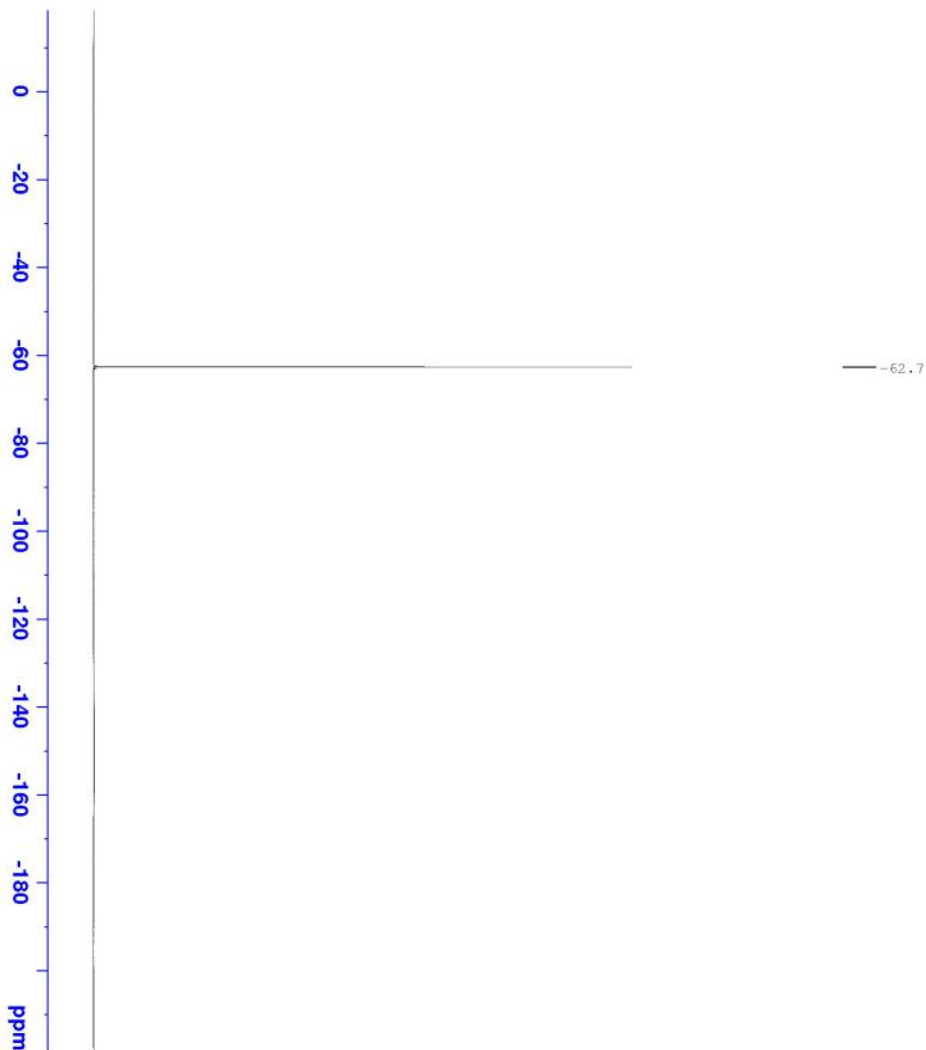

```

Current Data Parameters
NAME      old mmf
EXPNO     159
PROCNO    1

F2 - Acquisition Parameters
Date_     20190310
Time      10.34
INSTRUM   spect
PROBHD    5 mm PABBO BB/
PULPROG   zgpg30
ID         131072
SOLVENT   Acetone
NS         16
DS         4
SWH        89285.711 Hz
FIDRES     0.681196 Hz
AQ         0.7340032 sec
RG         195.85
DW         5.600 usec
DE         6.50 usec
TE         292.6 K
D1         1.00000000 sec
TD0        1

===== CHANNEL f1 =====
SFO1       376.4795333 MHz
NUC1       19F
P1         14.00 usec
PL1        24.85000038 W

F2 - Processing parameters
SI         65536
SF         376.5171850 MHz
WDW        EM
SSB        0
LB         0.30 Hz
GB         0
PC         1.00
  
```

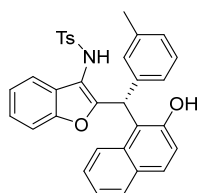

(R)-3i

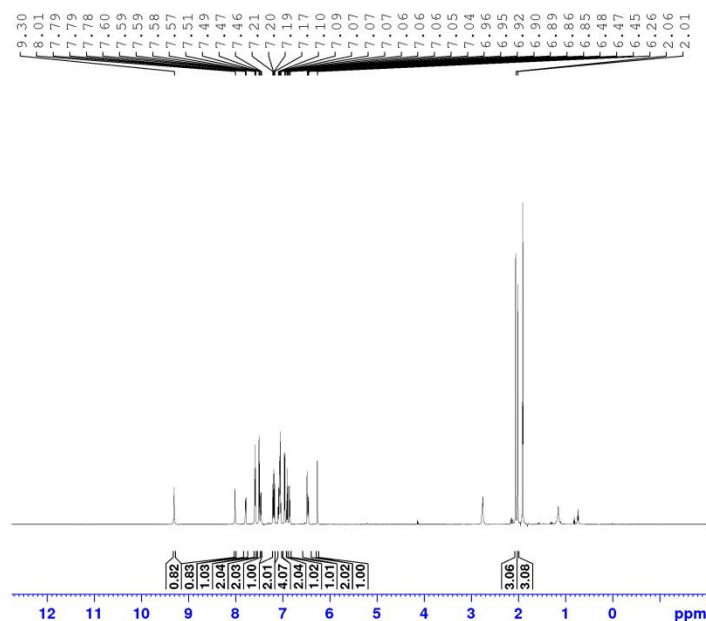

```

Current Data Parameters
NAME      R-19
EXPNO     60
PROCNO    1

F2 - Acquisition Parameters
Date_     20190411
Time      21.53 h
PROBHD    Z114607_0222 (
TD         65536
SOLVENT   Acetone
NS         2
DS         2
RG         53.41
D1         1.00000000 sec
DS         2
NS         2
TD0        1
SFO1       600.1737060 MHz
NUC1       1H
P1         10.00 usec
PLW1       26.09399986 W

F2 - Processing parameters
SI         65536
SF         600.1700980 MHz
WDW        EM
SSB        0
LB         0.30 Hz
GB         0
PC         1.00
  
```

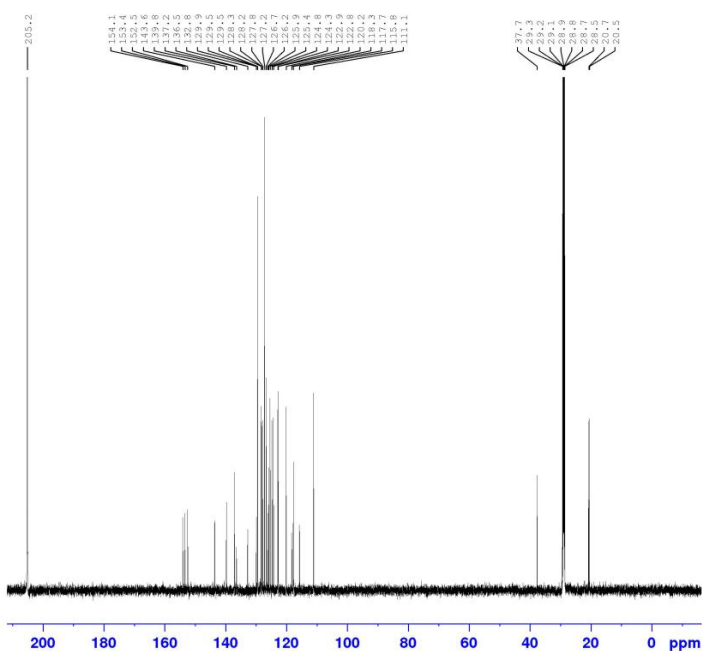

```

Current Data Parameters
NAME      R-19
EXPNO     61
PROCNO    1

F2 - Acquisition Parameters
Date_     20190411
Time      22.08 h
PROBHD    Z114607_0222 (
TD         65536
SOLVENT   Acetone
NS         280
DS         4
RG         188.35
D1         2.00000000 sec
D11        0.03000000 sec
DS         4
NS         280
TD0        1
SFO1       150.9279578 MHz
NUC1       13C
P1         12.00 usec
PLW1       97.67099762 W
SFO2       600.1724007 MHz
NUC2       1H
CPDPRG2   waltz16
PCPD2      80.00 usec
PLM2       26.09399986 W
PLM12      0.40399119 W
PLM13      0.20248041 W

F2 - Processing parameters
SI         32768
SF         150.9128663 MHz
WDW        EM
SSB        0
LB         1.00 Hz
GB         0
PC         1.40
  
```

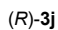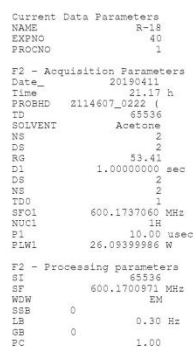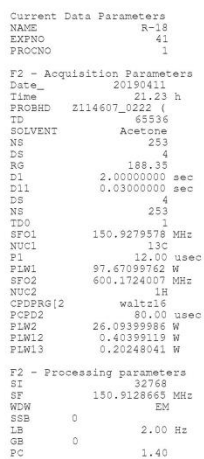

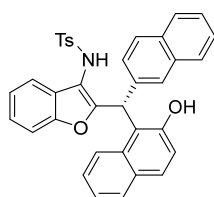

(R)-3k

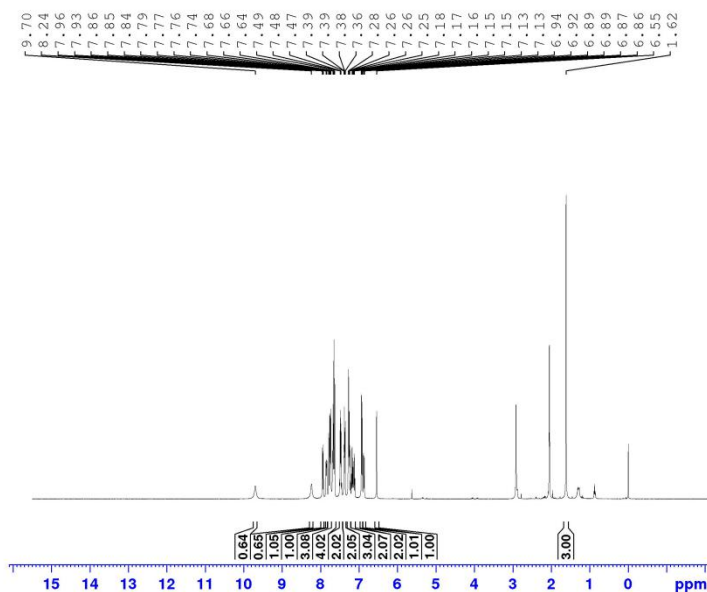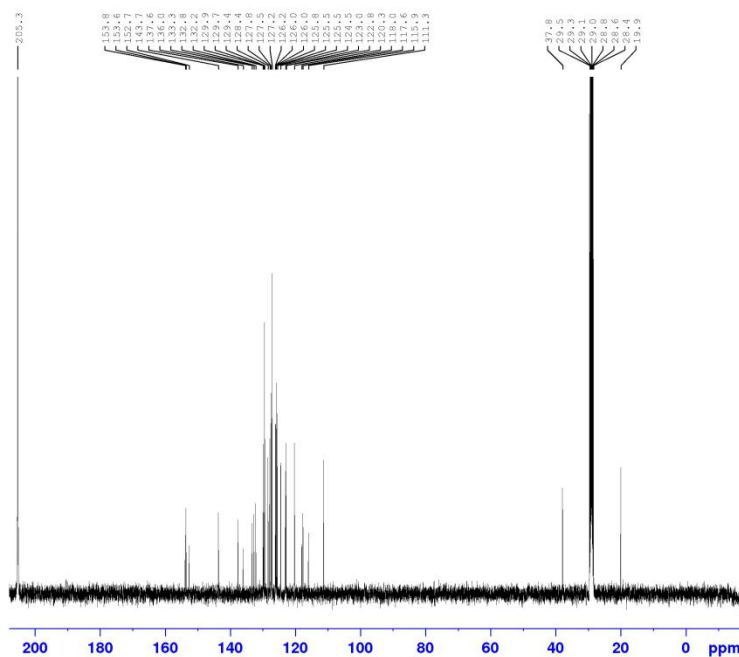



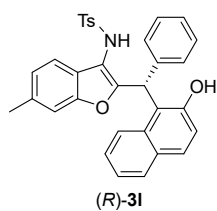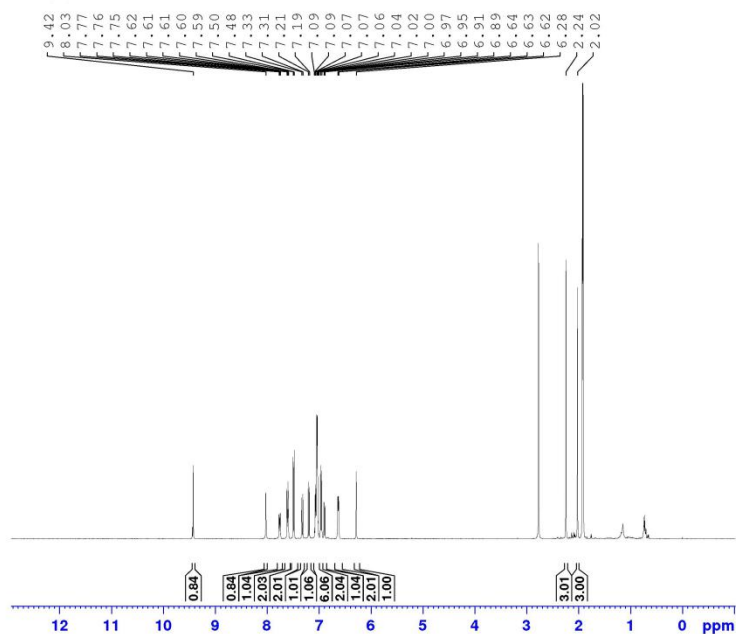

```

Current Data Parameters
NAME      R-24
EXPNO     194
PROCNO    1

F2 - Acquisition Parameters
Date_     20190402
Time      8.34
INSTRUM   spect
PROBHD    5 mm PABBO BB/
PULPROG   zg30
TD         65536
SOLVENT   Acetone
NS         8
DS         0
SWH        8012.820 Hz
FIDRES     0.122266 Hz
AQ         4.0894465 sec
RG         71.53
DW         62.400 usec
DE         6.50 usec
TE         293.1 K
D1         1.00000000 sec
TD0        1

===== CHANNEL f1 =====
SFO1      400.1522008 MHz
NUC1       1H
P1         10.75 usec
PLW1       17.50000000 W

F2 - Processing parameters
SI         65536
SF         400.1500603 MHz
WDW        EM
SSB        0
LB         0.30 Hz
GB         0
PC         1.00

```

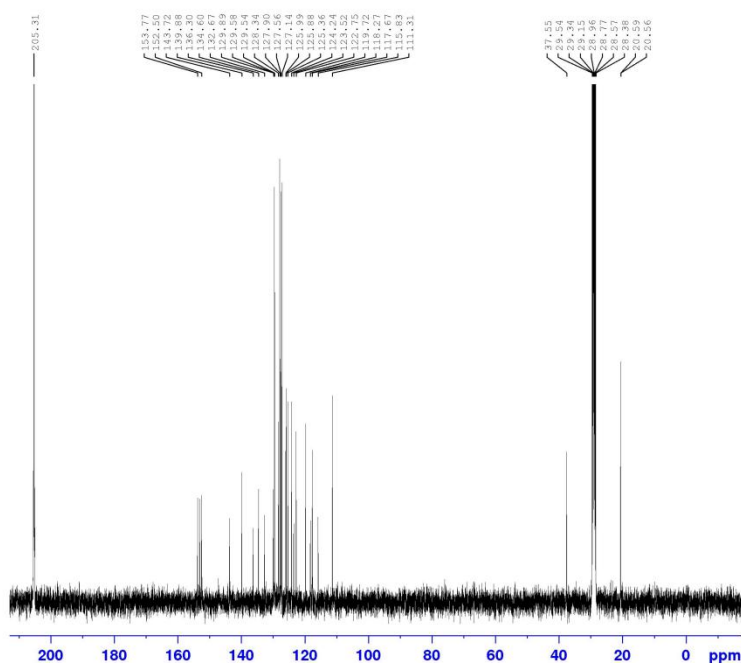

```

Current Data Parameters
NAME      R-24
EXPNO     195
PROCNO    1

F2 - Acquisition Parameters
Date_     20190402
Time      8.41
INSTRUM   spect
PROBHD    5 mm PABBO BB/
PULPROG   zgpg30
TD         65536
SOLVENT   Acetone
NS         512
DS         0
SWH        25252.525 Hz
FIDRES     0.385323 Hz
AQ         1.2976128 sec
RG         195.85
DW         19.800 usec
DE         6.50 usec
TE         293.4 K
D1         2.00000000 sec
D11        0.03000000 sec
TD0        1

===== CHANNEL f1 =====
SFO1      100.6283629 MHz
NUC1       13C
P1         10.50 usec
PLW1       74.00000000 W

===== CHANNEL f2 =====
SFO2      400.1516006 MHz
NUC2       1H
CPDPRG2   waltz16
PCPD2     90.00 usec
PLM2      17.50000000 W
PLW2      0.26142001 W
PLM3      0.13149001 W

F2 - Processing parameters
SI         32768
SF         100.6177980 MHz
WDW        EM
SSB        0
LB         1.00 Hz
GB         0
PC         1.40

```

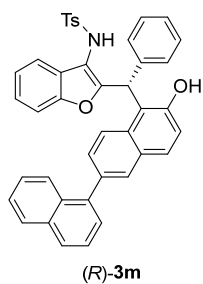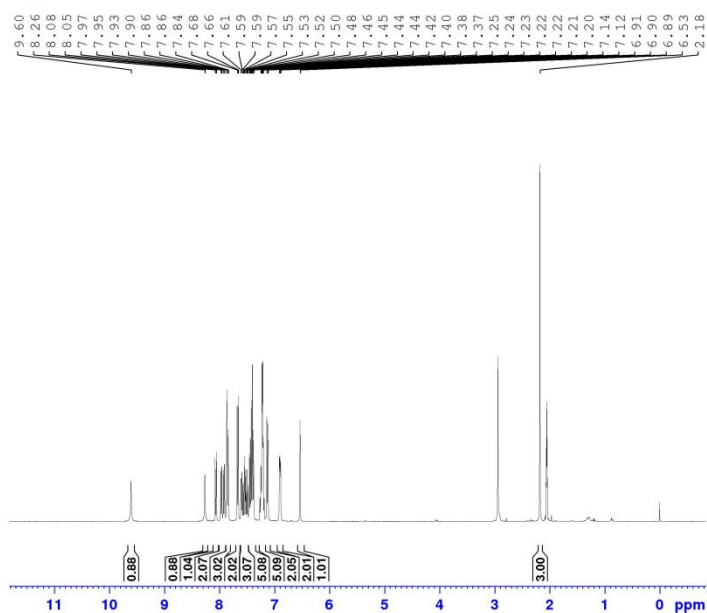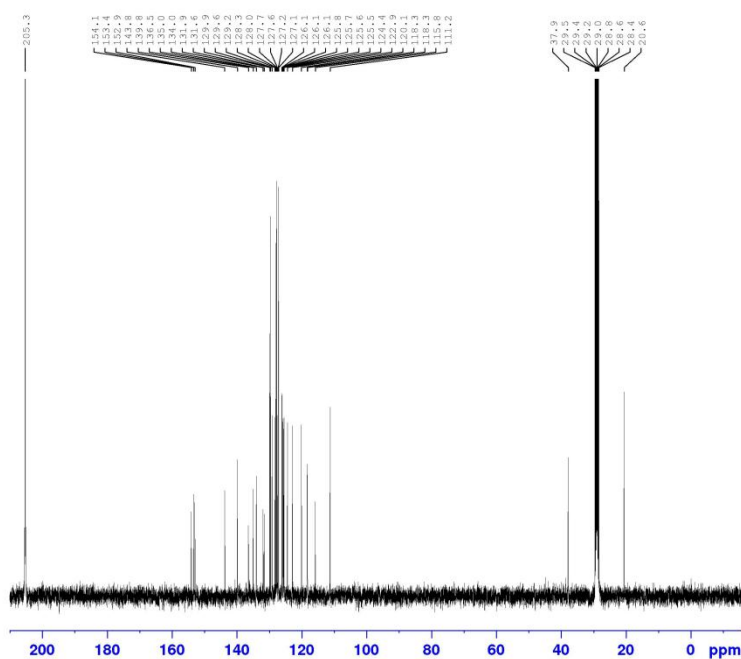

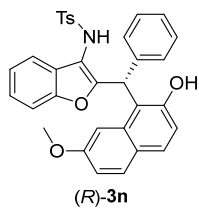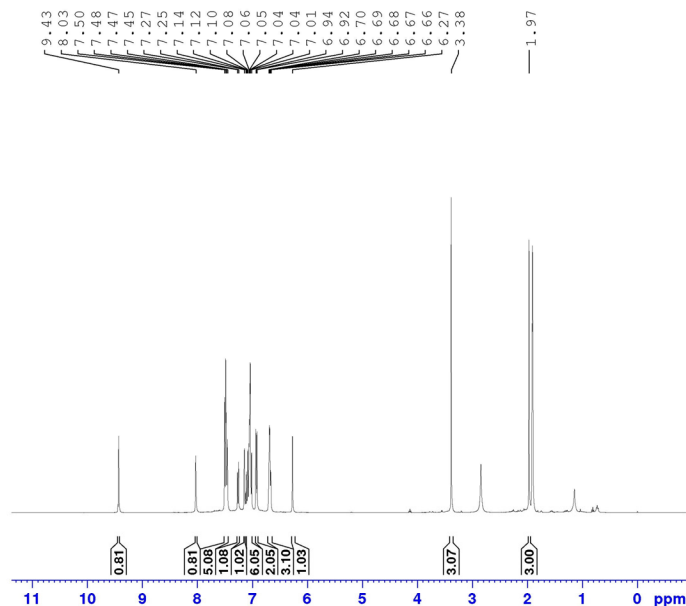

```

Current Data Parameters
NAME      R-4
EXPNO     250
PROCNO    1

F2 - Acquisition Parameters
Date_     20190510
Time      19.08
INSTRUM   spect
PROBHD    5 mm PABBO BB/
PULPROG   zg30
TD         65536
SOLVENT   Acetone
NS         8
DS         0
SWH        8012.820 Hz
FIDRES     0.122266 Hz
AQ         4.0894465 sec
RG         31.56
DW         62.400 usec
DE         6.50 usec
TE         296.5 K
D1         1.00000000 sec
TD0        1

===== CHANNEL f1 =====
SFO1      400.1522008 MHz
NUC1      1H
P1        10.75 usec
PLW1      17.50000000 W

F2 - Processing parameters
SI         65536
SF         400.1500643 MHz
WDW        EM
SSB        0
LB         0.30 Hz
GB         0
PC         1.00

```

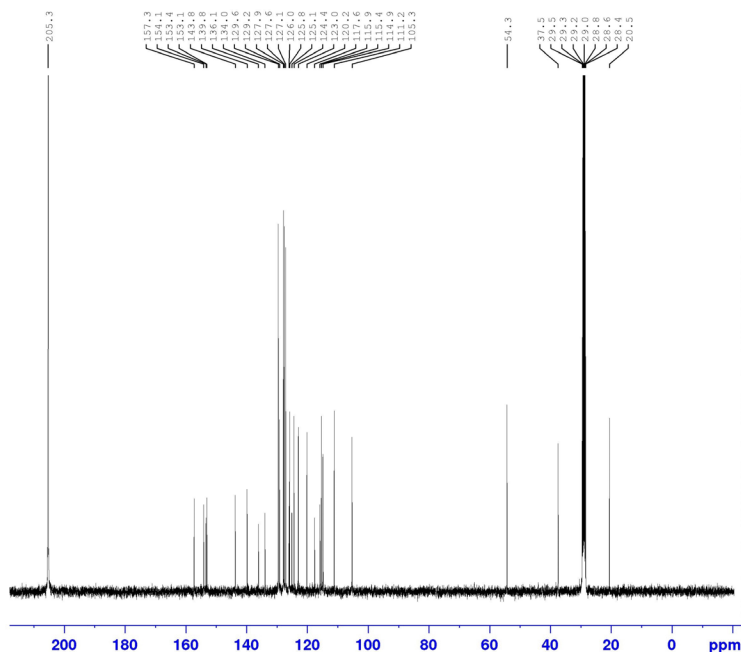

```

Current Data Parameters
NAME      R-4
EXPNO     251
PROCNO    1

F2 - Acquisition Parameters
Date_     20190510
Time      19.22
INSTRUM   spect
PROBHD    5 mm PABBO BB/
PULPROG   zgpg30
TD         65536
SOLVENT   Acetone
NS         512
DS         0
SWH        25252.525 Hz
FIDRES     0.385323 Hz
AQ         1.2976128 sec
RG         195.85
DW         19.800 usec
DE         6.50 usec
TE         297.0 K
D1         2.00000000 sec
D11        0.03000000 sec
TD0        1

===== CHANNEL f1 =====
SFO1      100.6283629 MHz
NUC1      13C
P1        10.50 usec
PLW1      74.00000000 W

===== CHANNEL f2 =====
SFO2      400.1516006 MHz
NUC2      1H
CPDPRG2   waltz16
PCPD2     90.00 usec
PLW2      17.50000000 W
PLW12     0.26142001 W
PLW13     0.13149001 W

F2 - Processing parameters
SI         32768
SF         100.6177990 MHz
WDW        EM
SSB        0
LB         1.00 Hz
GB         0
PC         1.40

```

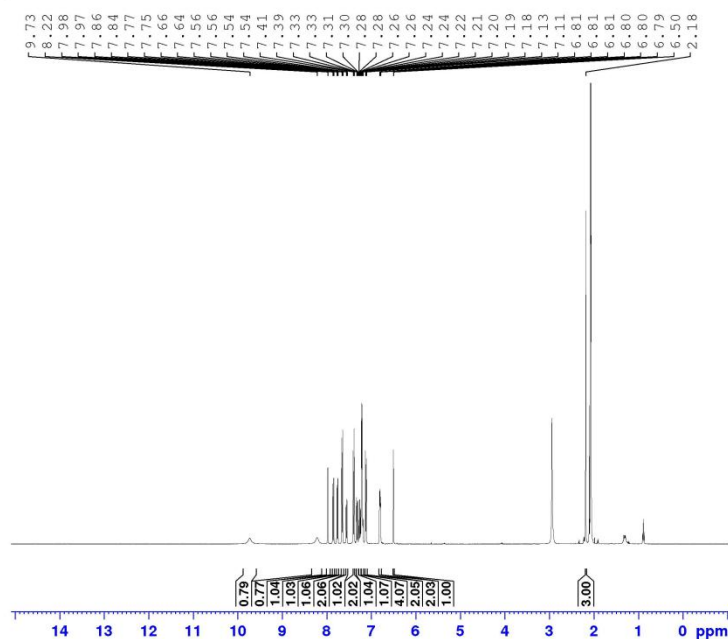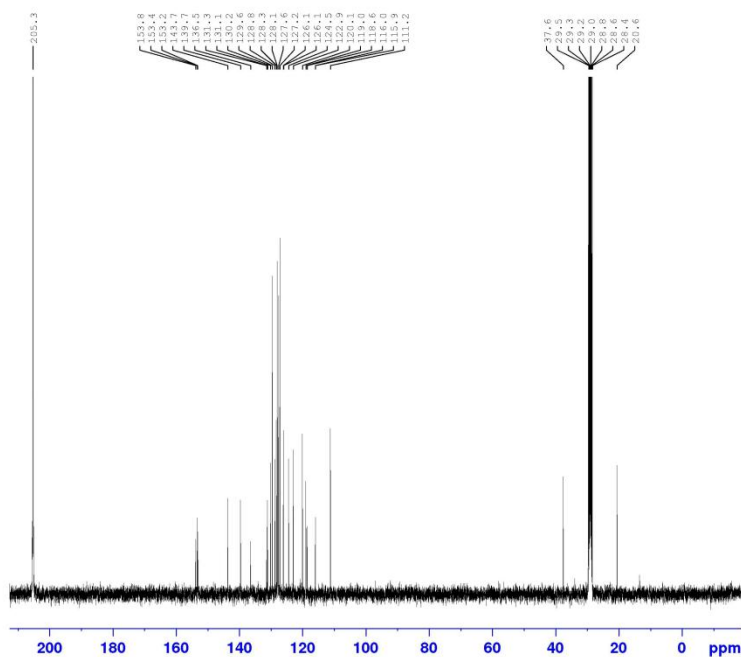

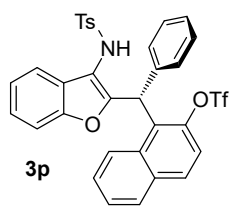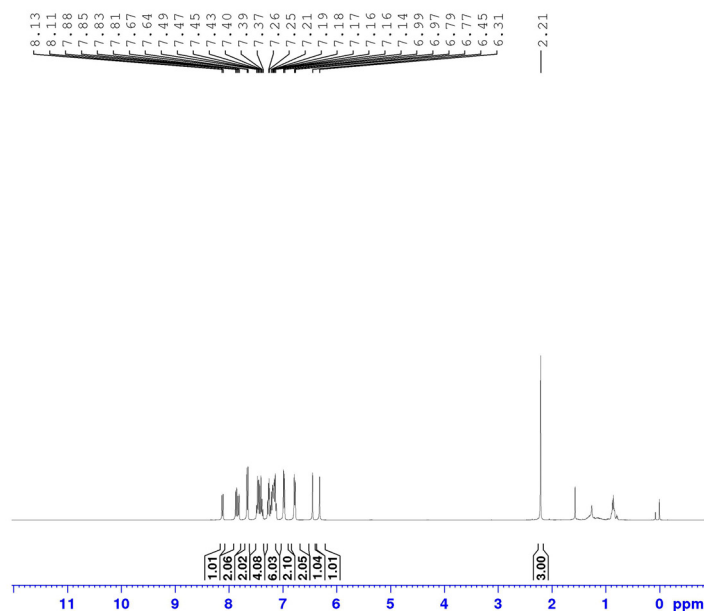

```
Current Data Parameters
NAME      old nmr
EXPNO     260
PROCNO    1

F2 - Acquisition Parameters
Date_     20190517
Time      5.23
INSTRUM   spect
PROBHD    5 mm PABBO BB/
PULPROG   zg30
TD         65536
SOLVENT   CDCl3
NS         8
DS         0
SWH        8012.820 Hz
FIDRES     0.122266 Hz
AQ         4.089465 sec
RG         78.11
DW         62.400 usec
DE         6.50 usec
TE         297.3 K
D1         1.00000000 sec
TD0        1

===== CHANNEL f1 =====
SFO1      400.1522008 MHz
NUC1       1H
P1         10.75 usec
PLW1      17.50000000 W

F2 - Processing parameters
SI         65536
SF         400.1500128 MHz
WDW        EM
SSB        0
GB         0
PC         1.00
```

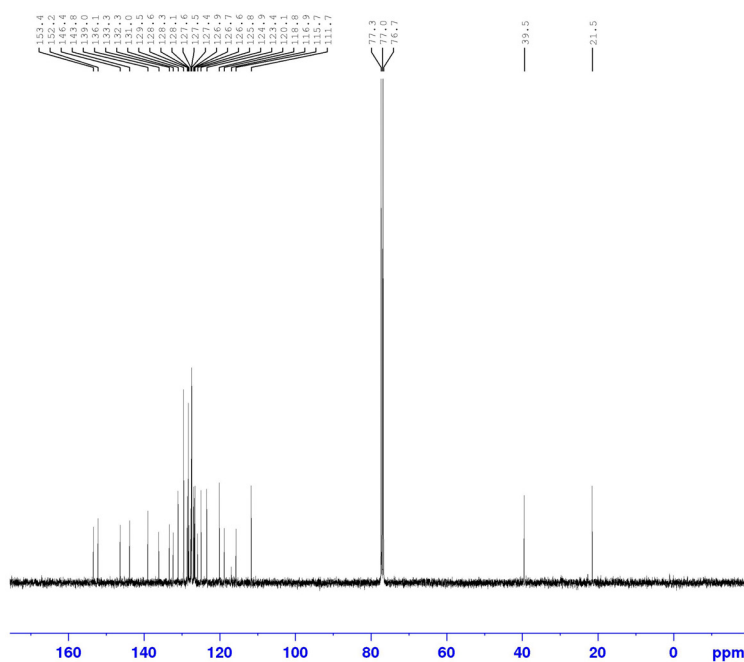

```
Current Data Parameters
NAME      old nmr
EXPNO     261
PROCNO    1

F2 - Acquisition Parameters
Date_     20190517
Time      5.53
INSTRUM   spect
PROBHD    5 mm PABBO BB/
PULPROG   zgpg30
TD         65536
SOLVENT   CDCl3
NS         512
DS         0
SWH        25252.525 Hz
FIDRES     0.385323 Hz
AQ         1.2976128 sec
RG         195.85
DW         19.800 usec
DE         6.50 usec
TE         297.8 K
D1         2.00000000 sec
D11        0.03000000 sec
TD0        1

===== CHANNEL f1 =====
SFO1      100.6283629 MHz
NUC1       13C
P1         10.50 usec
PLW1      74.00000000 W

===== CHANNEL f2 =====
SFO2      400.1516006 MHz
NUC2       1H
CPDPRG2   waltz16
PCPD2     90.00 usec
PLM2      17.50000000 W
PLM12     0.26142001 W
PLM13     0.13149001 W

F2 - Processing parameters
SI         32768
SF         100.6177980 MHz
WDW        EM
SSB        0
GB         0
PC         1.40
```

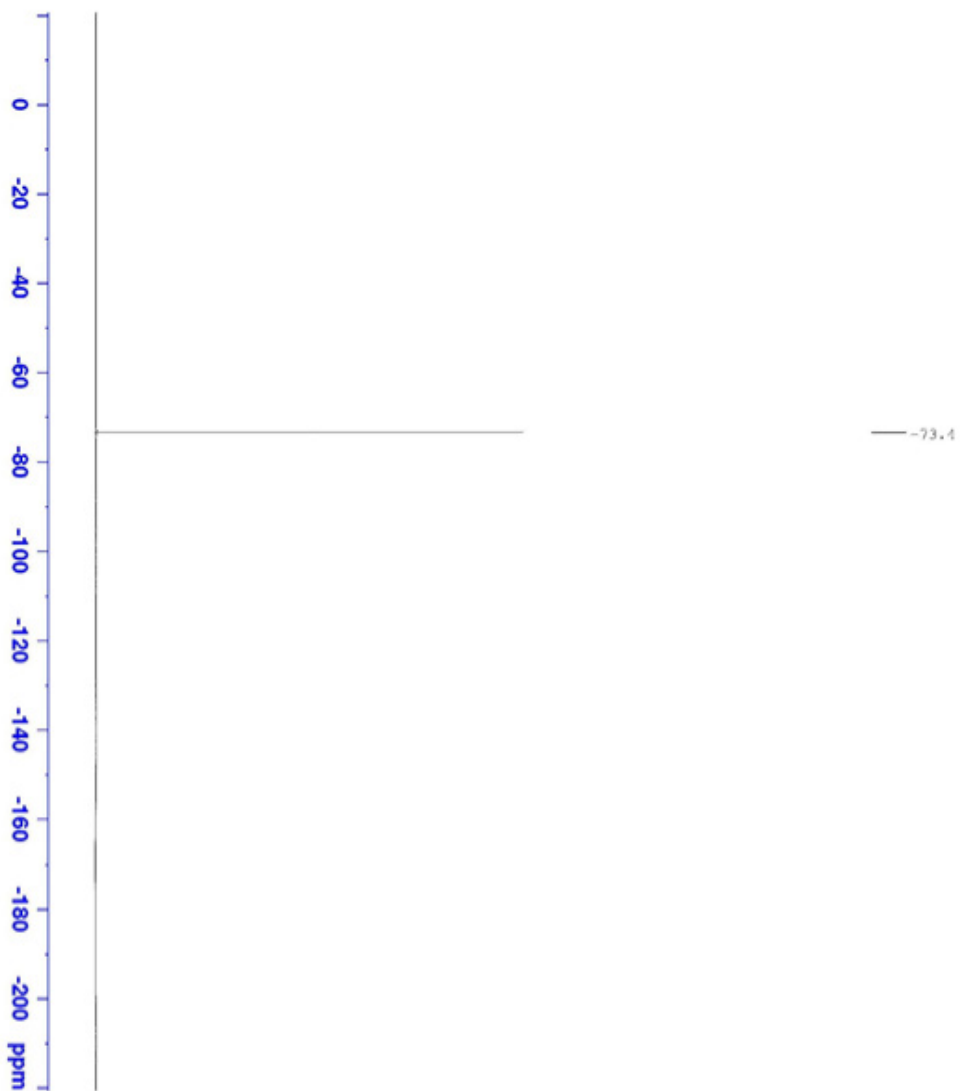

```

Current Data Parameters
NAME          Ref 1
EXPNO        32
PROCNO       1
F2 - Acquisition Parameters
Date_        201214
Time         1.14 h
INSTRUM      Avance
PROBHD       516098_0861 (
PULPROG      zgpg
TD           65536
FIDRES       15.072
SOLVENT      CDCl3
NS           16
DS           4
SFR          52903.004 Hz
F2REFS       1.58163 Hz
AQ           0.120550 sec
RG           512
DM           5.500 usec
DE           6.50 usec
IE           24.3 K
D-           1.0000000 sec
TD3          376.460764 MHz
SFO1         125
NUC1         13C
P-           18.00 usec
FID1         16.3840078 M
F2 - Processing parameters
SI           65536
SF           376.458662 MHz
WDW          EM
SSB          0
LB           0.30 Hz
GB           0
PC           1.00
  
```

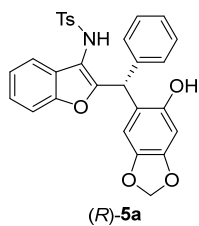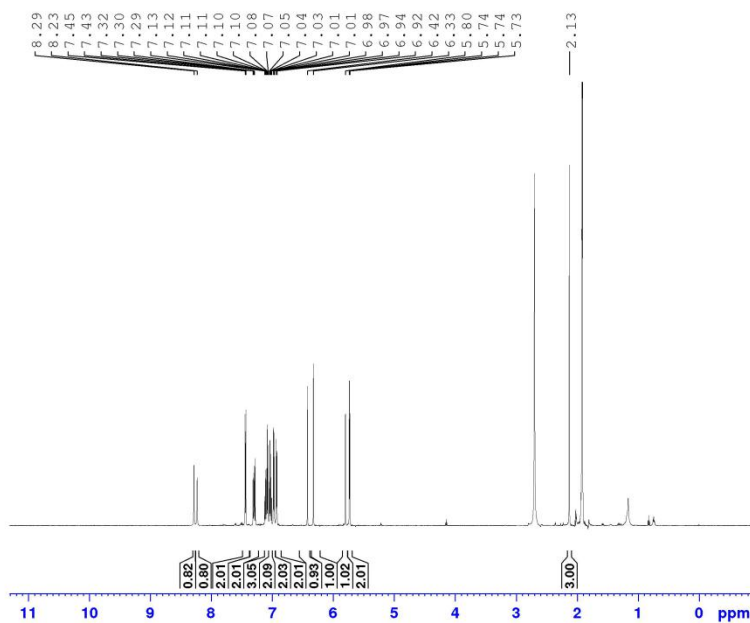

Current Data Parameters  
NAME R-22  
EXPNO 50  
PROCNO 1

F2 - Acquisition Parameters  
Date\_ 20190411  
Time 21.35 h  
PROBHD Z114607\_0222 ( )  
TD 65536  
SOLVENT Acetone  
NS 3  
DS 2  
RG 84.67  
D1 1.00000000 sec  
DS 2  
NS 3  
TD0 1  
SFO1 600.1737060 MHz  
NUC1 1H  
P1 10.00 usec  
PLW1 26.09399986 W

F2 - Processing parameters  
SI 65536  
SF 600.1700912 MHz  
WDW EM  
SSB 0  
LB 0.30 Hz  
GB 0  
PC 1.00

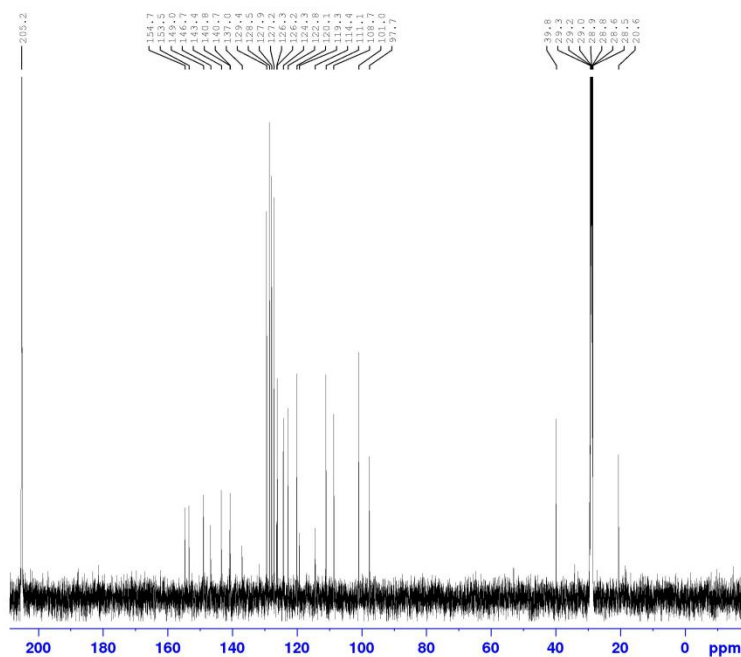

Current Data Parameters  
NAME R-22  
EXPNO 51  
PROCNO 1

F2 - Acquisition Parameters  
Date\_ 20190411  
Time 21.49 h  
PROBHD Z114607\_0222 ( )  
TD 65536  
SOLVENT Acetone  
NS 256  
DS 4  
RG 158.33  
D1 2.00000000 sec  
D11 0.03000000 sec  
DS 4  
NS 256  
TD0 1  
SFO1 150.9279578 MHz  
NUC1 13C  
P1 12.00 usec  
PLW1 97.67099762 W  
SFO2 600.1724007 MHz  
NUC2 1H  
CPCPRG[2] waltz16  
PCPD2 80.00 usec  
PLW2 26.09399986 W  
PLW12 0.40399119 W  
PLW13 0.20248041 W

F2 - Processing parameters  
SI 32768  
SF 150.9128665 MHz  
WDW EM  
SSB 0  
LB 2.00 Hz  
GB 0  
PC 1.40

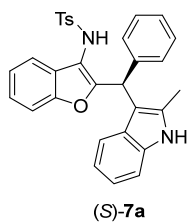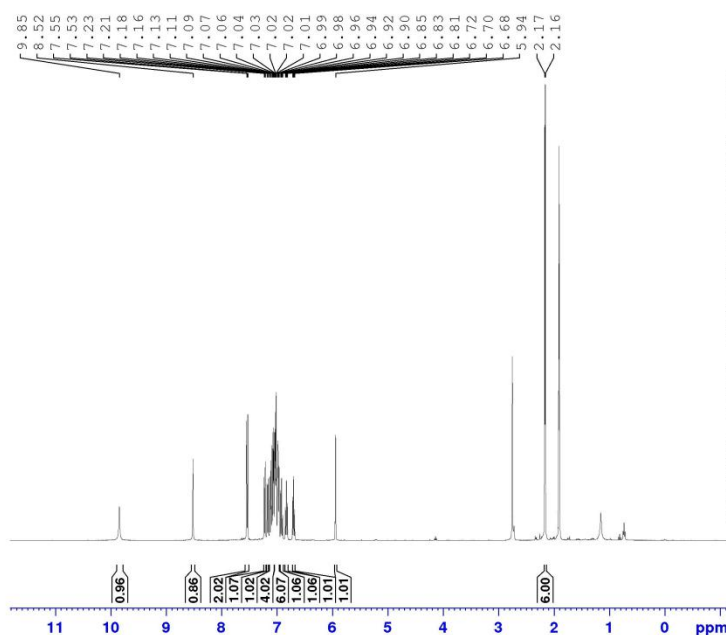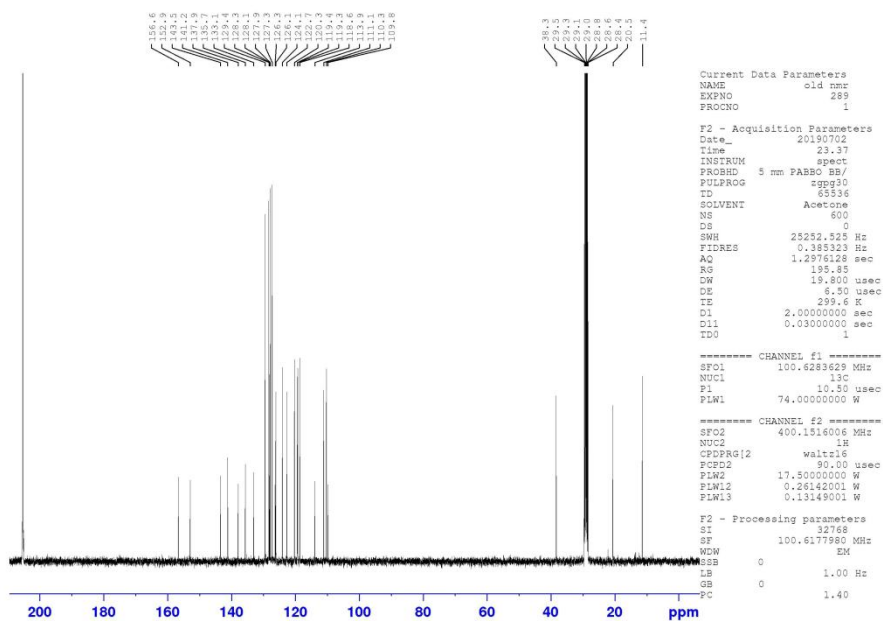



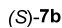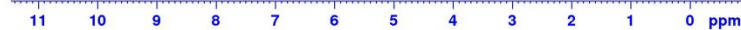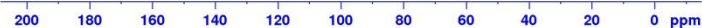

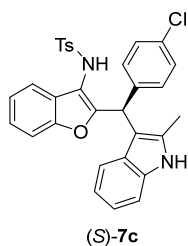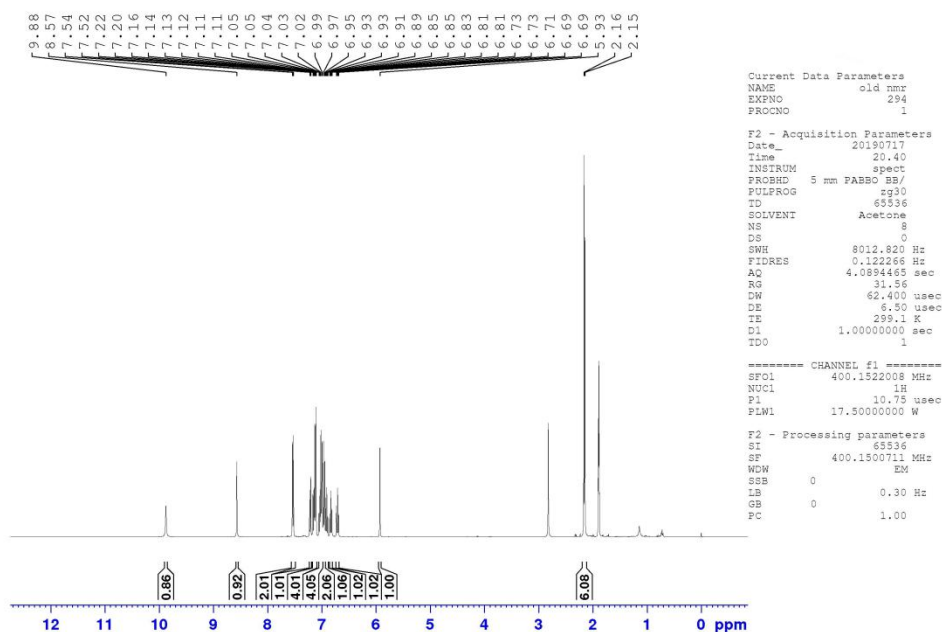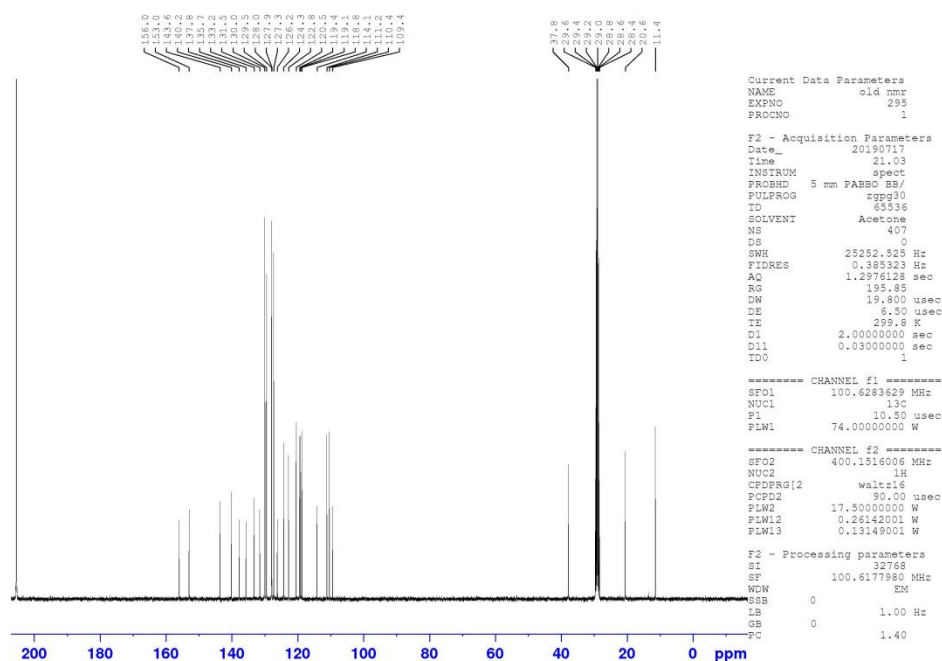

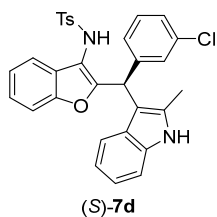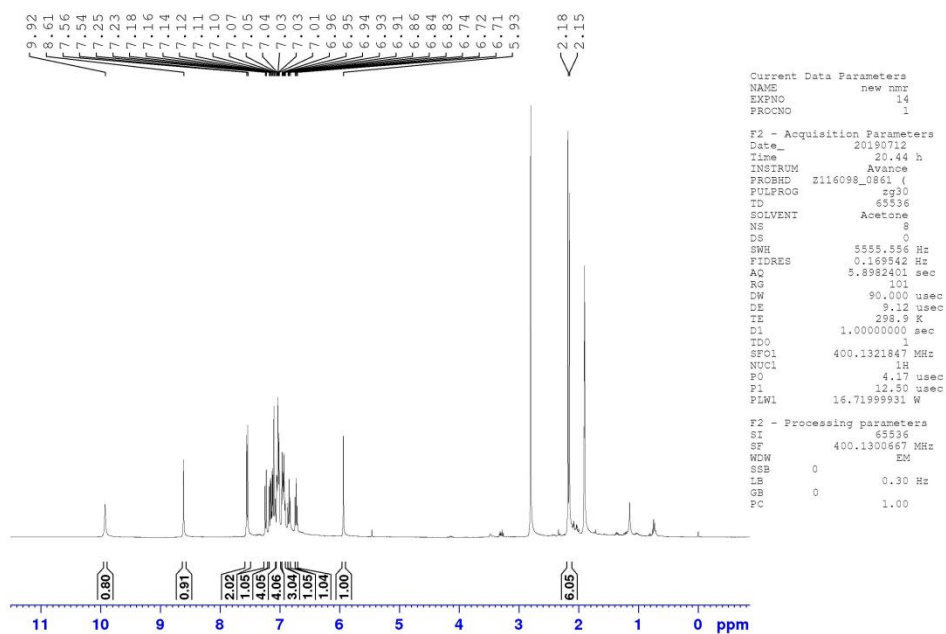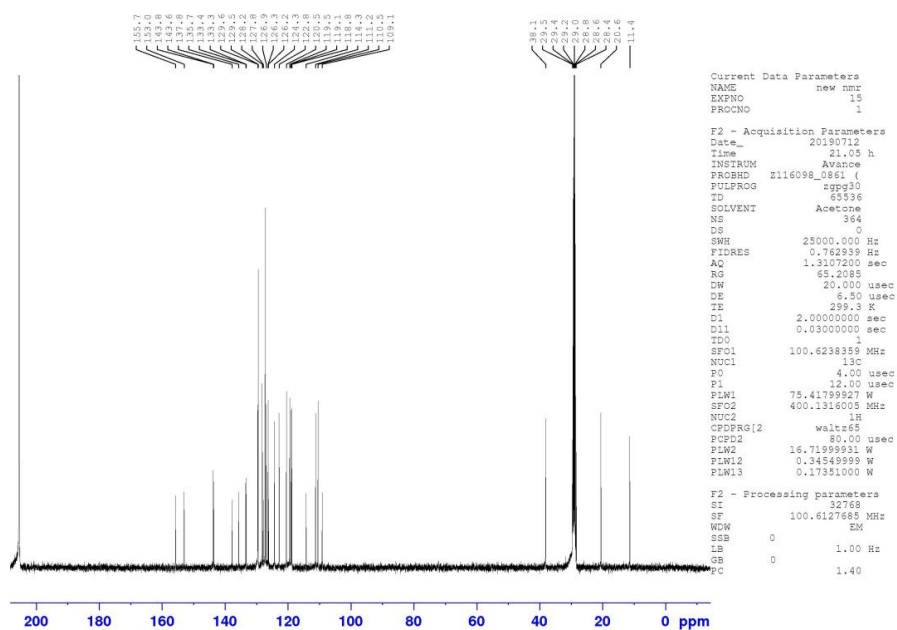

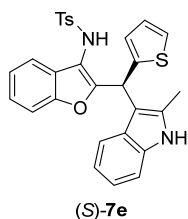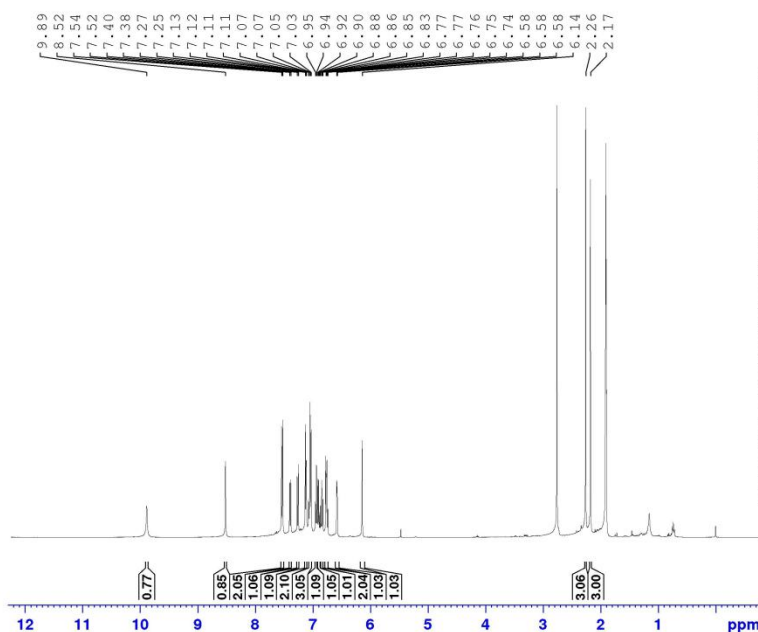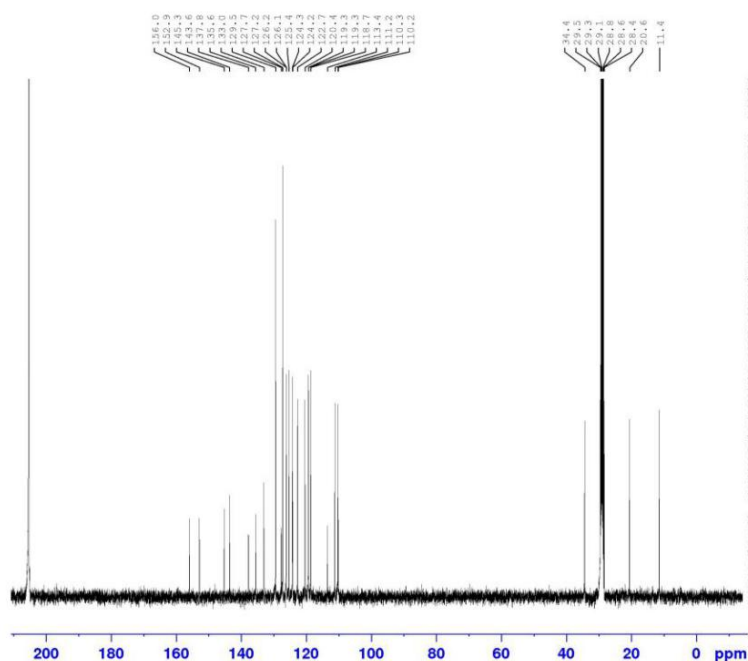

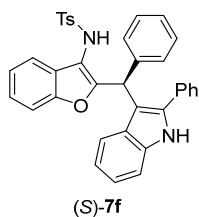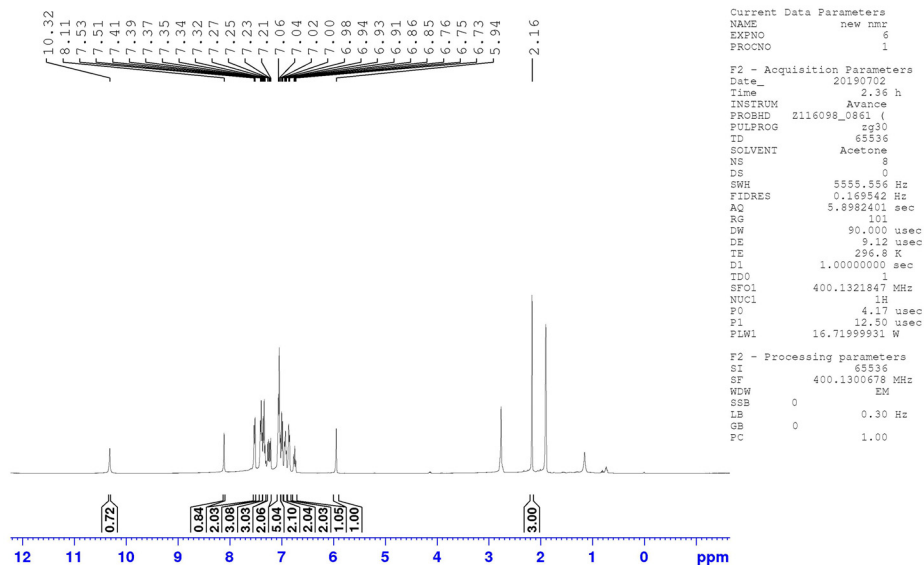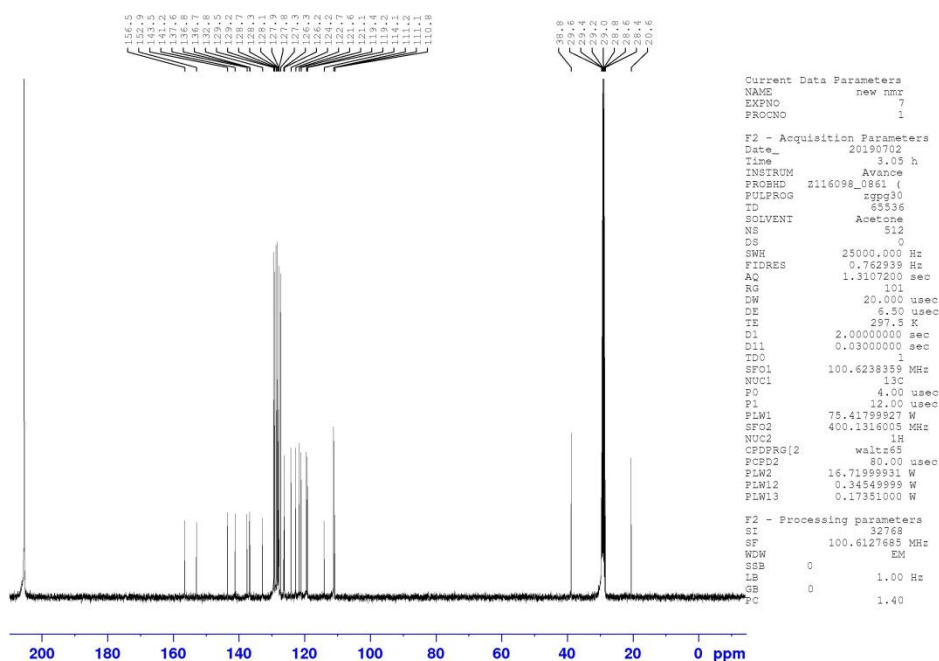

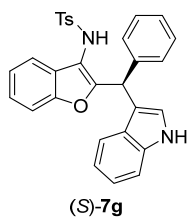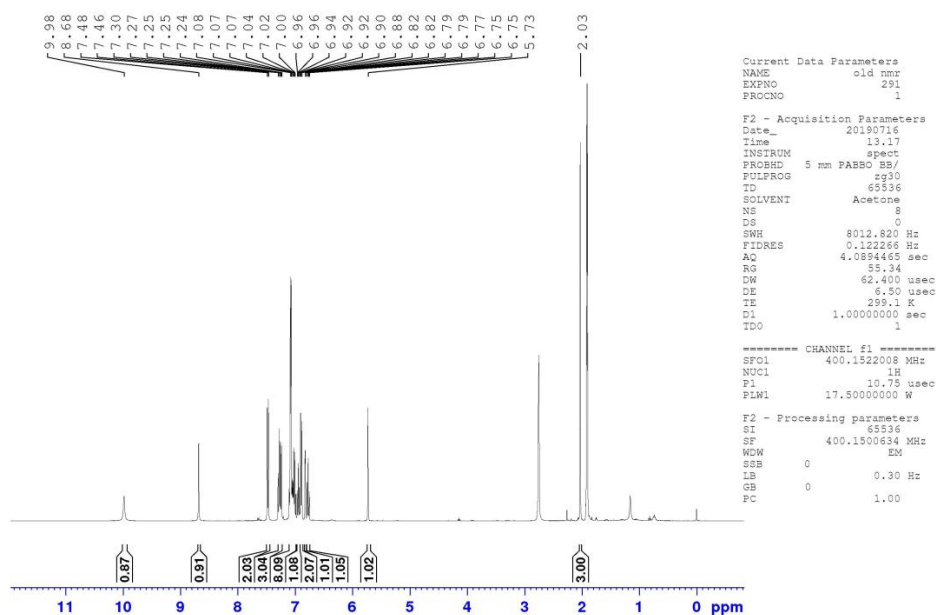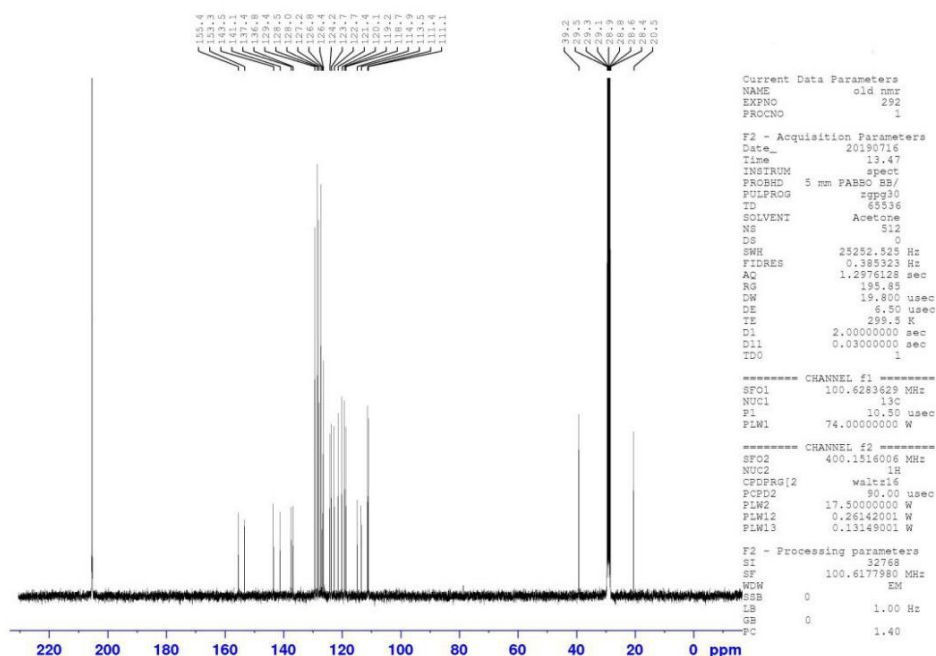

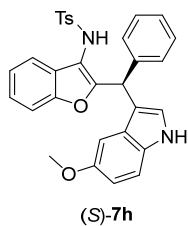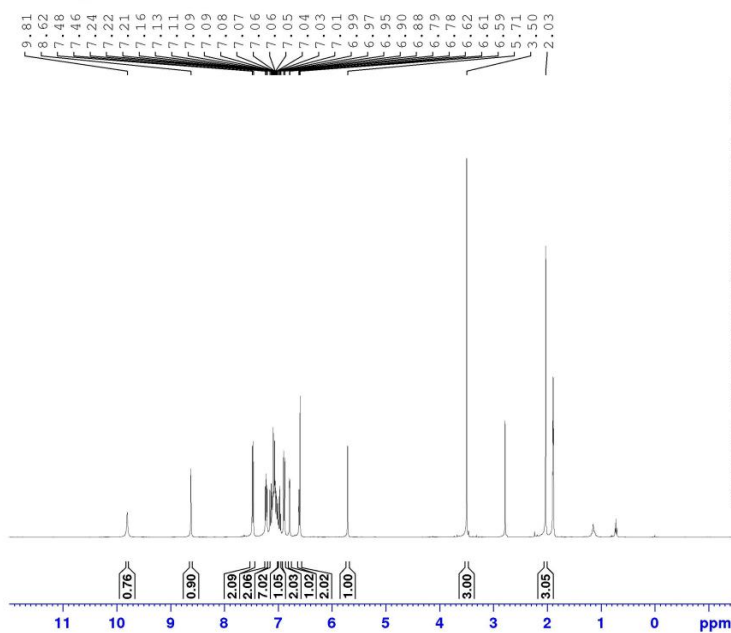

Current Data Parameters  
NAME new nmr  
EXPNO 28  
PROCNO 1

F2 - Acquisition Parameters  
Date\_ 20190717  
Time 0.22 h  
INSTRUM Avance  
PROBHD z116098\_0861 (4mm)30  
PULPROG zgpg30  
TD 65536  
SOLVENT Acetone  
NS 8  
DS 0  
SWH 5555.556 Hz  
FIDRES 0.169542 Hz  
AQ 5.8982401 sec  
RG 60.1347  
DW 90.000 usec  
DE 9.12 usec  
TE 298.8 K  
D1 1.00000000 sec  
TDO 1  
SFO1 400.1321847 MHz  
NUC1 1H  
PC 4.17 usec  
PI 12.50 usec  
PLW1 16.71999931 W

F2 - Processing parameters  
SI 65536  
SF 400.1300711 MHz  
WDW EM  
SSB 0  
LB 0.30 Hz  
GB 0  
PC 1.00

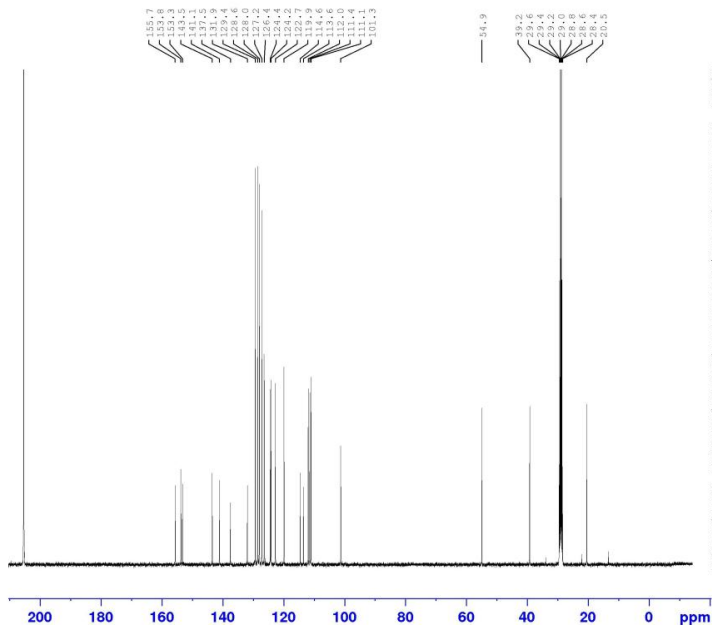

Current Data Parameters  
NAME new nmr  
EXPNO 29  
PROCNO 1

F2 - Acquisition Parameters  
Date\_ 20190717  
Time 0.52 h  
INSTRUM Avance  
PROBHD z116098\_0861 (4mm)30  
PULPROG zgpg30  
TD 65536  
SOLVENT Acetone  
NS 512  
DS 0  
SWH 25000.000 Hz  
FIDRES 0.762939 Hz  
AQ 1.3107200 sec  
RG 67.8168  
DW 20.000 usec  
DE 8.50 usec  
TE 299.4 K  
D1 2.00000000 sec  
D11 0.03000000 sec  
TDO 1  
SFO1 100.6238359 MHz  
NUC1 13C  
PC 4.00 usec  
PI 12.00 usec  
PLW1 75.41799927 W  
SFO2 400.1316005 MHz  
NUC2 1H  
CPDPRG2 waltz65  
PCPD2 80.00 usec  
PLW2 16.71999931 W  
PLW12 0.34549999 W  
PLW13 0.17351000 W

F2 - Processing parameters  
SI 32768  
SF 100.6127685 MHz  
WDW EM  
SSB 0  
LB 1.00 Hz  
GB 0  
PC 1.40

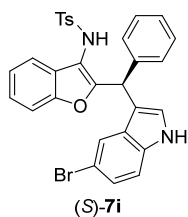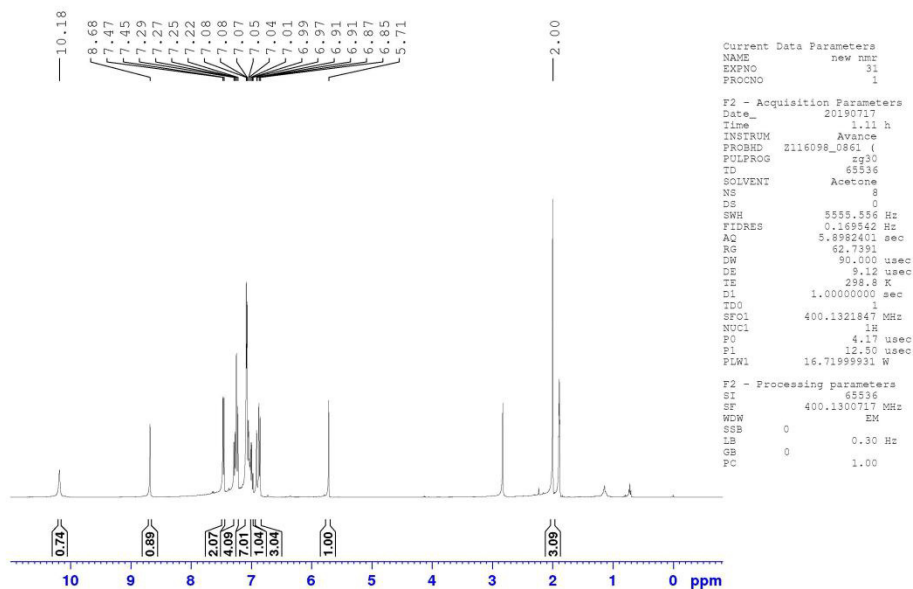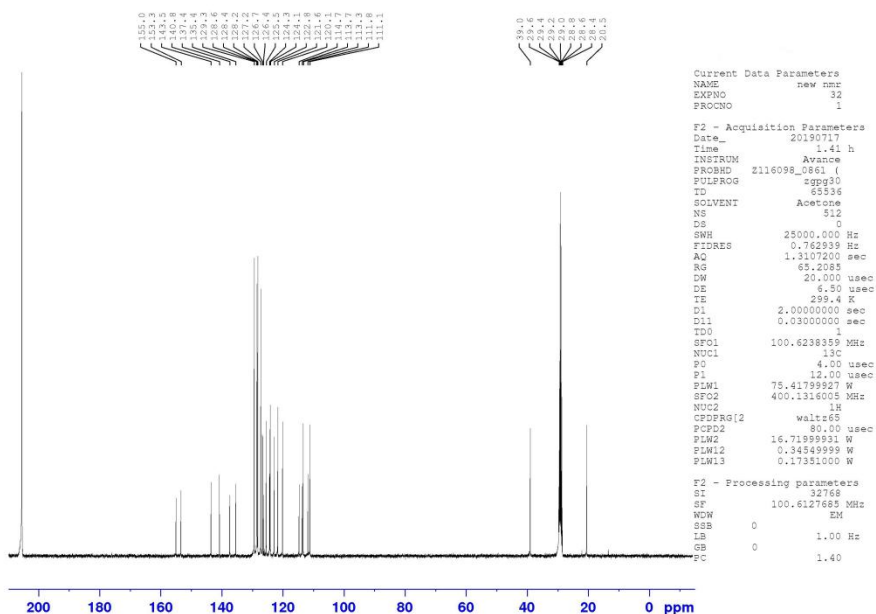



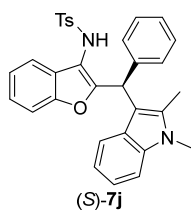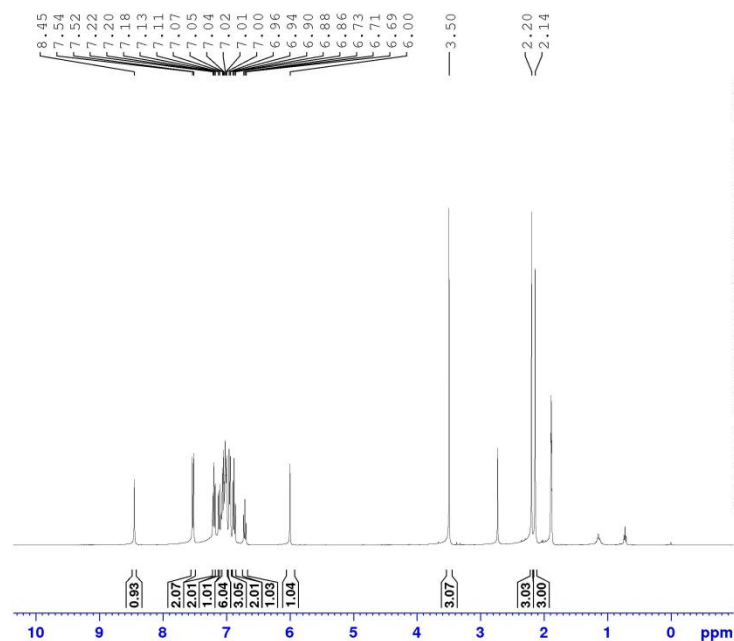

Current Data Parameters  
NAME new nmr  
EXPNO 25  
PROCNO 1

F2 - Acquisition Parameters  
Date\_ 20190716  
Time 23.33 h  
INSTRUM Avance  
PROBHD Z116098\_0861 (   
PULPROG zg30  
TD 65536  
SOLVENT Acetone  
NS 8  
DS 0  
SWH 5555.556 Hz  
FIDRES 0.169542 Hz  
AQ 5.8982401 sec  
RG 58.8853  
DW 90.000 usec  
DE 9.12 usec  
TE 298.7 K  
D1 1.00000000 sec  
TD0 1  
SFO1 400.1321847 MHz  
NUC1 1H  
PC 4.17 usec  
P1 12.50 usec  
PLW1 16.71999931 W

F2 - Processing parameters  
SI 65536  
SF 400.1300728 MHz  
WDW EM  
SSB 0  
GB 0 0.30 Hz  
LB 1.00  
PC 1.00

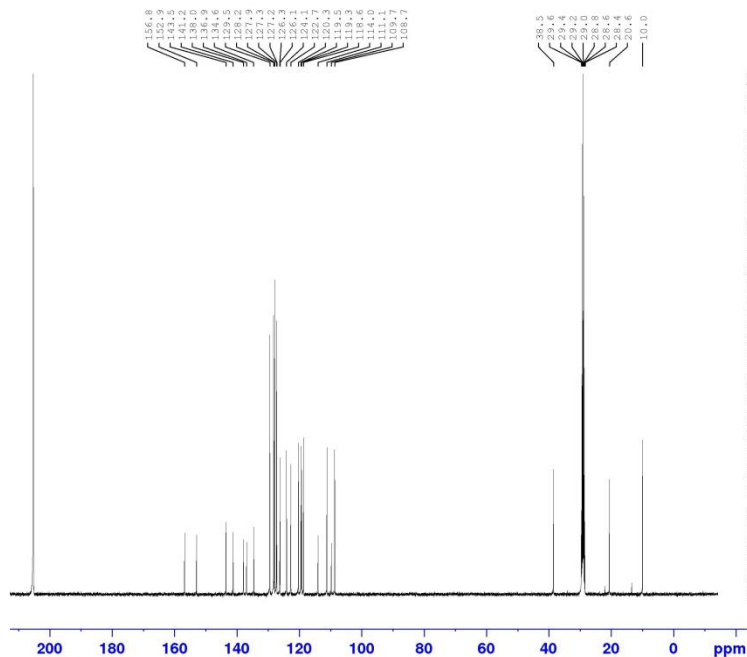

Current Data Parameters  
NAME new nmr  
EXPNO 26  
PROCNO 1

F2 - Acquisition Parameters  
Date\_ 20190717  
Time 0.03 h  
INSTRUM Avance  
PROBHD Z116098\_0861 (   
PULPROG zgpg30  
TD 65536  
SOLVENT Acetone  
NS 512  
DS 0  
SWH 25000.000 Hz  
FIDRES 0.762939 Hz  
AQ 1.3107200 sec  
RG 61.7765  
DW 20.000 usec  
DE 6.50 usec  
TE 299.4 K  
D1 2.00000000 sec  
D11 0.03000000 sec  
TD0 1  
SFO1 100.6238359 MHz  
NUC1 13C  
PC 4.00 usec  
P1 12.00 usec  
PLW1 75.41799927 W  
SFO2 400.1316005 MHz  
NUC2 1H  
CPDPRG2 waltz165  
PCPD2 80.00 usec  
PLW2 16.71999931 W  
PLW12 0.34549999 W  
PLW13 0.17351000 W

F2 - Processing parameters  
SI 32768  
SF 100.6127685 MHz  
WDW EM  
SSB 0  
LB 1.00 Hz  
GB 0  
LB 1.40  
PC 1.40

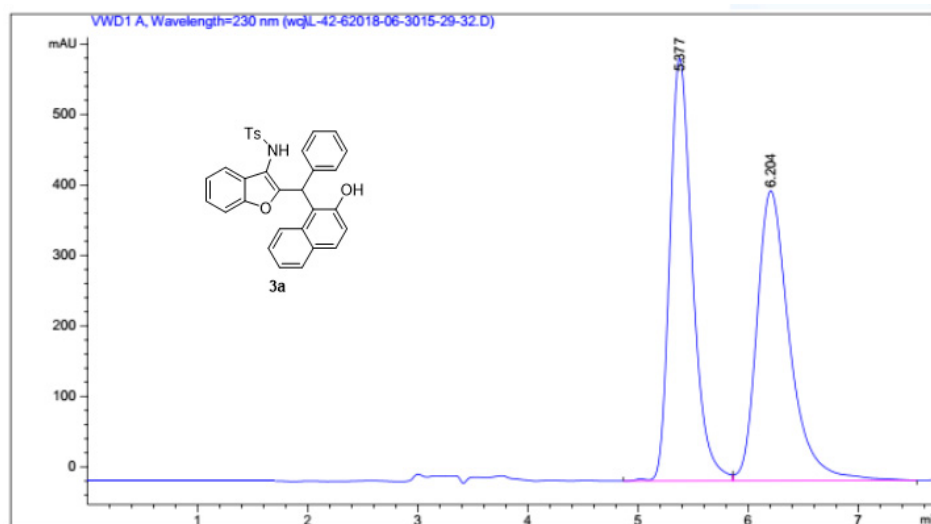

| Peak # | RetTime [min] | Type | Width [min] | Area [mAU*s] | Height [mAU] | Area %  |
|--------|---------------|------|-------------|--------------|--------------|---------|
| 1      | 5.377         | VV R | 0.2171      | 8548.87402   | 599.38977    | 50.1947 |
| 2      | 6.204         | VB   | 0.3126      | 8482.56738   | 411.24854    | 49.8053 |

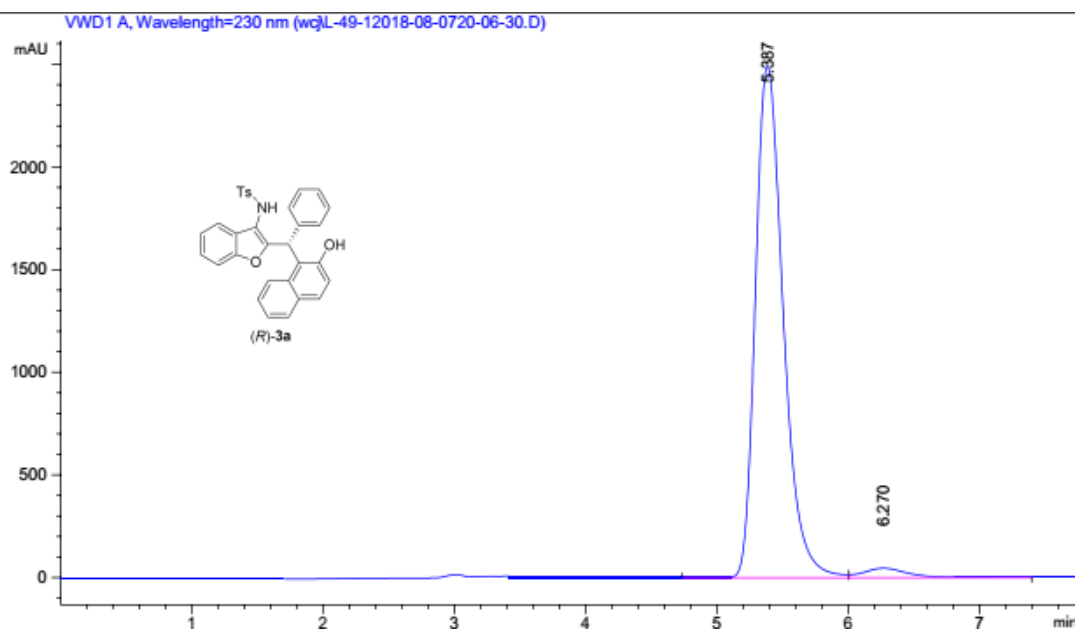

| Peak # | RetTime [min] | Type | Width [min] | Area [mAU*s] | Height [mAU] | Area %  |
|--------|---------------|------|-------------|--------------|--------------|---------|
| 1      | 5.387         | MF   | 0.2450      | 3.66390e4    | 2492.21802   | 96.9803 |
| 2      | 6.270         | FM   | 0.4125      | 1140.85291   | 46.09628     | 3.0197  |

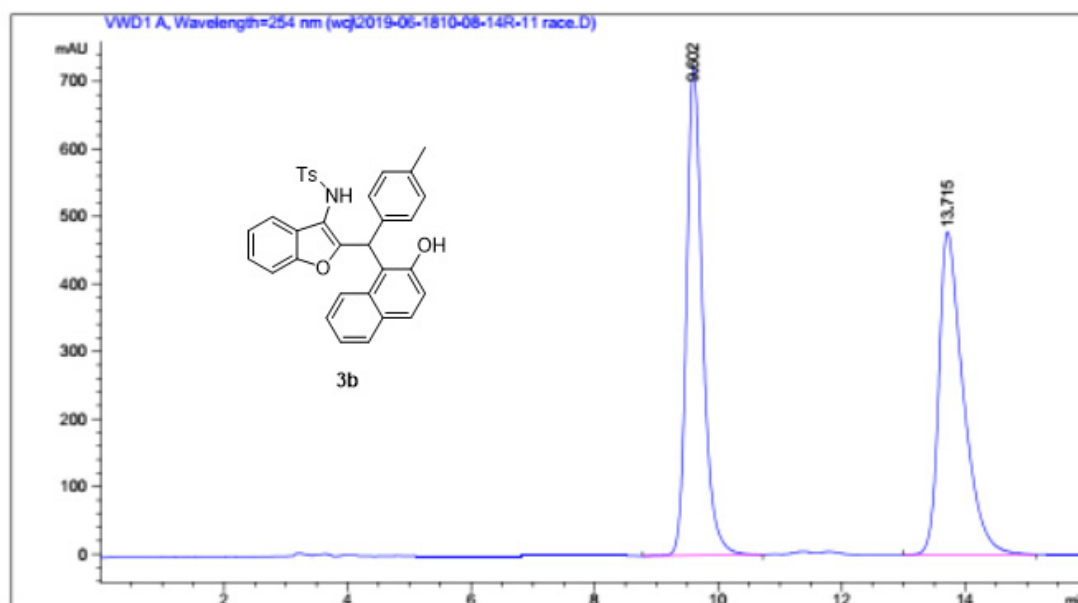

| Peak # | RetTime [min] | Type | Width [min] | Area [mAU*s] | Height [mAU] | Area %  |
|--------|---------------|------|-------------|--------------|--------------|---------|
| 1      | 9.602         | BB   | 0.2728      | 1.30948e4    | 724.80713    | 49.9604 |
| 2      | 13.715        | BB   | 0.4010      | 1.31156e4    | 478.12552    | 50.0396 |

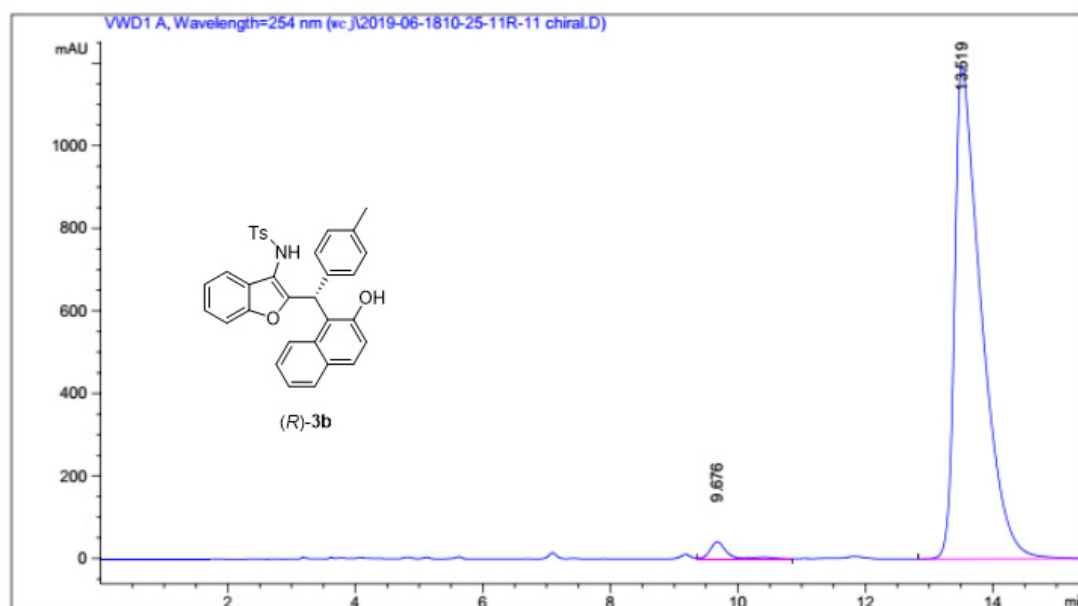

| Peak # | RetTime [min] | Type | Width [min] | Area [mAU*s] | Height [mAU] | Area %  |
|--------|---------------|------|-------------|--------------|--------------|---------|
| 1      | 9.676         | VV R | 0.2506      | 775.81409    | 41.31821     | 2.2004  |
| 2      | 13.519        | BBA  | 0.4081      | 3.44813e4    | 1193.33203   | 97.7996 |

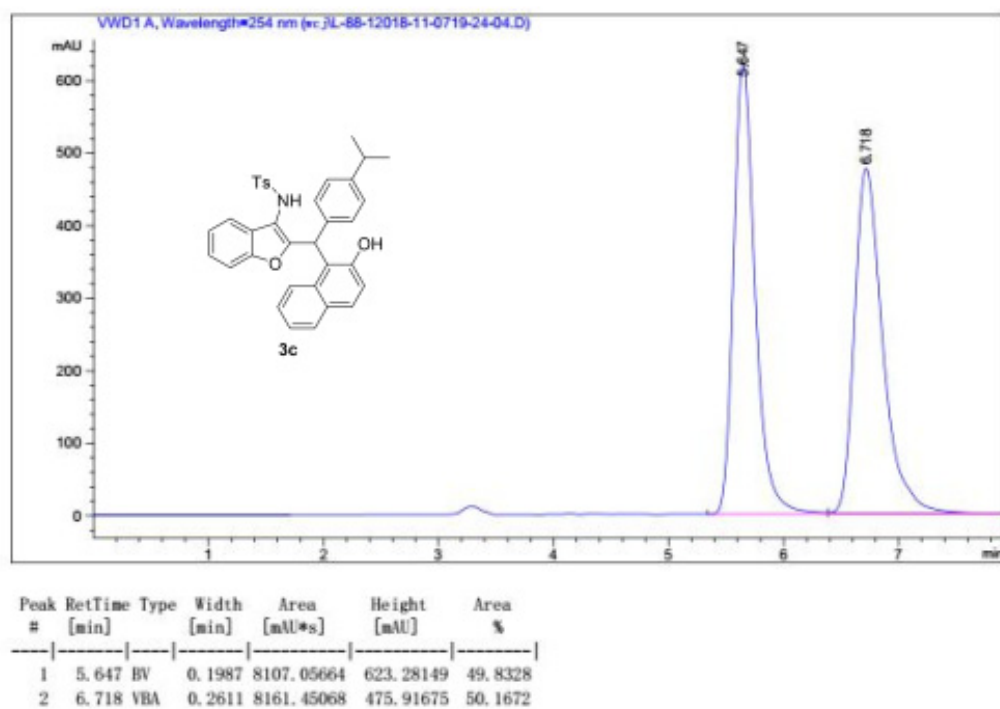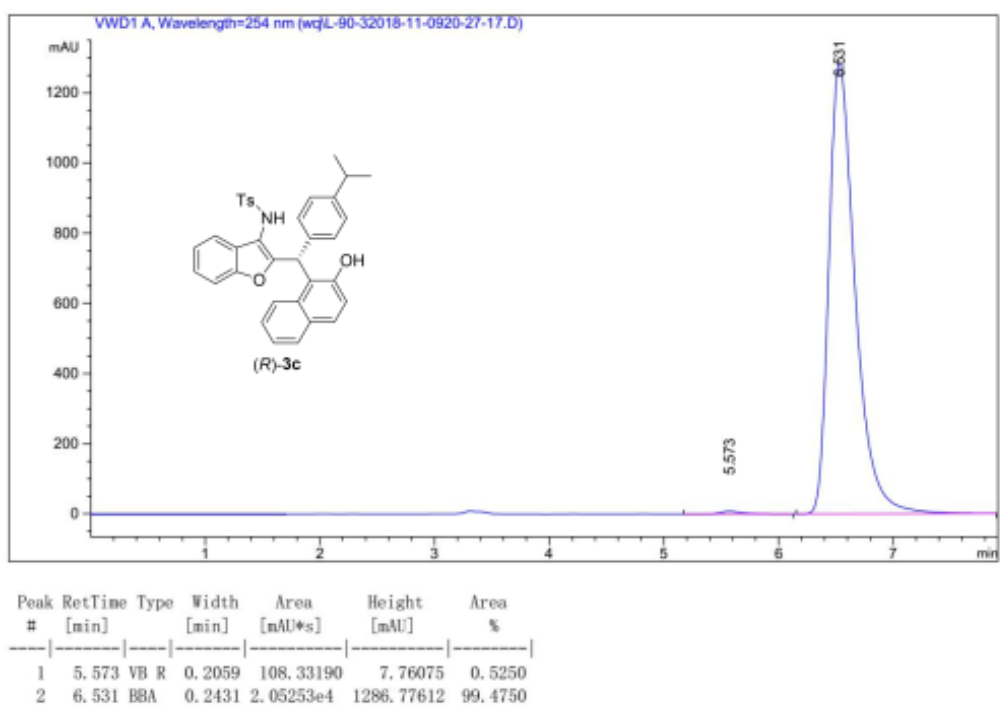

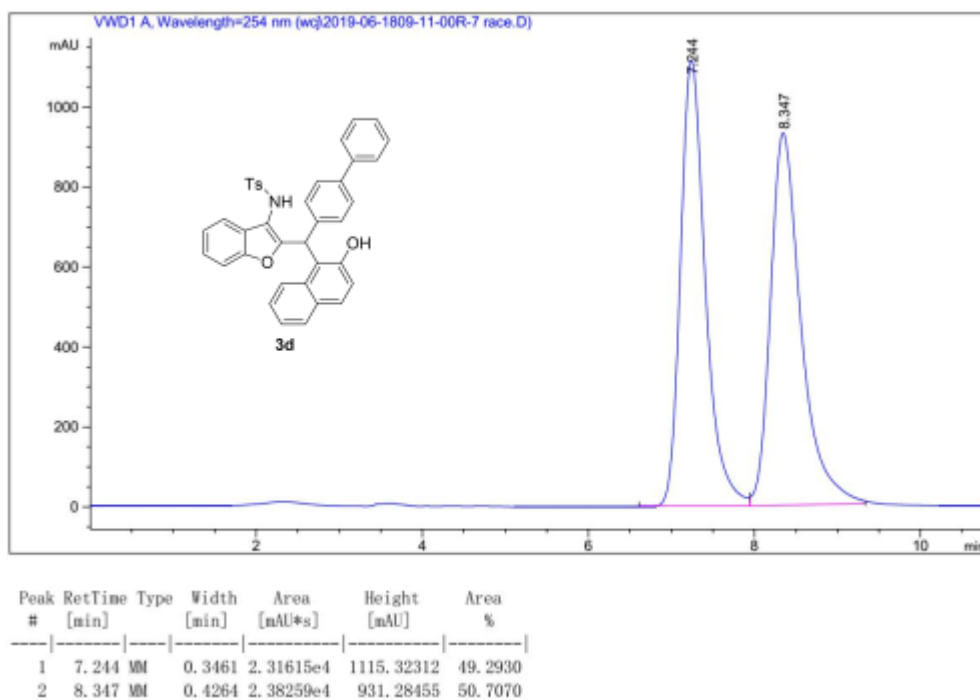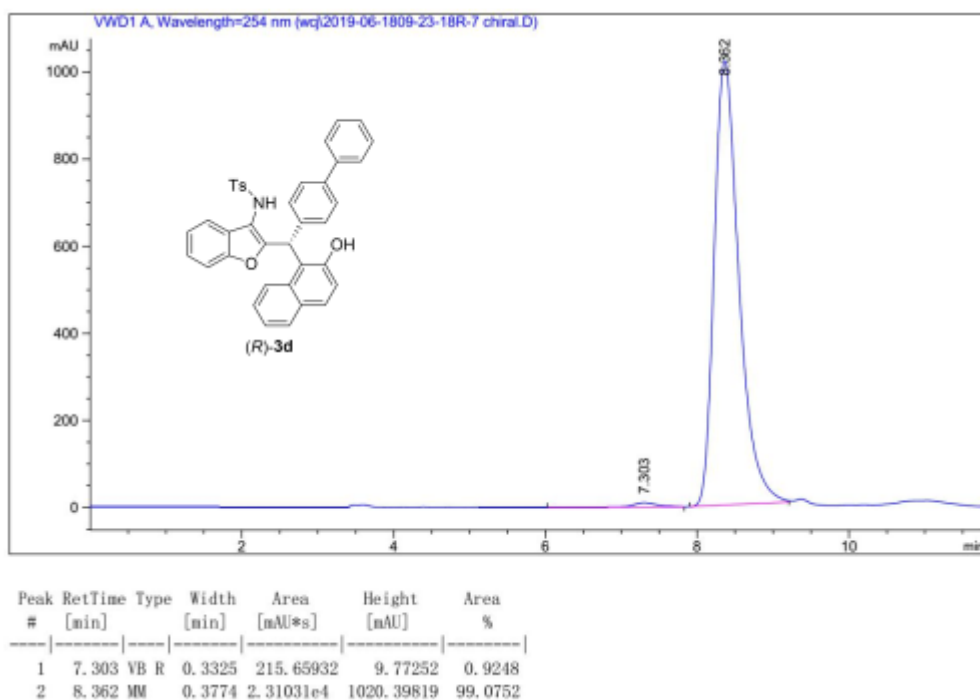

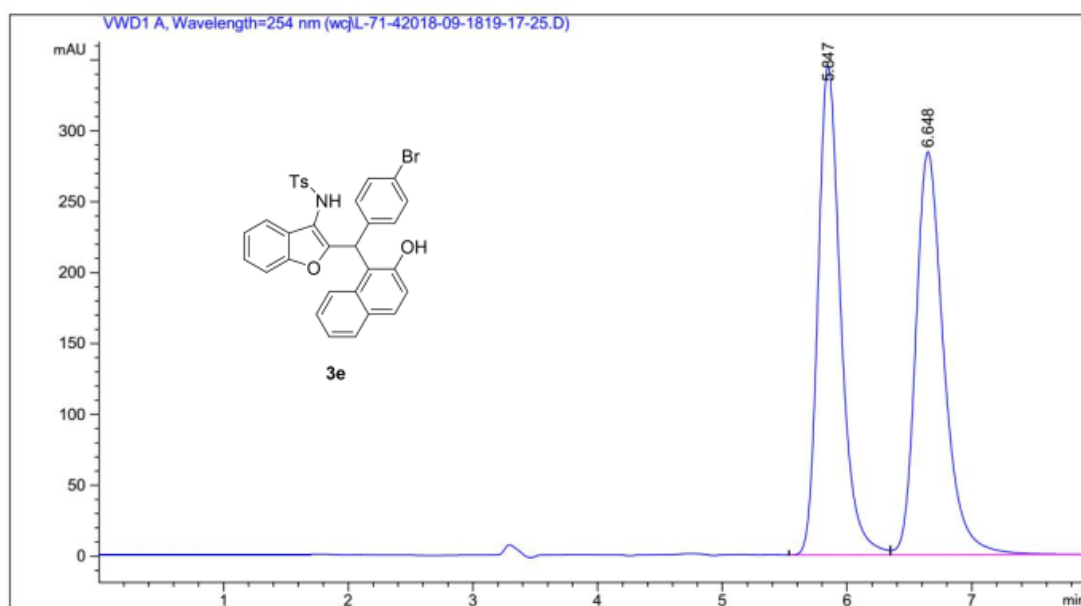

| Peak # | RetTime [min] | Type | Width [min] | Area [mAU*s] | Height [mAU] | Area %  |
|--------|---------------|------|-------------|--------------|--------------|---------|
| 1      | 5.847         | BV   | 0.1923      | 4352.83203   | 344.86273    | 49.5617 |
| 2      | 6.648         | VBA  | 0.2369      | 4429.82275   | 284.14957    | 50.4383 |

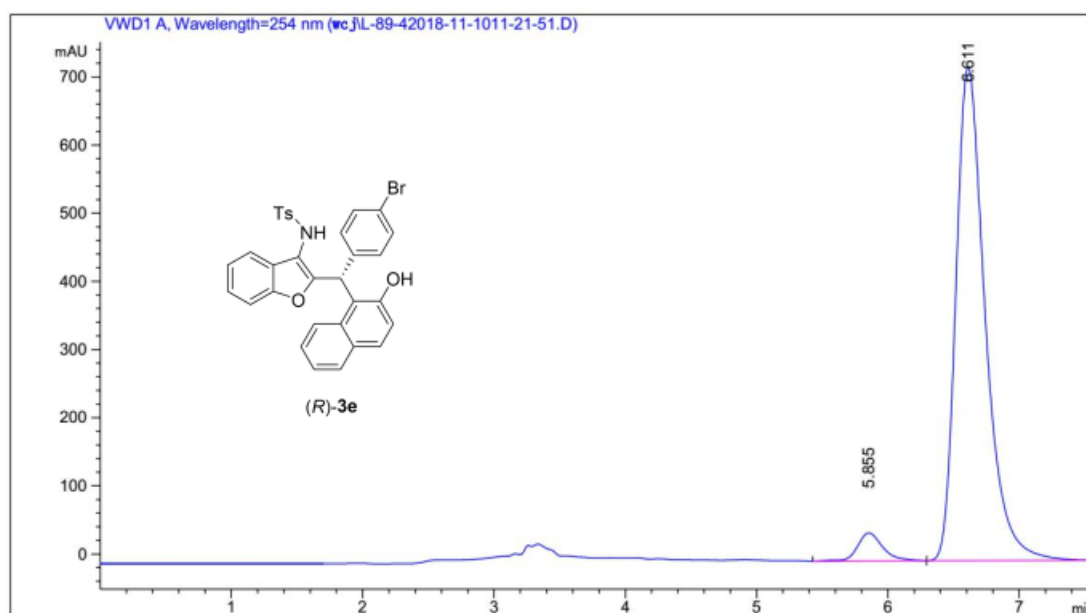

| Peak # | RetTime [min] | Type | Width [min] | Area [mAU*s] | Height [mAU] | Area %  |
|--------|---------------|------|-------------|--------------|--------------|---------|
| 1      | 5.855         | BV   | 0.2035      | 550.72144    | 41.06212     | 4.6848  |
| 2      | 6.611         | VBA  | 0.2344      | 1.12047e4    | 724.74121    | 95.3152 |

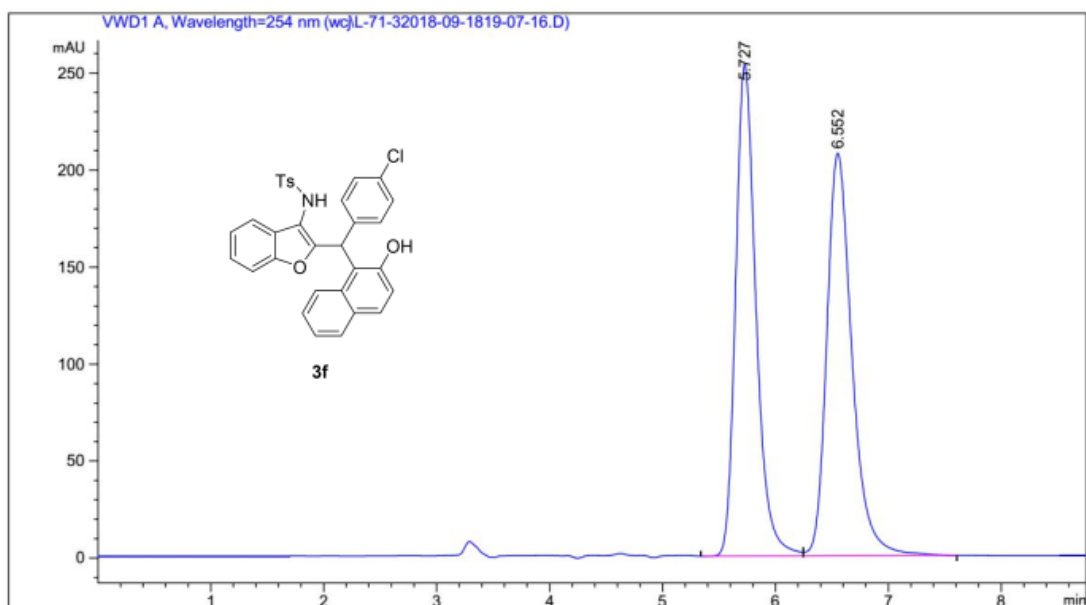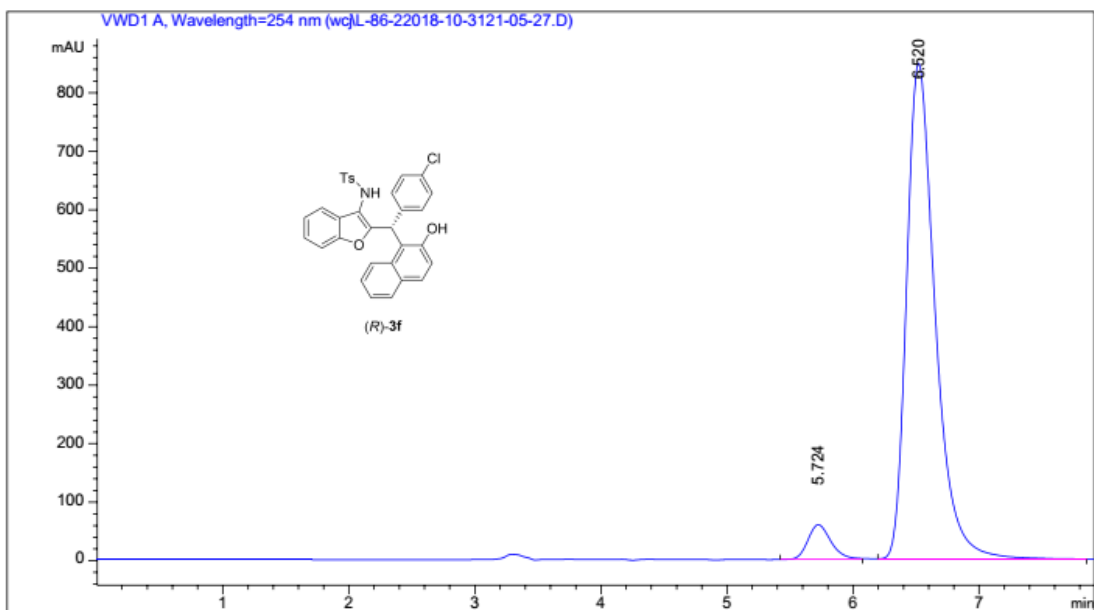

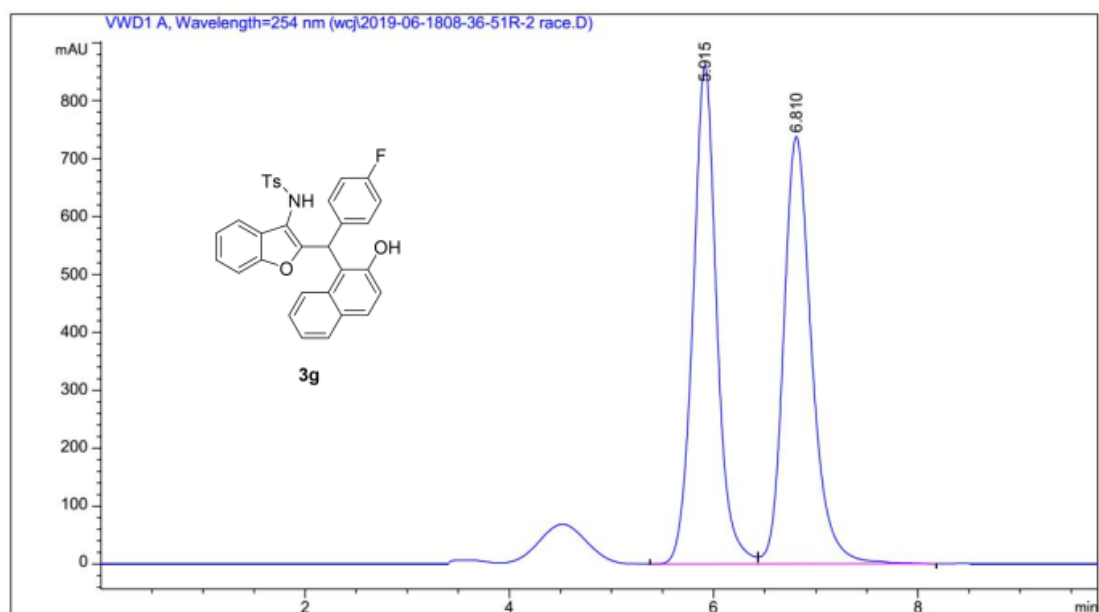

| Peak # | RetTime [min] | Type | Width [min] | Area [mAU*s] | Height [mAU] | Area %  |
|--------|---------------|------|-------------|--------------|--------------|---------|
| 1      | 5.915         | BV   | 0.2433      | 1.38740e4    | 859.62250    | 49.6817 |
| 2      | 6.810         | VB   | 0.2902      | 1.40518e4    | 737.63416    | 50.3183 |

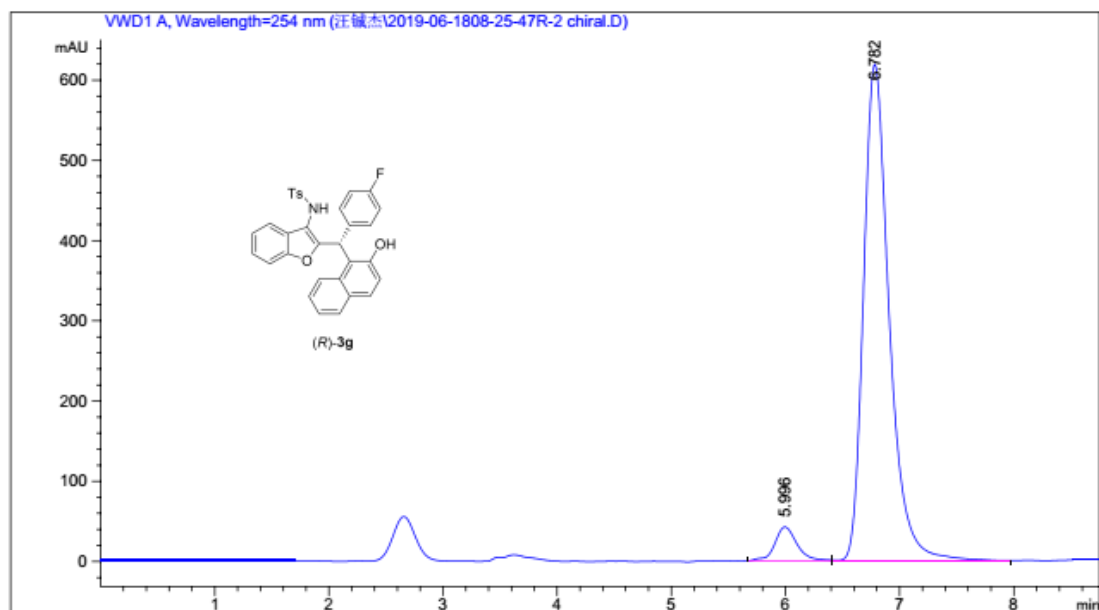

| Peak # | RetTime [min] | Type | Width [min] | Area [mAU*s] | Height [mAU] | Area %  |
|--------|---------------|------|-------------|--------------|--------------|---------|
| 1      | 5.996         | MF   | 0.2281      | 580.09808    | 42.38439     | 5.6575  |
| 2      | 6.782         | FM   | 0.2604      | 9673.48340   | 619.15106    | 94.3425 |



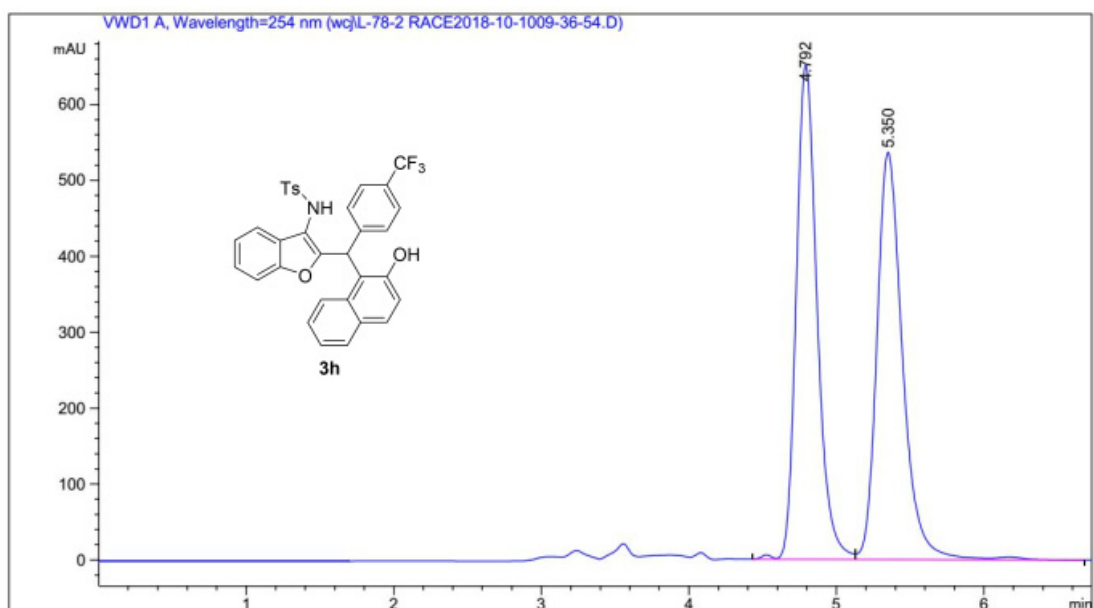

| Peak # | RetTime [min] | Type | Width [min] | Area [mAU*s] | Height [mAU] | Area %  |
|--------|---------------|------|-------------|--------------|--------------|---------|
| 1      | 4.792         | VV R | 0.1499      | 6374.74219   | 650.36310    | 49.5533 |
| 2      | 5.350         | VV R | 0.1835      | 6489.68115   | 536.32739    | 50.4467 |

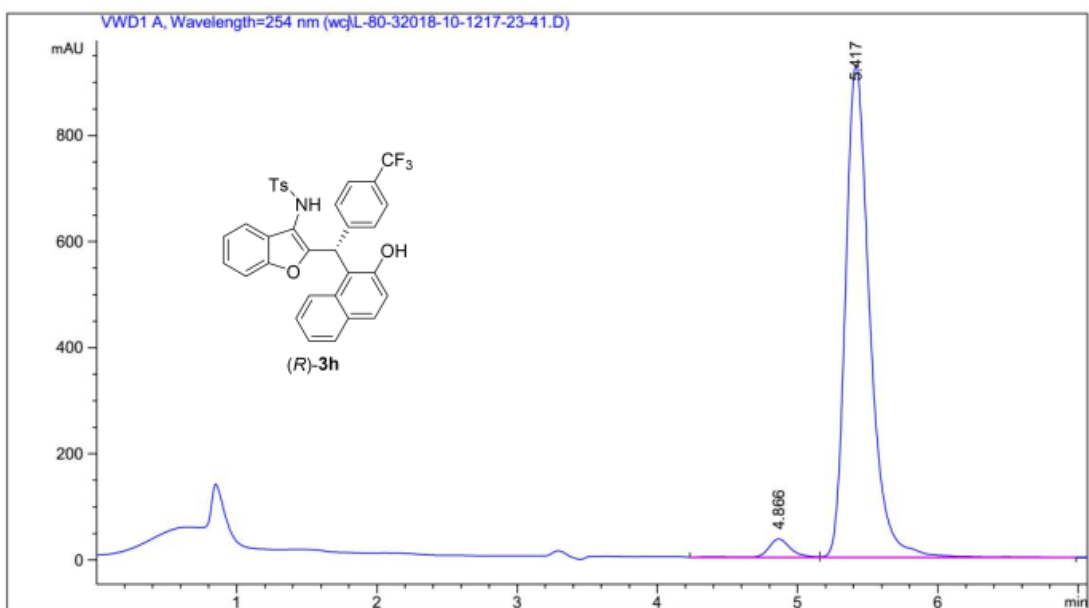

| Peak # | RetTime [min] | Type | Width [min] | Area [mAU*s] | Height [mAU] | Area %  |
|--------|---------------|------|-------------|--------------|--------------|---------|
| 1      | 4.866         | VV R | 0.1709      | 392.83792    | 34.48727     | 3.4066  |
| 2      | 5.417         | VV R | 0.1831      | 1.11387e4    | 927.73663    | 96.5934 |

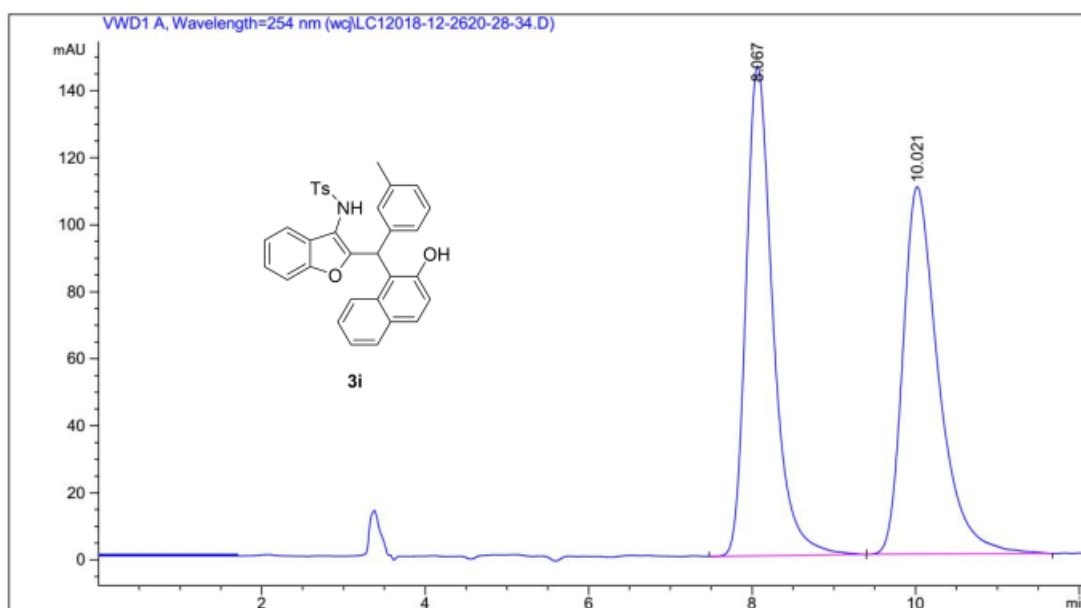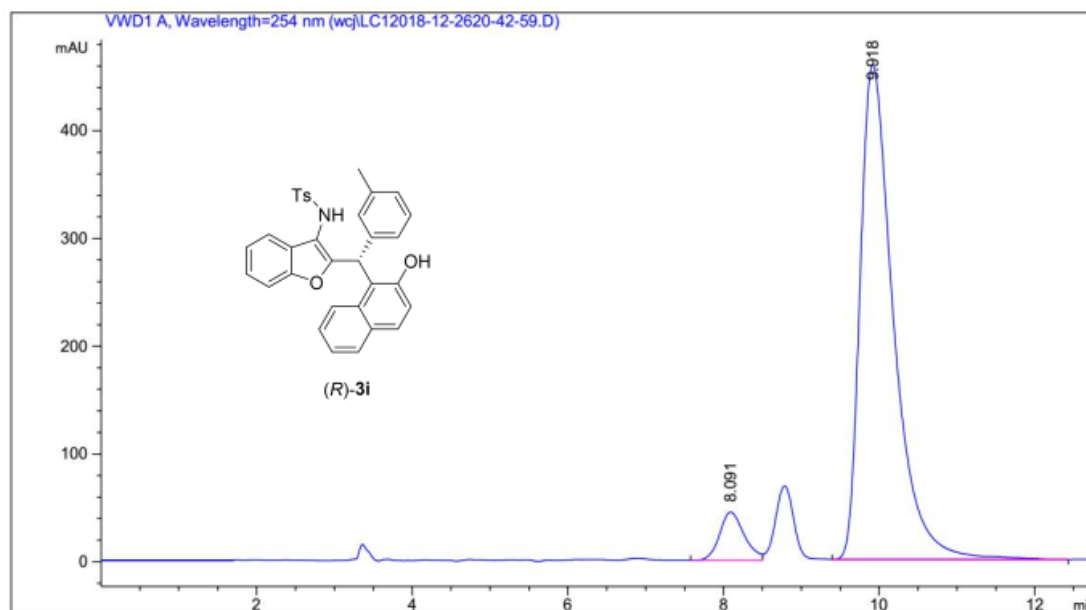

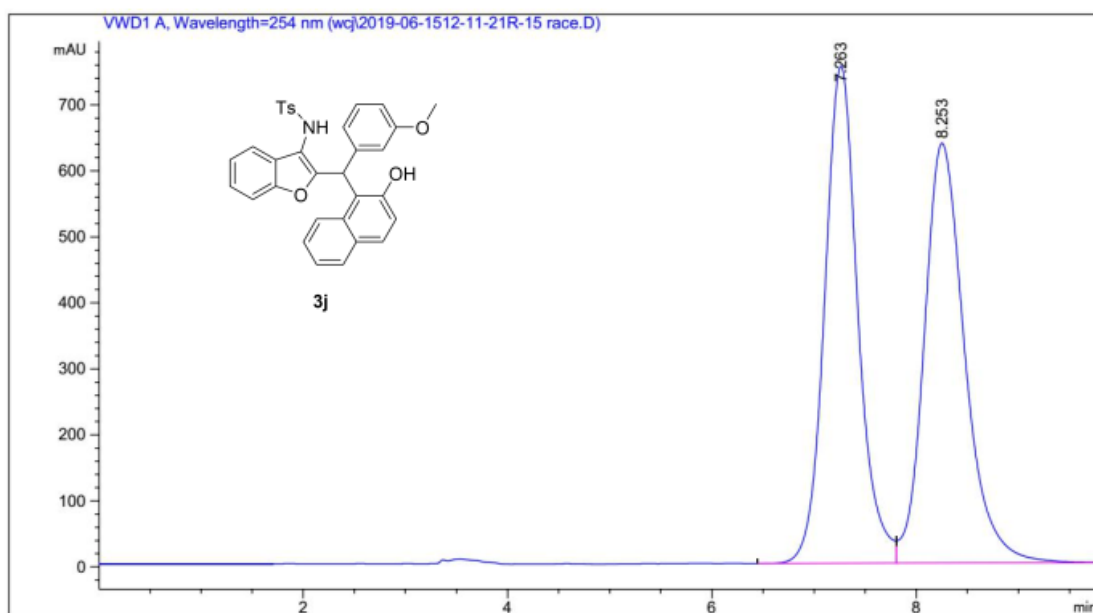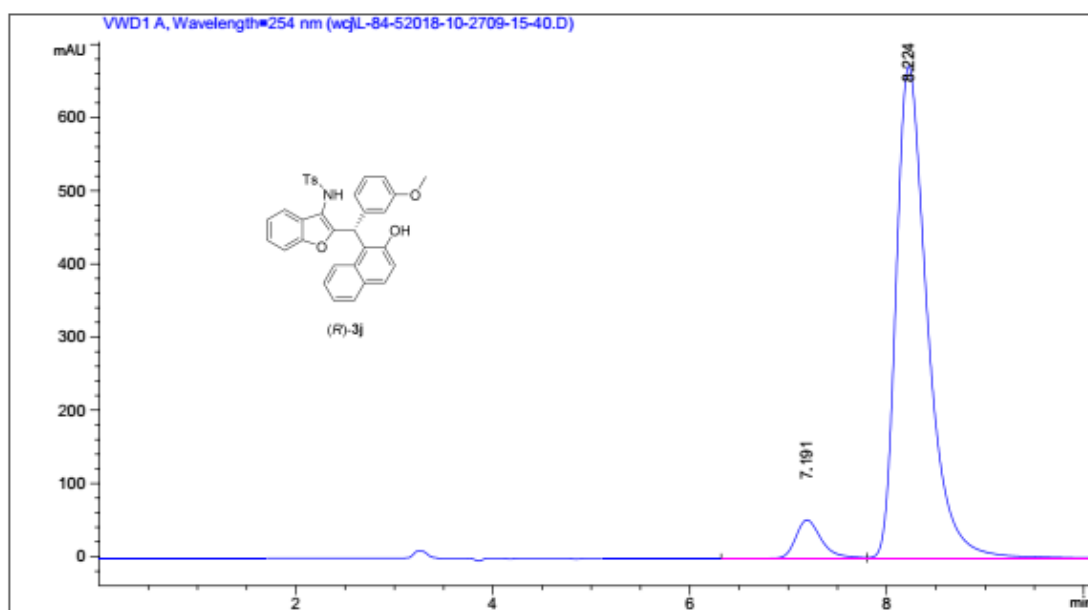

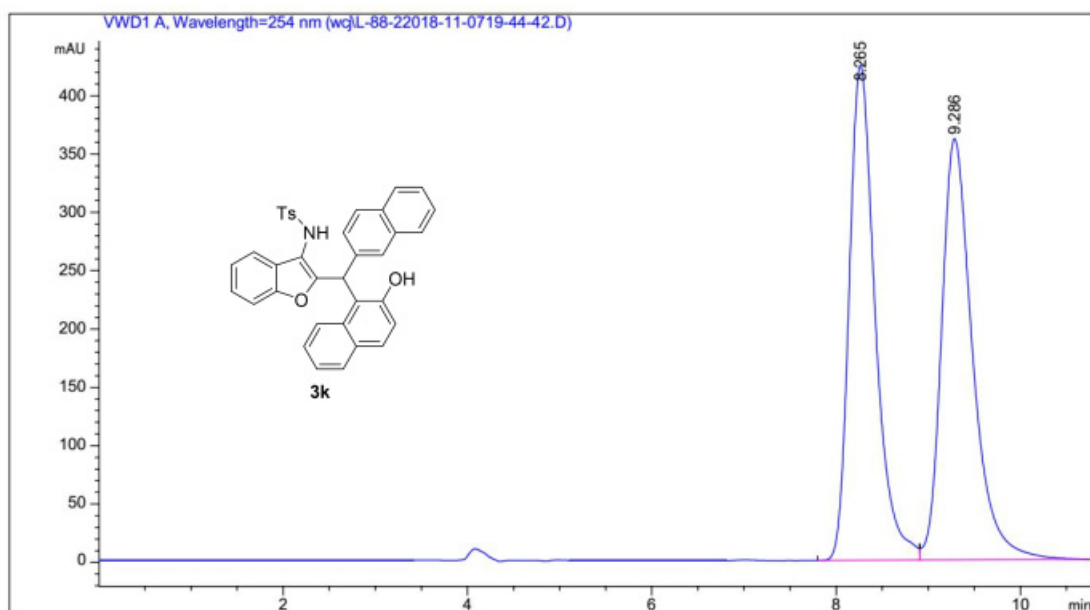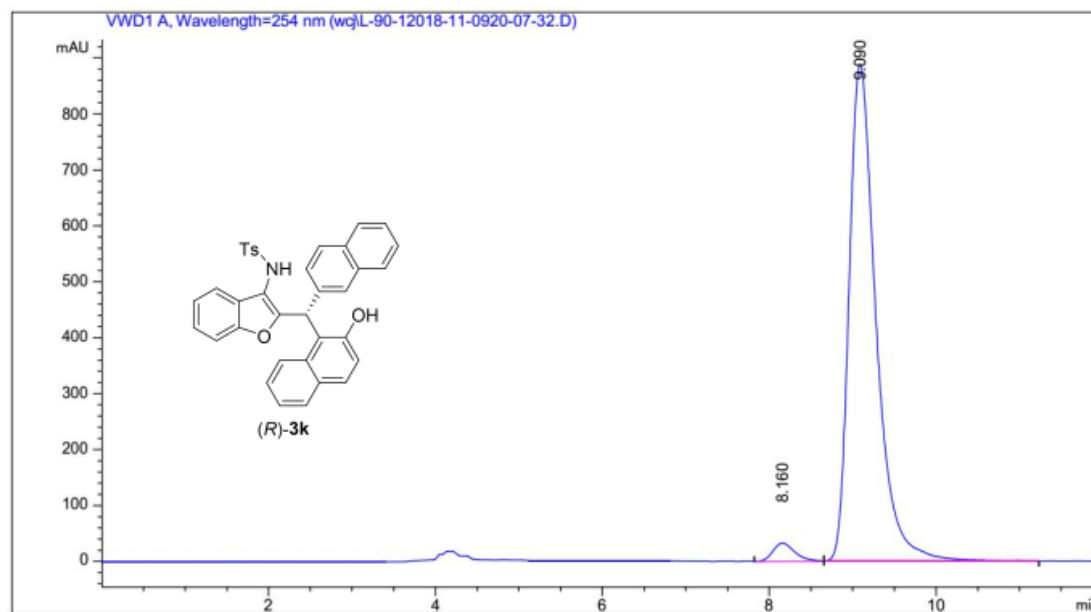

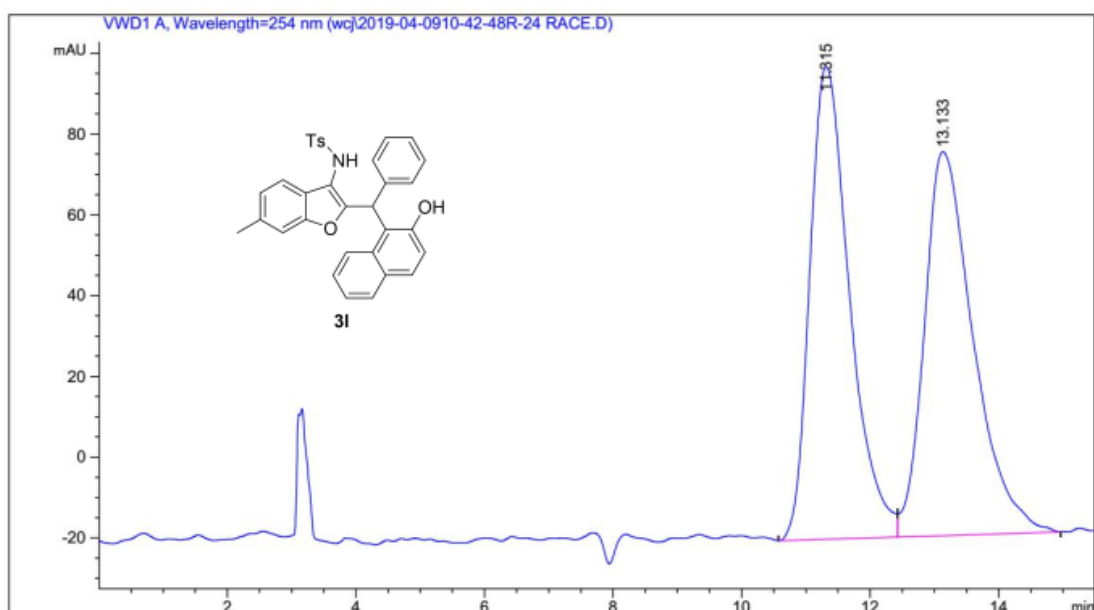

| Peak # | RetTime [min] | Type | Width [min] | Area [mAU*s] | Height [mAU] | Area %  |
|--------|---------------|------|-------------|--------------|--------------|---------|
| 1      | 11.315        | BV   | 0.6557      | 5034.02979   | 117.06155    | 50.0282 |
| 2      | 13.133        | VB   | 0.7640      | 5028.34473   | 95.07822     | 49.9718 |

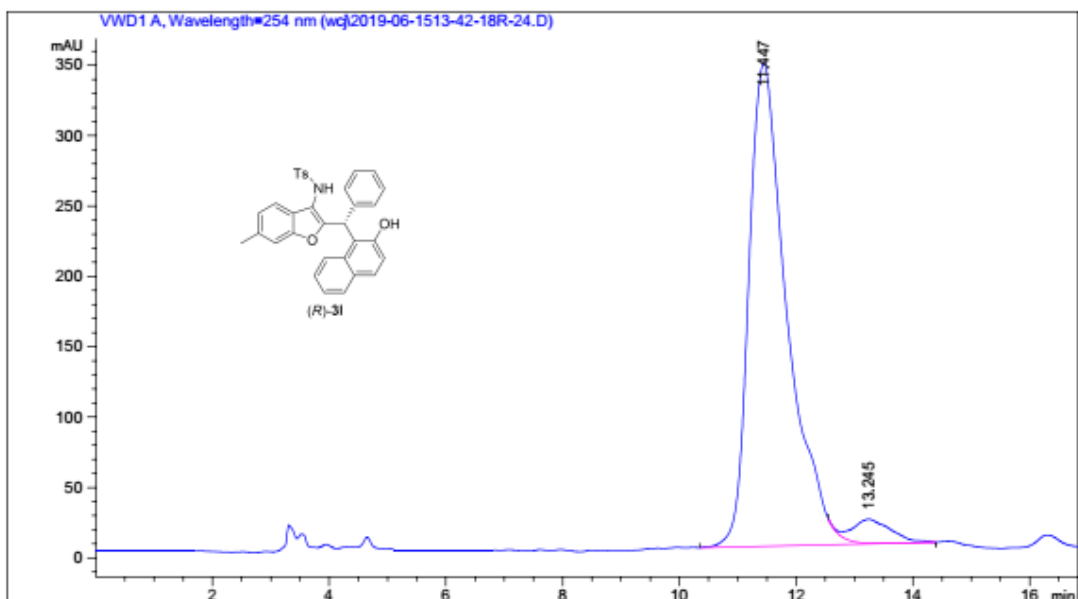

| Peak # | RetTime [min] | Type | Width [min] | Area [mAU*s] | Height [mAU] | Area %  |
|--------|---------------|------|-------------|--------------|--------------|---------|
| 1      | 11.447        | BV R | 0.6918      | 1.56277e4    | 343.49097    | 95.2950 |
| 2      | 13.245        | VB E | 0.6290      | 771.58673    | 16.92014     | 4.7050  |

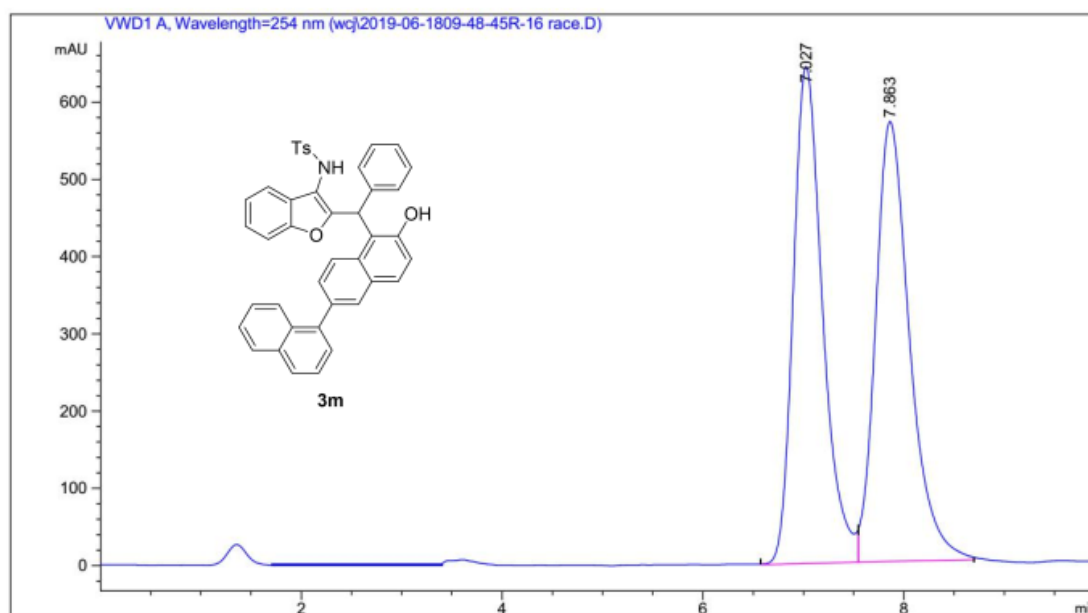

| Peak # | RetTime [min] | Type | Width [min] | Area [mAU*s] | Height [mAU] | Area %  |
|--------|---------------|------|-------------|--------------|--------------|---------|
| 1      | 7.027         | MM   | 0.3383      | 1.30573e4    | 643.25696    | 49.3267 |
| 2      | 7.863         | MM   | 0.3926      | 1.34138e4    | 569.36920    | 50.6733 |

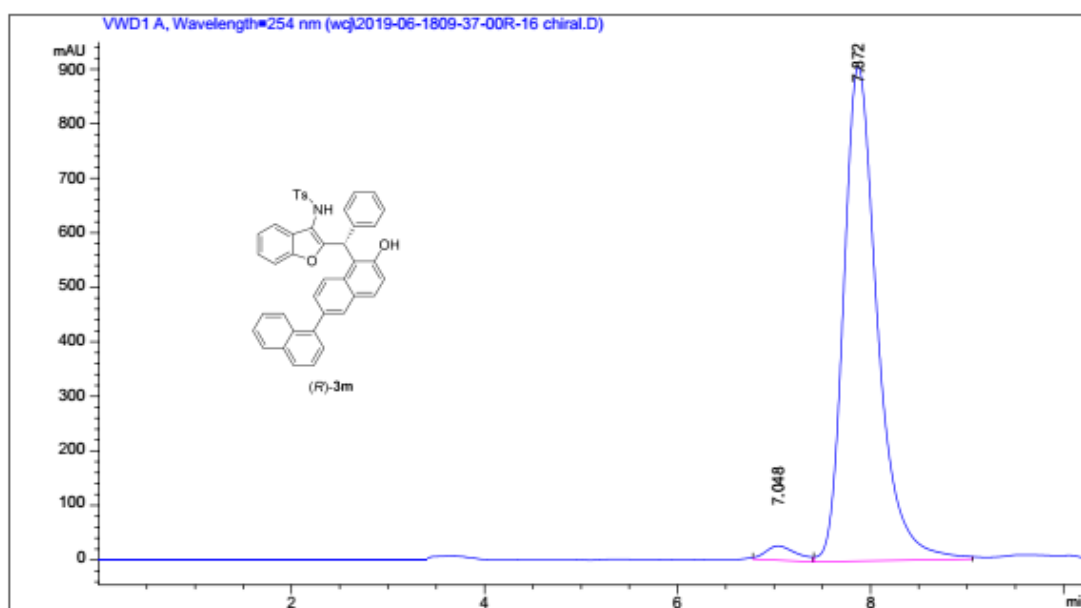

| Peak # | RetTime [min] | Type | Width [min] | Area [mAU*s] | Height [mAU] | Area %  |
|--------|---------------|------|-------------|--------------|--------------|---------|
| 1      | 7.048         | MM   | 0.3690      | 575.36865    | 25.98837     | 2.5573  |
| 2      | 7.872         | MM   | 0.4031      | 2.19234e4    | 906.44177    | 97.4427 |

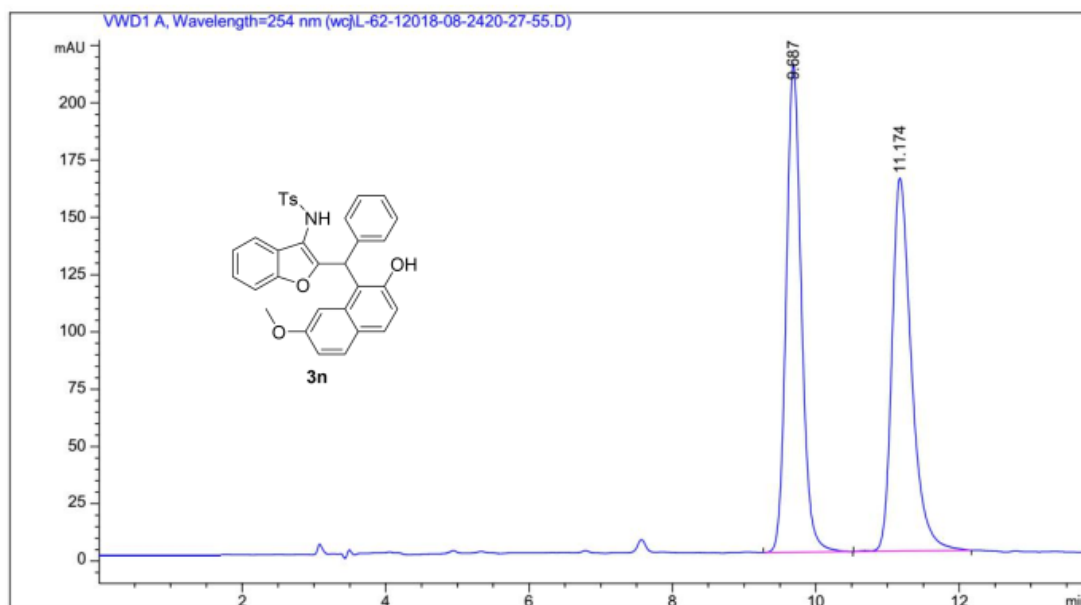

| Peak # | RetTime [min] | Type | Width [min] | Area [mAU*s] | Height [mAU] | Area %  |
|--------|---------------|------|-------------|--------------|--------------|---------|
| 1      | 9.687         | BB   | 0.2262      | 3124.36182   | 212.90576    | 50.4254 |
| 2      | 11.174        | VB R | 0.2852      | 3071.64966   | 162.75993    | 49.5746 |

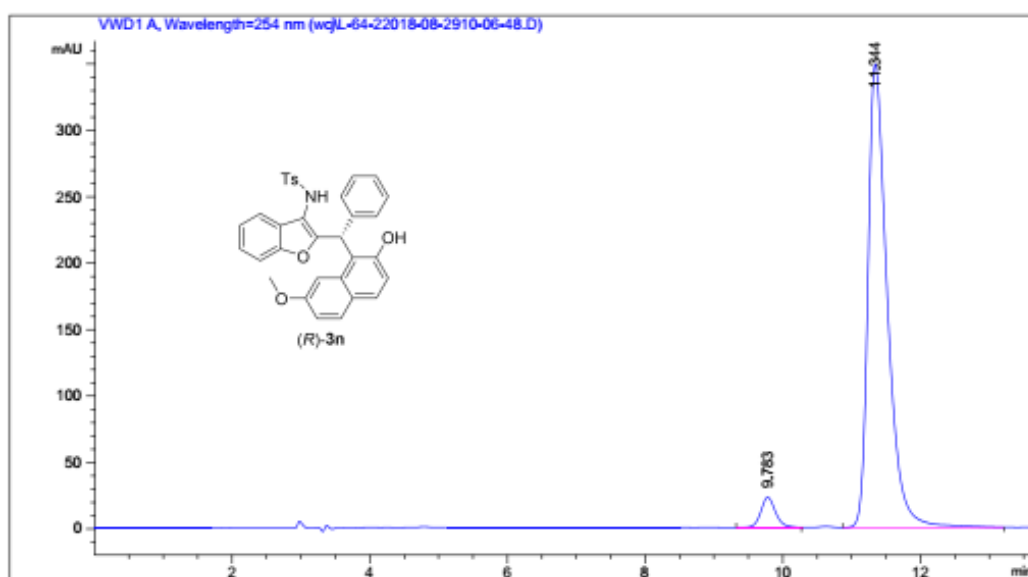

| Peak # | RetTime [min] | Type | Width [min] | Area [mAU*s] | Height [mAU] | Area %  |
|--------|---------------|------|-------------|--------------|--------------|---------|
| 1      | 9.783         | BB   | 0.2272      | 336.87836    | 22.69812     | 4.7451  |
| 2      | 11.344        | BB   | 0.2891      | 6762.60303   | 348.89798    | 95.2549 |

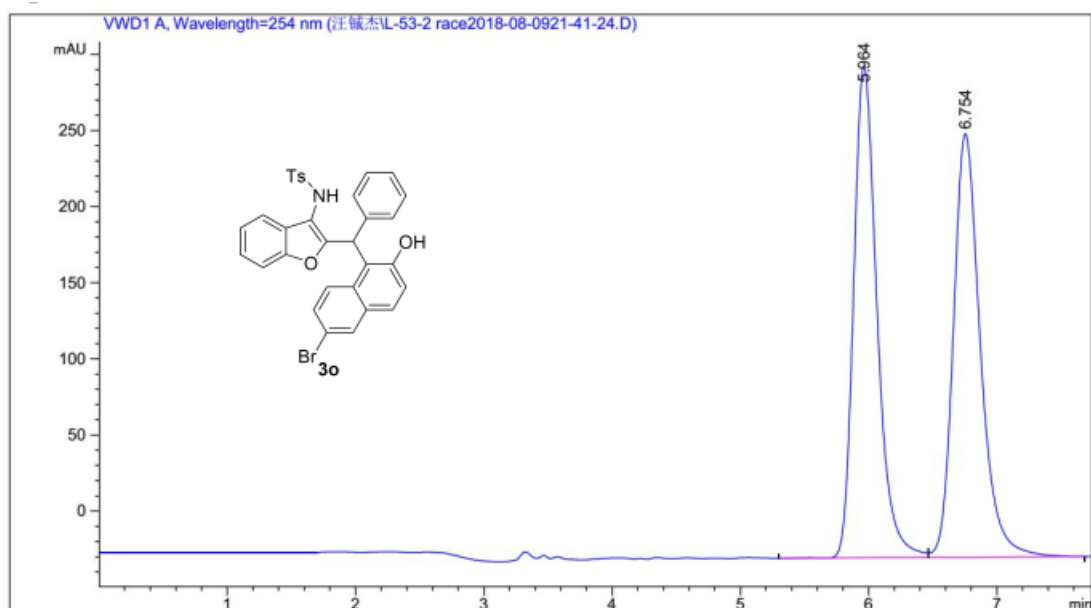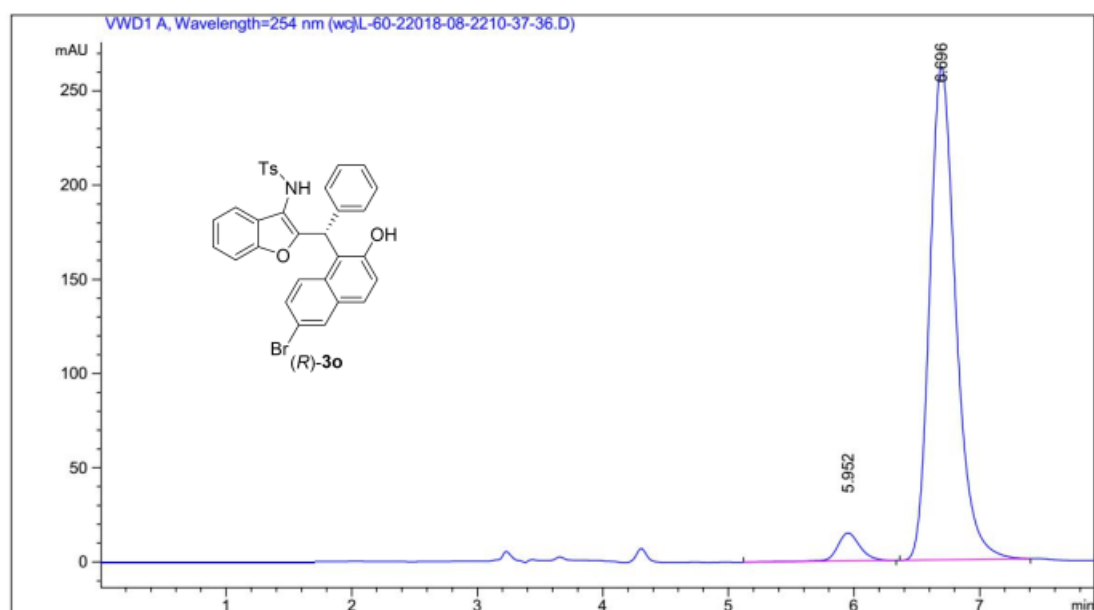



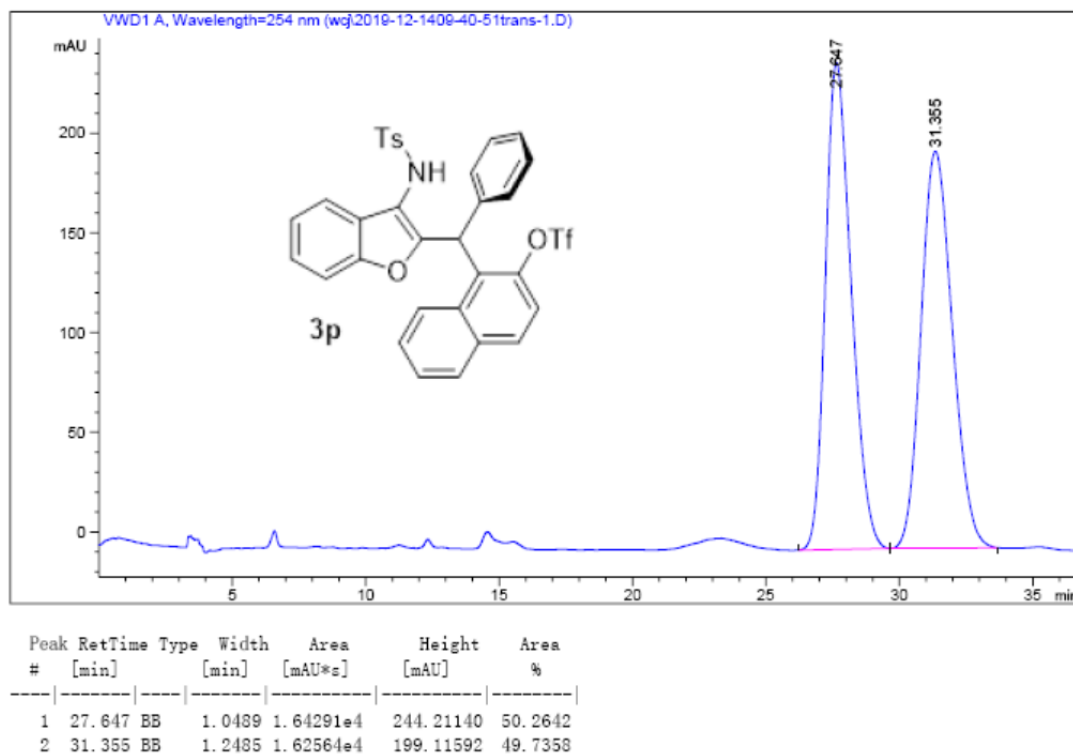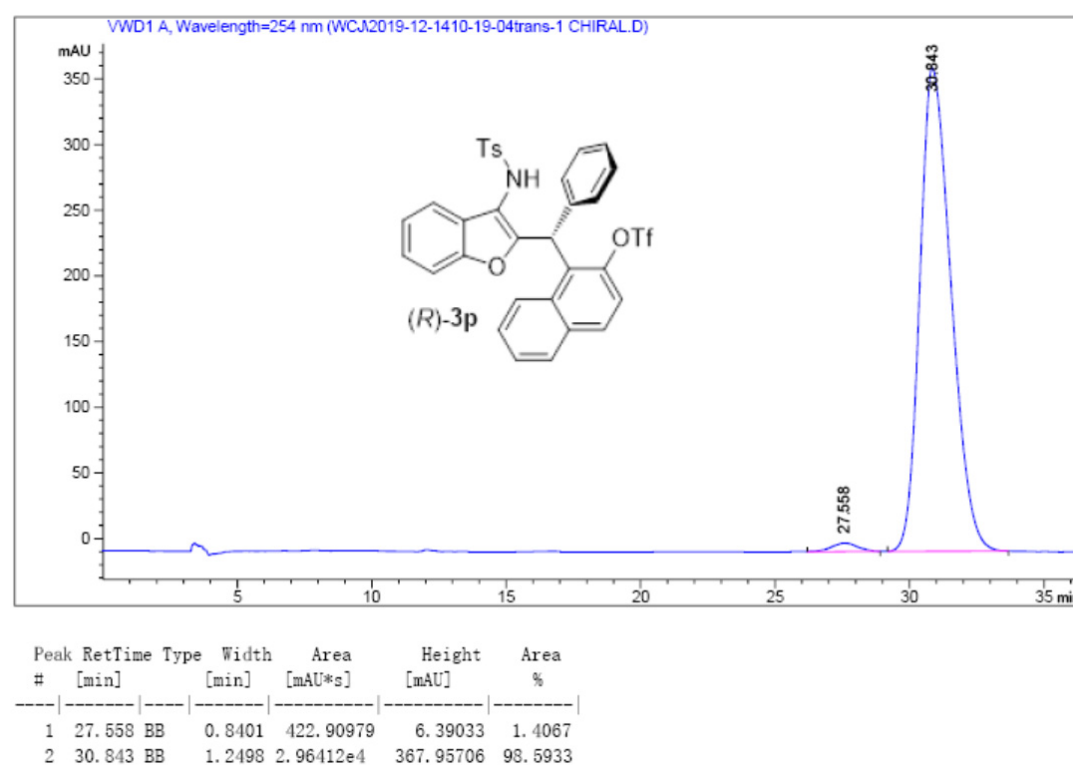

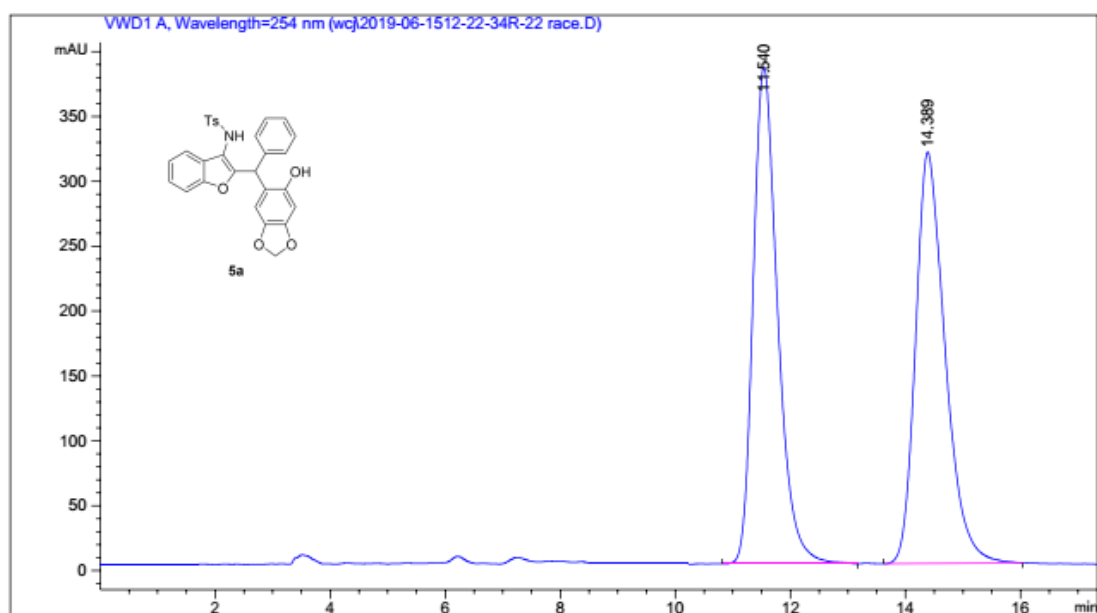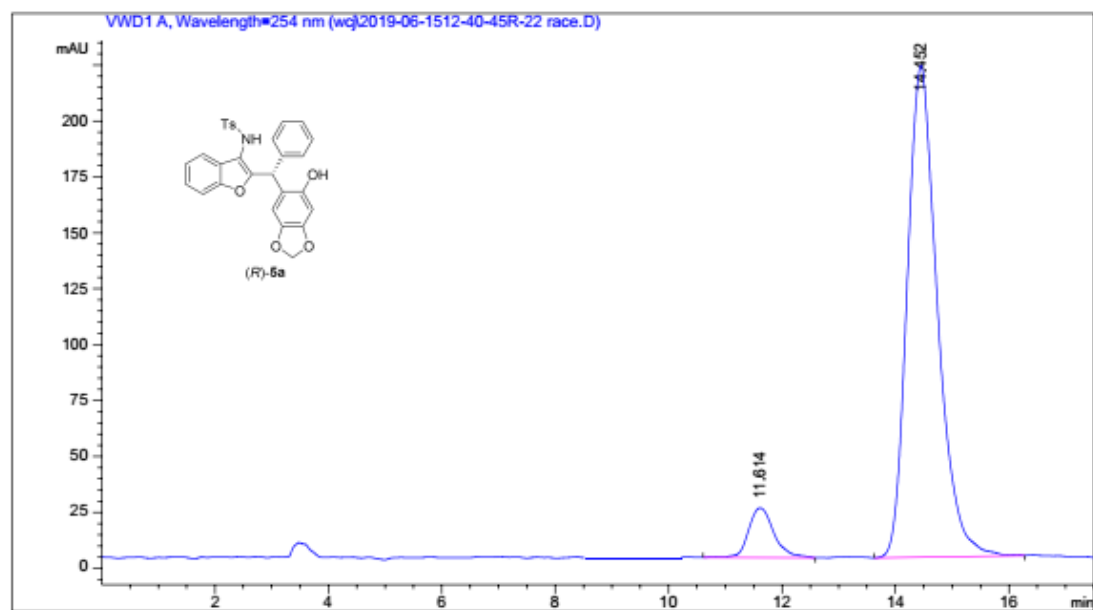

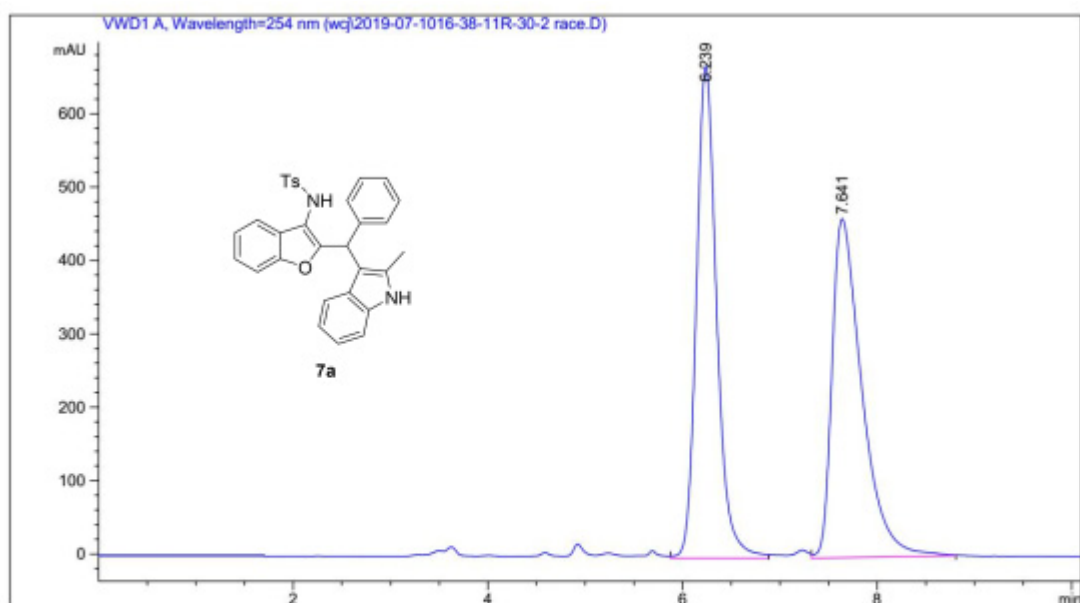

| Peak # | RetTime [min] | Type | Width [min] | Area [mAU*s] | Height [mAU] | Area %  |
|--------|---------------|------|-------------|--------------|--------------|---------|
| 1      | 6.239         | MM   | 0.2413      | 9704.95996   | 670.35870    | 49.7312 |
| 2      | 7.641         | MM   | 0.3542      | 9809.86719   | 461.59543    | 50.2688 |

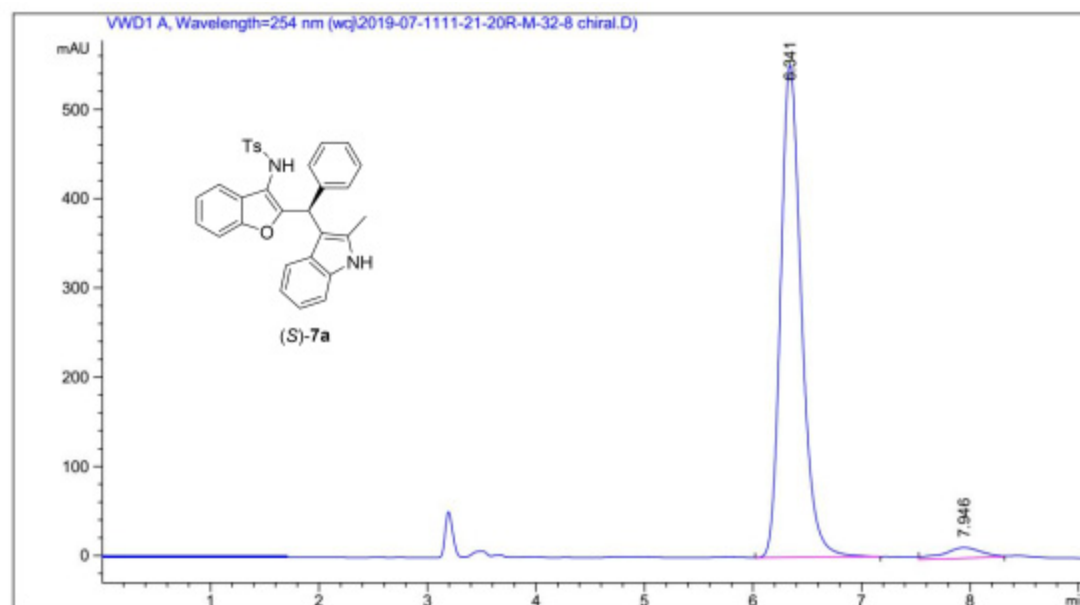

| Peak # | RetTime [min] | Type | Width [min] | Area [mAU*s] | Height [mAU] | Area %  |
|--------|---------------|------|-------------|--------------|--------------|---------|
| 1      | 6.341         | BB   | 0.2028      | 7320.74268   | 551.60553    | 96.1450 |
| 2      | 7.946         | MM   | 0.4093      | 293.52786    | 11.95253     | 3.8550  |

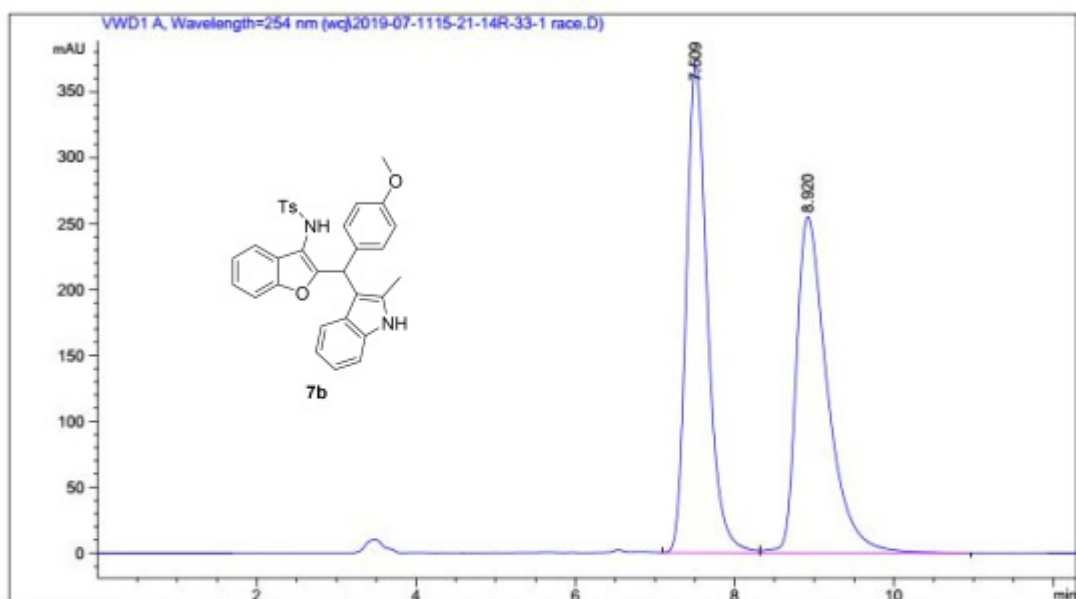

| Peak # | RetTime [min] | Type | Width [min] | Area [mAU*s] | Height [mAU] | Area %  |
|--------|---------------|------|-------------|--------------|--------------|---------|
| 1      | 7.509         | BV   | 0.2821      | 6821.78271   | 370.02179    | 49.7532 |
| 2      | 8.920         | VB   | 0.4071      | 6889.47168   | 255.10687    | 50.2468 |

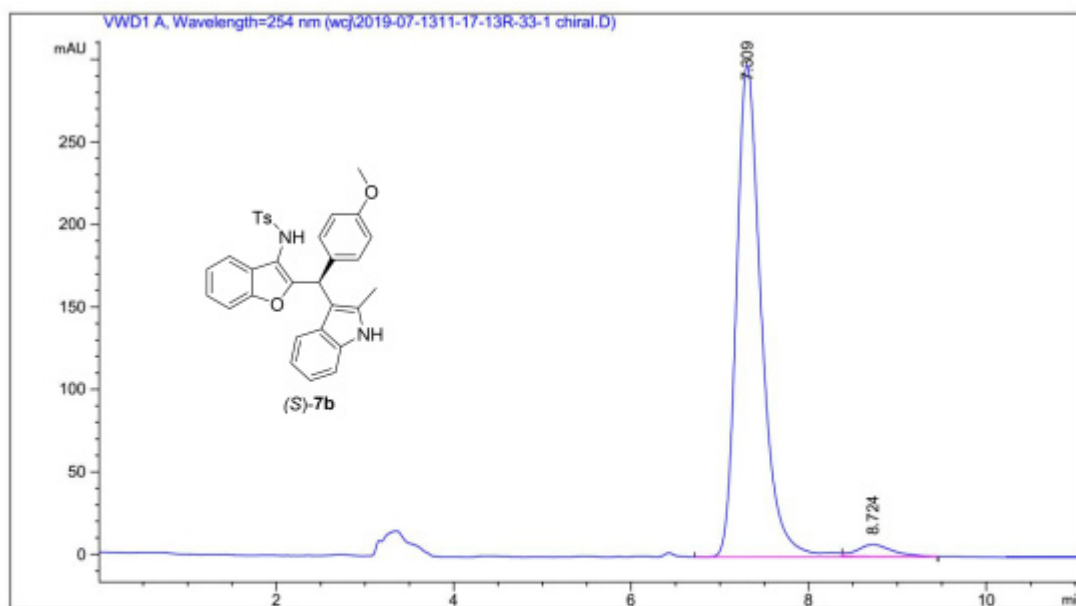

| Peak # | RetTime [min] | Type | Width [min] | Area [mAU*s] | Height [mAU] | Area %  |
|--------|---------------|------|-------------|--------------|--------------|---------|
| 1      | 7.309         | BV R | 0.2932      | 5806.58008   | 298.16077    | 96.6673 |
| 2      | 8.724         | VB E | 0.3944      | 200.18649    | 7.29040      | 3.3327  |

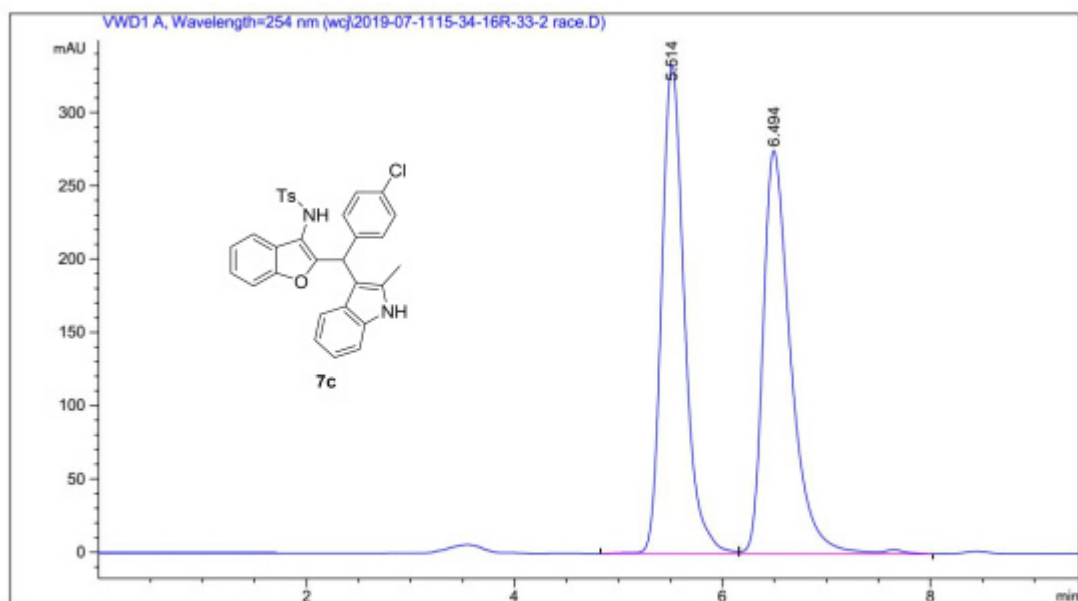

| Peak # | RetTime [min] | Type | Width [min] | Area [mAU*s] | Height [mAU] | Area %  |
|--------|---------------|------|-------------|--------------|--------------|---------|
| 1      | 5.514         | BV   | 0.2332      | 5065.26904   | 333.57312    | 49.8911 |
| 2      | 6.494         | VV R | 0.2776      | 5087.39014   | 275.04663    | 50.1089 |

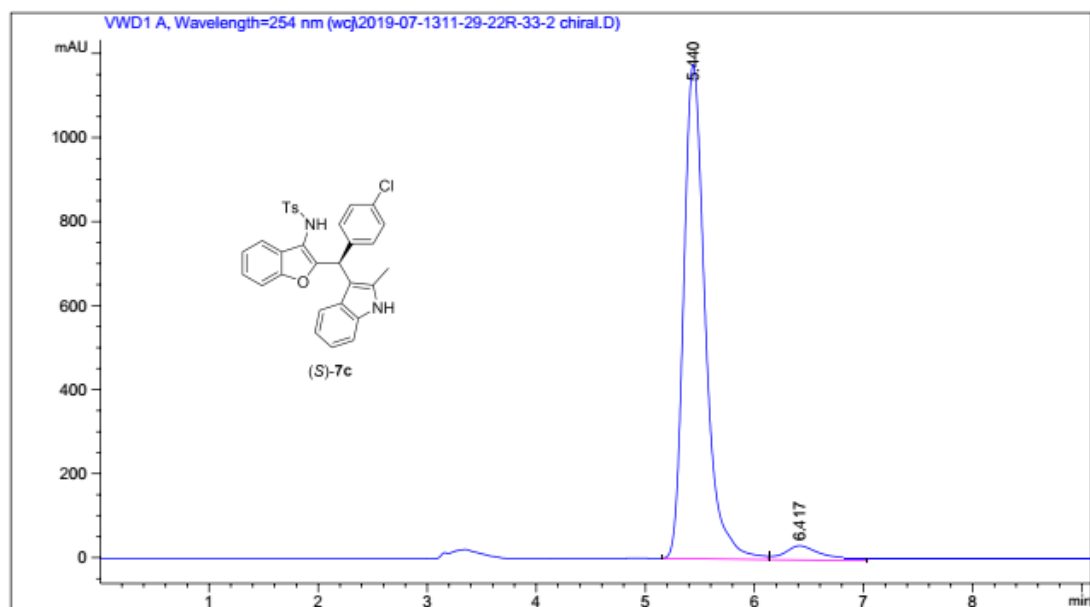

| Peak # | RetTime [min] | Type | Width [min] | Area [mAU*s] | Height [mAU] | Area %  |
|--------|---------------|------|-------------|--------------|--------------|---------|
| 1      | 5.440         | MF   | 0.2280      | 1.60986e4    | 1176.58972   | 95.0344 |
| 2      | 6.417         | FM   | 0.4145      | 841.15784    | 33.81992     | 4.9656  |

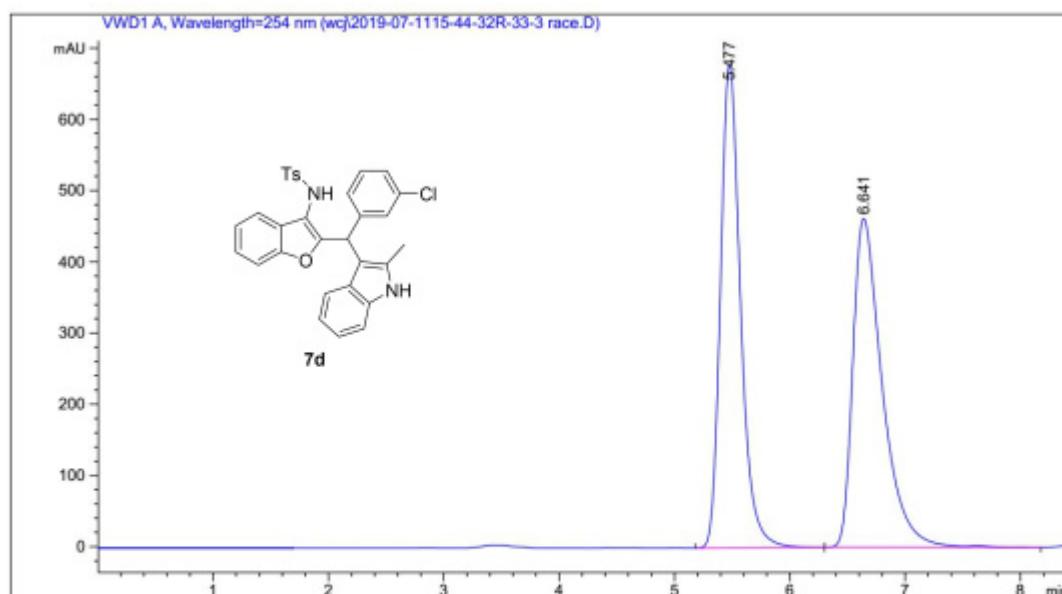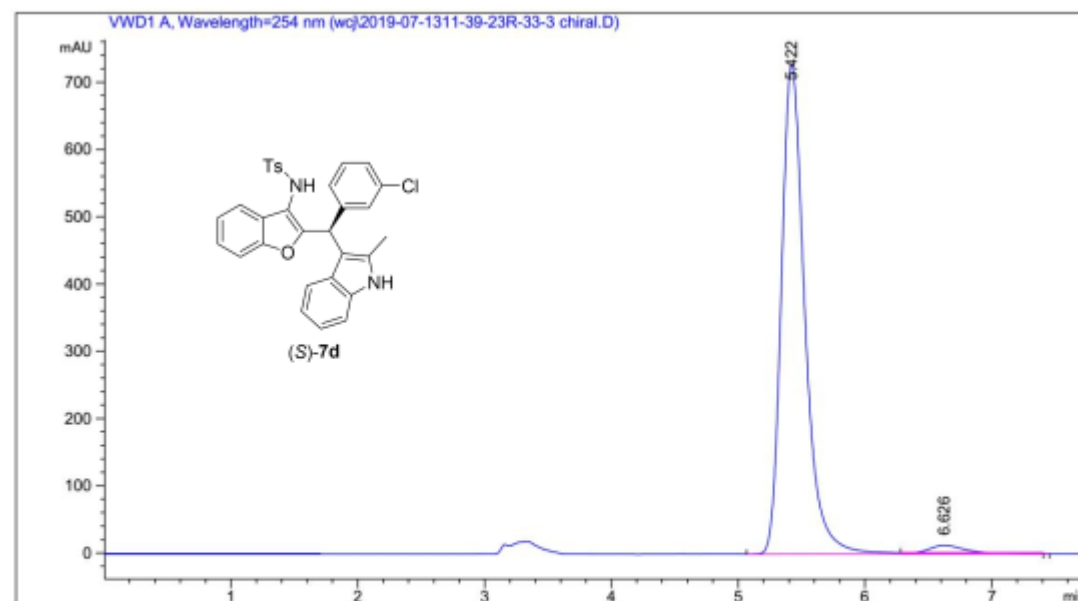

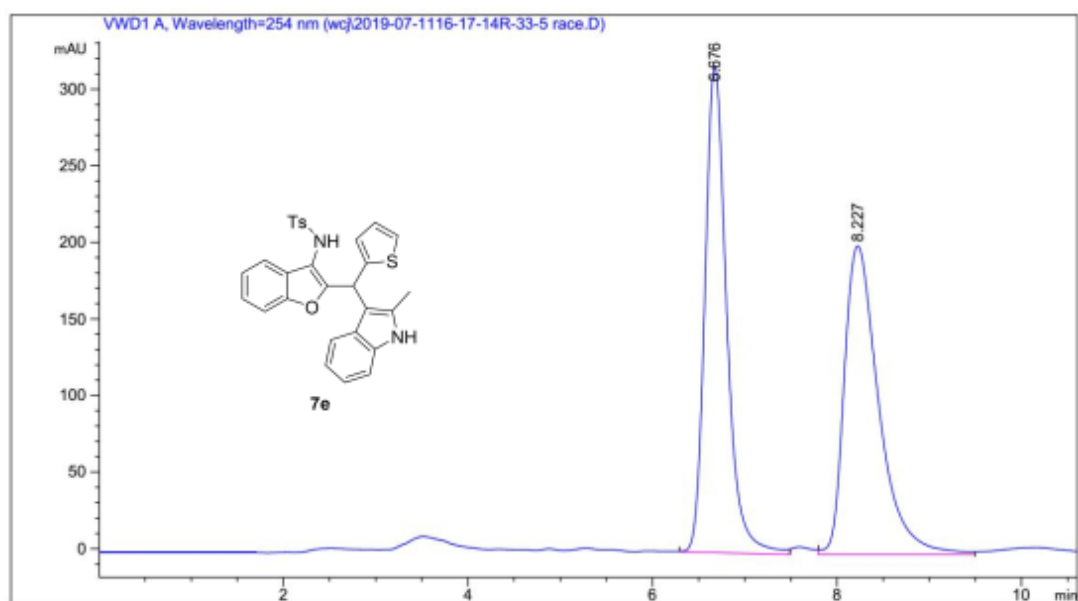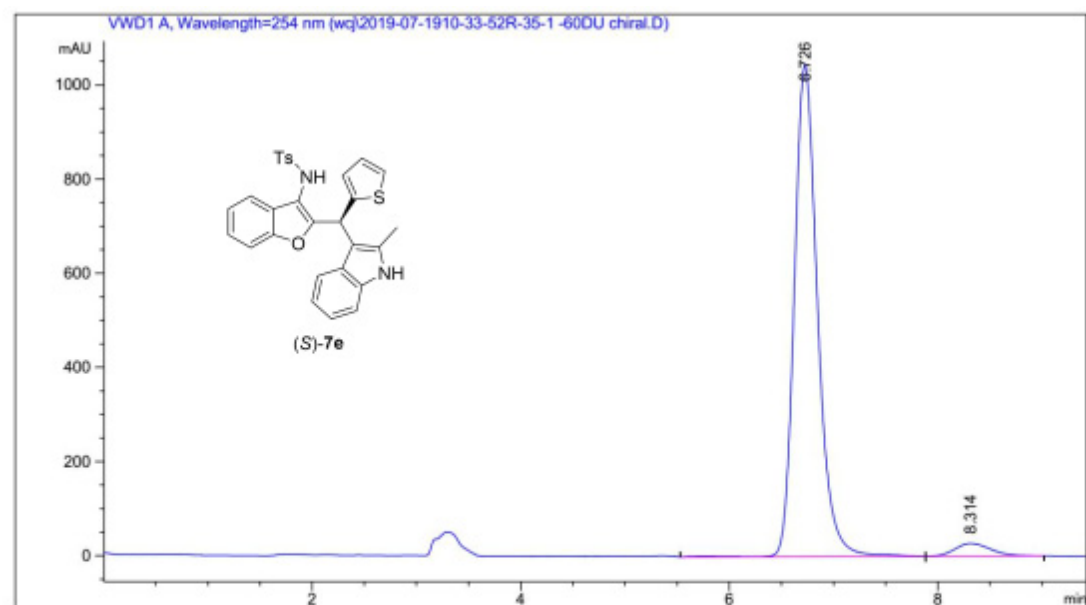

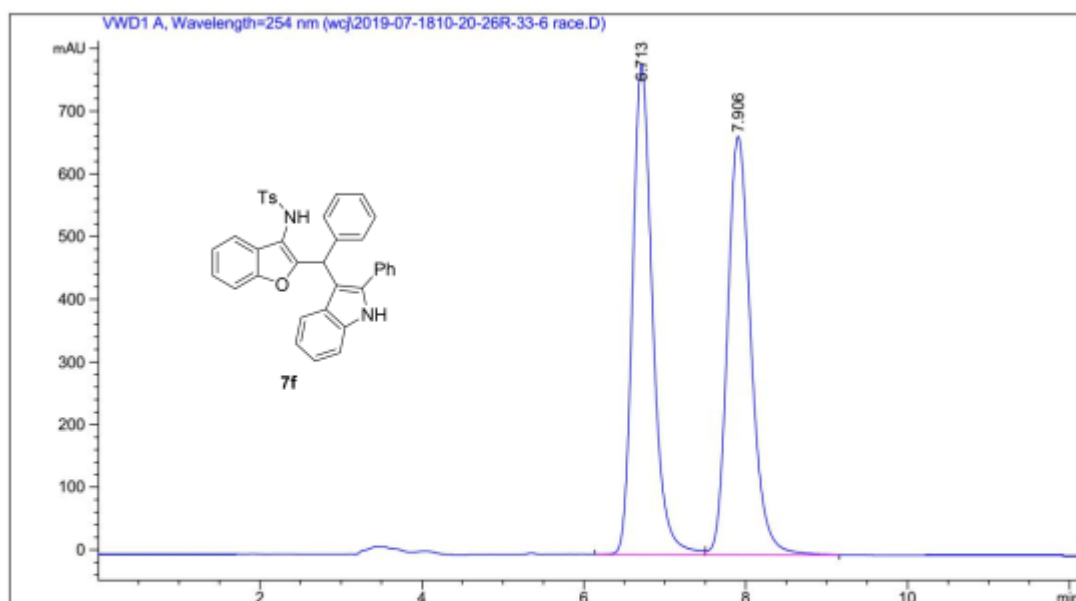

| Peak # | RetTime [min] | Type | Width [min] | Area [mAU*s] | Height [mAU] | Area %  |
|--------|---------------|------|-------------|--------------|--------------|---------|
| 1      | 6.713         | BV   | 0.2621      | 1.33808e4    | 780.28302    | 50.0201 |
| 2      | 7.906         | VB   | 0.3088      | 1.33700e4    | 667.14227    | 49.9799 |

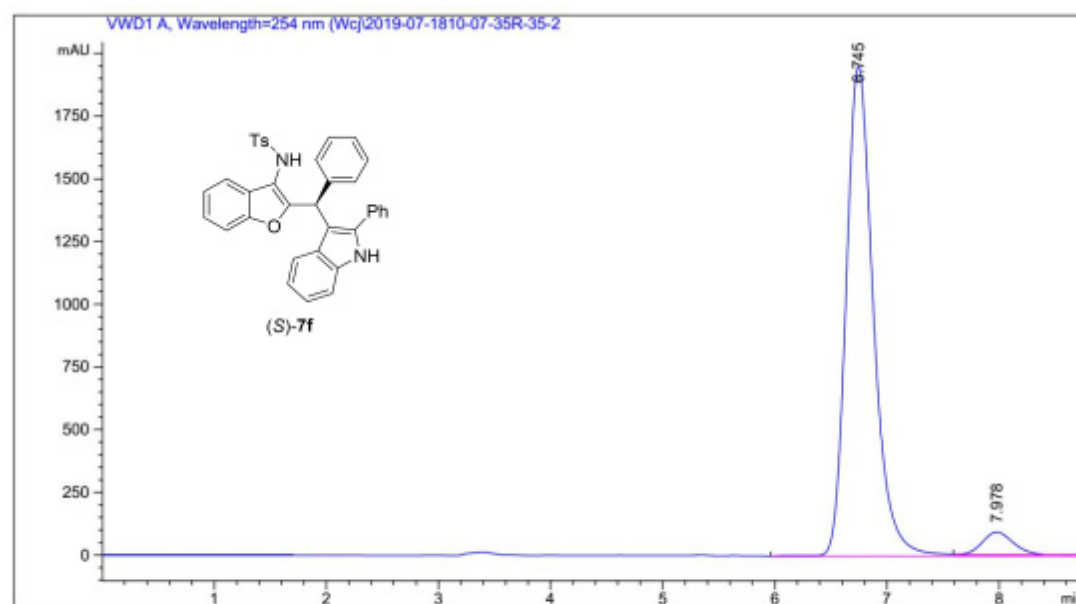

| Peak # | RetTime [min] | Type | Width [min] | Area [mAU*s] | Height [mAU] | Area %  |
|--------|---------------|------|-------------|--------------|--------------|---------|
| 1      | 6.745         | VV R | 0.2576      | 3.29490e4    | 1951.76318   | 94.6657 |
| 2      | 7.978         | VBAE | 0.3065      | 1856.65039   | 92.36141     | 5.3343  |



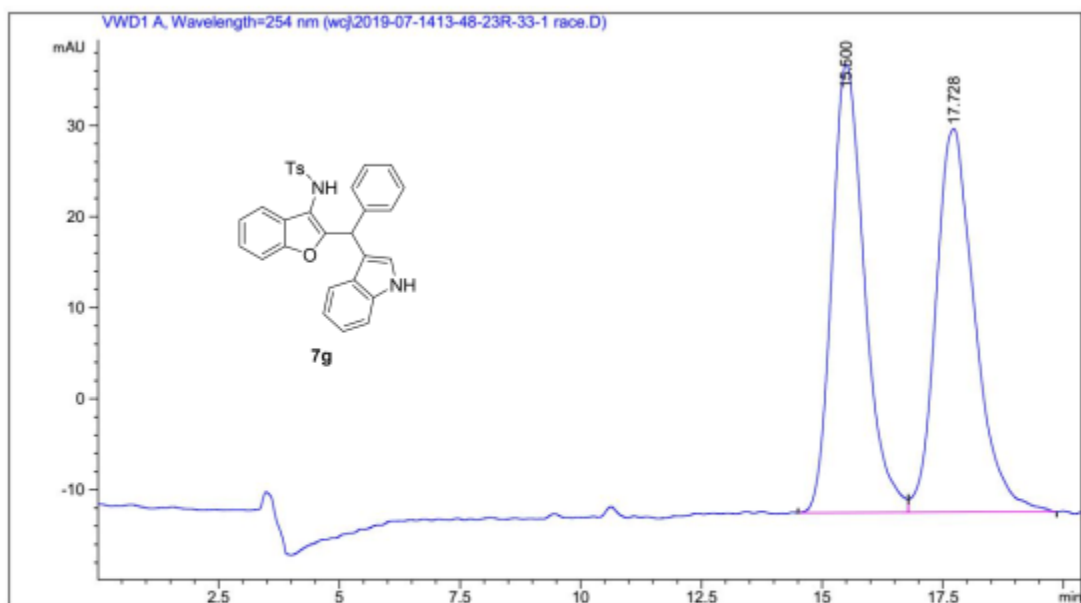

| Peak # | RetTime [min] | Type | Width [min] | Area [mAU*s] | Height [mAU] | Area %  |
|--------|---------------|------|-------------|--------------|--------------|---------|
| 1      | 15.500        | BV   | 0.7311      | 2313.56738   | 49.24519     | 49.5130 |
| 2      | 17.728        | VB   | 0.8147      | 2359.07886   | 42.10588     | 50.4870 |

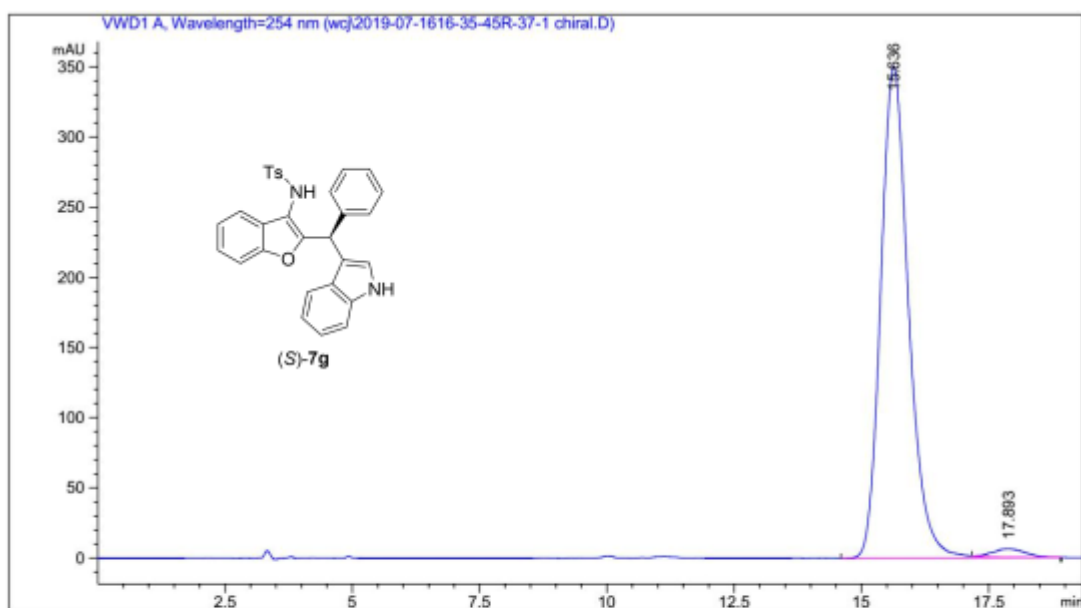

| Peak # | RetTime [min] | Type | Width [min] | Area [mAU*s] | Height [mAU] | Area %  |
|--------|---------------|------|-------------|--------------|--------------|---------|
| 1      | 15.636        | BV R | 0.5882      | 1.32912e4    | 350.68134    | 97.9944 |
| 2      | 17.893        | VB E | 0.6373      | 272.02359    | 6.05303      | 2.0056  |

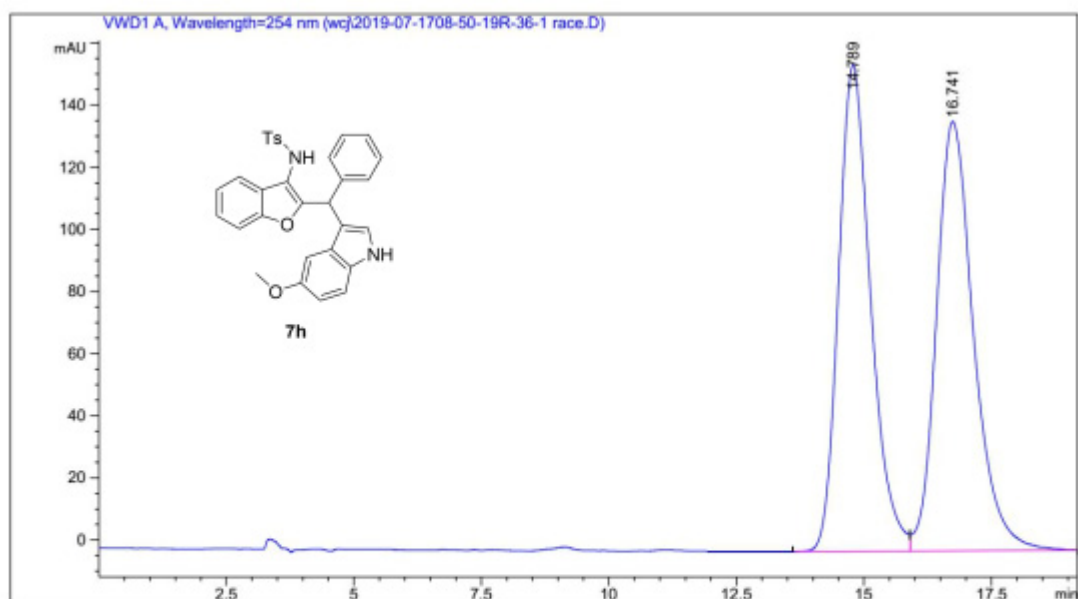

| Peak # | RetTime [min] | Type | Width [min] | Area [mAU*s] | Height [mAU] | Area %  |
|--------|---------------|------|-------------|--------------|--------------|---------|
| 1      | 14.789        | BV   | 0.6722      | 6832.19434   | 156.53864    | 49.3785 |
| 2      | 16.741        | VBA  | 0.7705      | 7004.17188   | 138.15886    | 50.6215 |

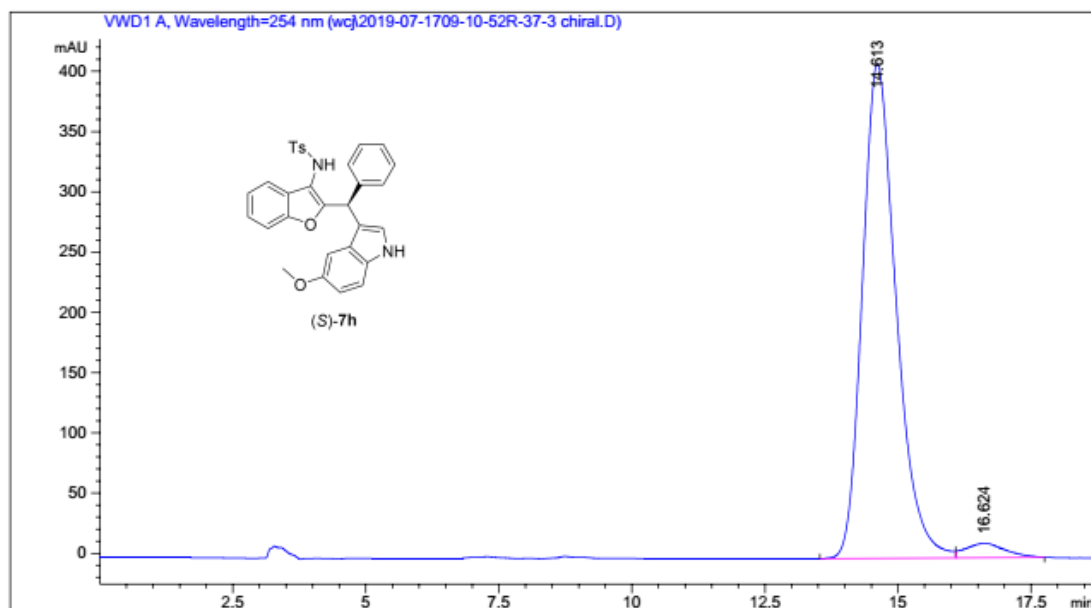

| Peak # | RetTime [min] | Type | Width [min] | Area [mAU*s] | Height [mAU] | Area %  |
|--------|---------------|------|-------------|--------------|--------------|---------|
| 1      | 14.613        | MF   | 0.7348      | 1.80885e4    | 410.30331    | 96.7242 |
| 2      | 16.624        | FM   | 0.8748      | 612.60992    | 11.67148     | 3.2758  |

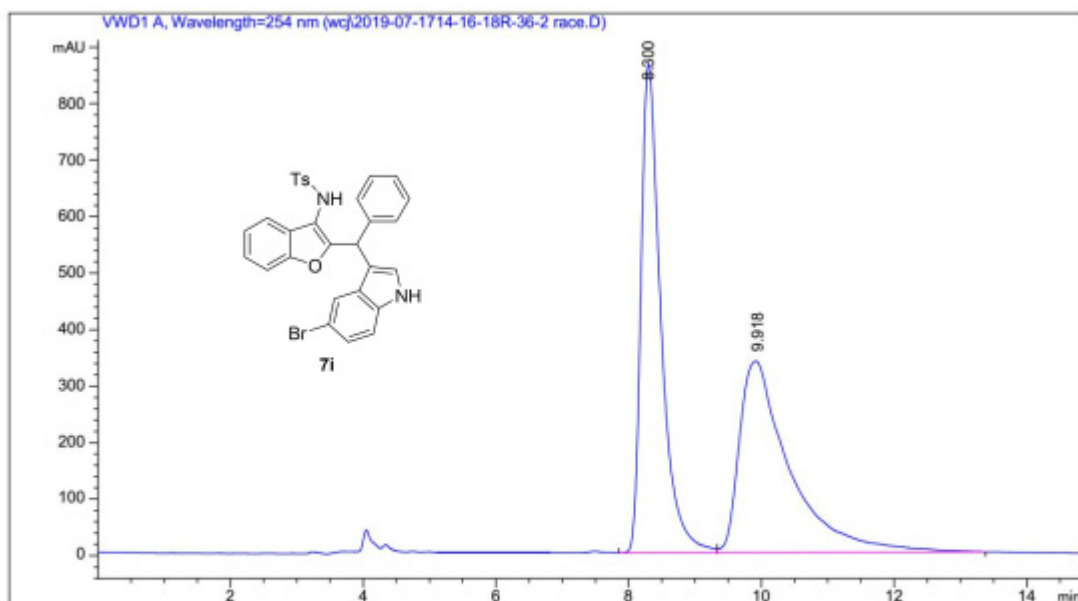

| Peak # | RetTime [min] | Type | Width [min] | Area [mAU*s] | Height [mAU] | Area %  |
|--------|---------------|------|-------------|--------------|--------------|---------|
| 1      | 8.300         | BV   | 0.3089      | 1.79915e4    | 864.28168    | 50.2686 |
| 2      | 9.918         | VB   | 0.7464      | 1.77993e4    | 338.53836    | 49.7314 |

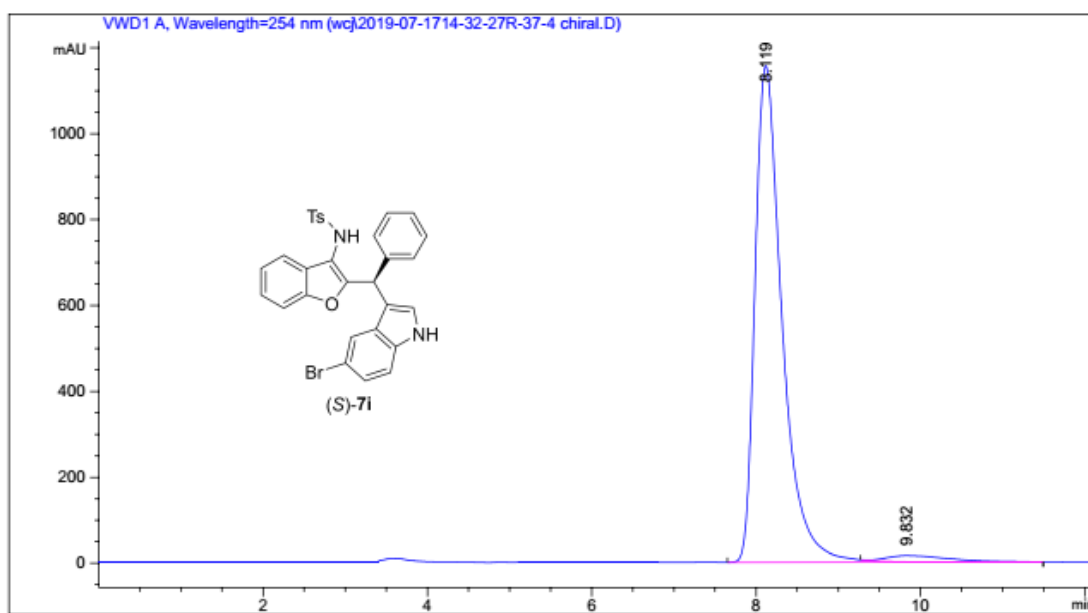

| Peak # | RetTime [min] | Type | Width [min] | Area [mAU*s] | Height [mAU] | Area %  |
|--------|---------------|------|-------------|--------------|--------------|---------|
| 1      | 8.119         | BV R | 0.3437      | 2.65153e4    | 1155.68701   | 97.1591 |
| 2      | 9.832         | VB E | 0.7333      | 775.31024    | 14.39605     | 2.8409  |

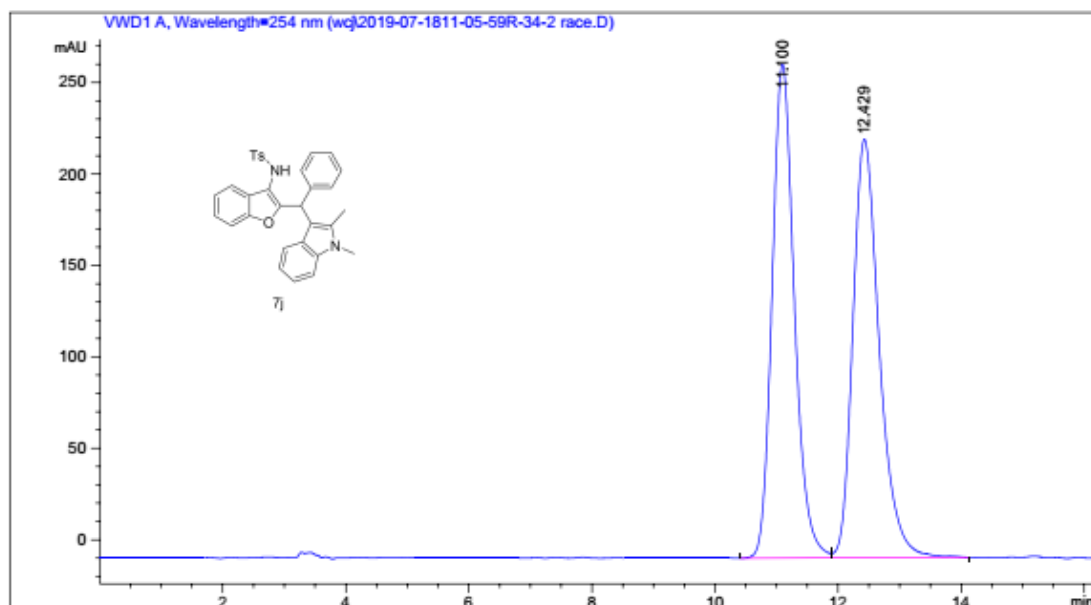

| Peak # | RetTime [min] | Type | Width [min] | Area [mAU*s] | Height [mAU] | Area %  |
|--------|---------------|------|-------------|--------------|--------------|---------|
| 1      | 11.100        | BV   | 0.3854      | 6770.62402   | 270.15363    | 49.7913 |
| 2      | 12.429        | VV R | 0.4580      | 6827.37305   | 228.90221    | 50.2087 |

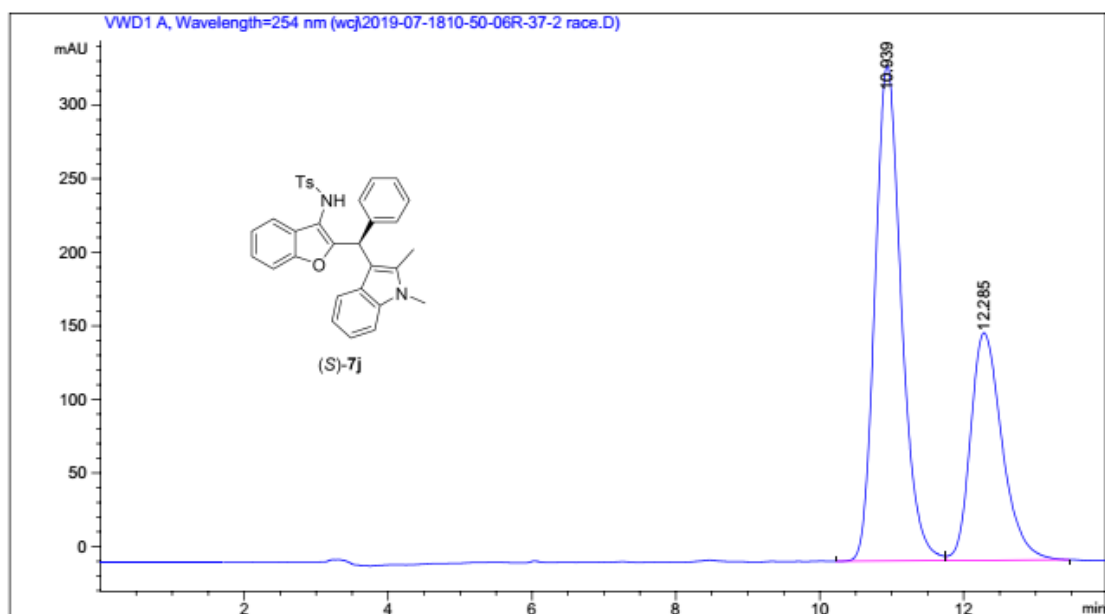

| Peak # | RetTime [min] | Type | Width [min] | Area [mAU*s] | Height [mAU] | Area %  |
|--------|---------------|------|-------------|--------------|--------------|---------|
| 1      | 10.939        | BV   | 0.3916      | 8563.68750   | 336.84872    | 64.5030 |
| 2      | 12.285        | VB   | 0.4694      | 4712.72266   | 154.72401    | 35.4970 |
